# Supplementary material for: Deletions of singular U1 snRNA gene significantly interfere with transcription and 3’-end mRNA formation
Source: PLoS Genet. 2023 Nov 2;19(11):e1011021. doi: 10.1371/journal.pgen.1011021 (PMC10645366; doi:10.1371/journal.pgen.1011021)
Supplement: S3 Table — (XLSX) [file pgen.1011021.s013.xlsx]

## Sheet: note
	S3 Table. Differential alternative splicing events in the U1-gene deletion strains
		1. DASs between 21D-del and WT
		2. DASs between 82Eb-del and WT
		3. DASs between 95Ca-del and WT
		4. DASs between 95Cb-del and WT
		5. DASs between 95Cc-del and WT
								1

## Sheet: 1. 21D del vs WT
	GeneID	gene_symbol	seqnames	start	end	strand	exonStart_0base	exonEnd	upstreamES	upstreamEE	downstreamES	downstreamEE	IJC_SAMPLE_1	SJC_SAMPLE_1	IJC_SAMPLE_2	SJC_SAMPLE_2	IncFormLen	SkipFormLen	PValue	FDR	IncLevel1	IncLevel2	IncLevelDifference
SE_up	FBgn0001216	Hsc70-1	3L	13974061	13977761	+	13975716	13975848	13974559	13974775	13975916	13977761	6,13	17,15	0,1	11,10	280	149	0.000133943	0.0105315	0.158,0.316	0.0,0.051	0.211
	FBgn0001987	Gli	2L	15756002	15762758	-	15762195	15762406	15760401	15760574	15762688	15762758	41,57	79,60	0,1	97,52	298	149	3.66374e-15	2.37148e-12	0.206,0.322	0.0,0.01	0.259
	FBgn0003137	Ppn	3R	28520665	28540324	-	28521814	28522231	28521541	28521700	28522481	28522632	316,213	62,30	91,165	69,64	298	149	0.000252555	0.0187594	0.718,0.78	0.397,0.563	0.269
	FBgn0004838	Hrb27C	2L	6920704	6932057	+	6922730	6922826	6920703	6920861	6923783	6924400	253,183	5,6	503,336	102,53	244	149	3.7332e-09	1.2976e-06	0.969,0.949	0.751,0.795	0.186
	FBgn0005666	bt	4	724400	776474	+	736148	736187	735904	736030	736818	737046	204,170	0,0	407,290	153,120	187	149	0	0	1.0,1.0	0.679,0.658	0.331
	FBgn0027580	PCB	2R	9850703	9861543	-	9853682	9853730	9852547	9853205	9854510	9856020	294,266	451,386	72,143	510,1023	196	149	0	0	0.331,0.344	0.097,0.096	0.241
	FBgn0031413	CG9967	2L	2308761	2357356	-	2330655	2330810	2323350	2323449	2357077	2357356	67,60	0,0	8,4	12,7	298	149	0	0	1.0,1.0	0.25,0.222	0.764
	FBgn0037448	CG15186	3R	6478311	6495025	+	6484689	6484773	6478762	6479384	6489626	6489715	9,16	0,0	8,7	2,10	232	149	2.57266e-05	0.00277541	1.0,1.0	0.72,0.31	0.485
	FBgn0037448	CG15186	3R	6478311	6495025	+	6484704	6484773	6478762	6479384	6489626	6489715	6,7	0,0	6,2	2,10	217	149	2.45655e-05	0.00271479	1.0,1.0	0.673,0.121	0.603
	FBgn0037448	CG15186	3R	6478311	6495025	+	6484736	6484773	6478759	6479384	6489626	6489715	1,1	0,0	4,0	2,10	185	149	4.90691e-06	0.000766663	1.0,1.0	0.617,0.0	0.692
	FBgn0038826	Syp	3R	20756729	20810726	+	20800016	20800300	20798290	20798409	20802289	20802551	920,711	898,948	567,475	1618,1211	298	149	5.04905e-07	0.000134572	0.339,0.273	0.149,0.164	0.15
	FBgn0041182	Tep2	2L	7693727	7701601	-	7696593	7696807	7696027	7696206	7697006	7697157	211,185	30,17	160,72	61,52	298	149	3.46957e-06	0.000659892	0.779,0.845	0.567,0.409	0.324
	FBgn0050463	Pgant9	2R	16673235	16732916	-	16678745	16678856	16678410	16678512	16678980	16679071	154,91	86,42	110,55	128,72	259	149	0.000326249	0.0227421	0.507,0.555	0.331,0.305	0.213
	FBgn0053092	P5CDh2	3R	21877936	21880696	+	21878171	21878308	21877935	21878071	21878368	21878577	38,16	1,0	0,0	18,2	285	149	0	0	0.952,1.0	0.0,0.0	0.976
	FBgn0062928	hpRNA:CR33940	3L	19486745	19488439	-	19487674	19487767	19487161	19487249	19487969	19488439	114,76	0,0	74,37	44,25	241	149	0	0	1.0,1.0	0.51,0.478	0.506
	FBgn0085446	CG34417	X	6540771	6589173	+	6554908	6555259	6552638	6554771	6555865	6561550	288,261	195,183	210,305	241,475	298	149	0.000648381	0.040244	0.425,0.416	0.303,0.243	0.147
	FBgn0259927	CG42450	X	18813297	18830406	+	18823507	18823615	18822581	18823085	18824649	18824934	3,7	4,5	0,0	21,9	256	149	0.000113606	0.00953242	0.304,0.449	0.0,0.0	0.377
	FBgn0266098	rg	X	5085759	5254864	+	5243882	5244050	5243376	5243486	5246522	5249400	42,23	82,67	7,7	158,56	298	149	1.93685e-05	0.00230944	0.204,0.146	0.022,0.059	0.135
SE_down	GeneID	gene_symbol	seqnames	start	end	strand	exonStart_0base	exonEnd	upstreamES	upstreamEE	downstreamES	downstreamEE	IJC_SAMPLE_1	SJC_SAMPLE_1	IJC_SAMPLE_2	SJC_SAMPLE_2	IncFormLen	SkipFormLen	PValue	FDR	IncLevel1	IncLevel2	IncLevelDifference
	FBgn0004167	kst	3L	3336860	3368133	+	3366443	3366773	3366199	3366310	3367514	3368133	320,203	224,136	226,325	67,111	298	149	0.000157793	0.012118	0.417,0.427	0.628,0.594	-0.189
	FBgn0004167	kst	3L	3336860	3368133	+	3366443	3366962	3366199	3366310	3367514	3368133	163,120	224,136	151,192	67,111	298	149	1.57529e-05	0.00203932	0.267,0.306	0.53,0.464	-0.211
	FBgn0004167	kst	3L	3336860	3368133	+	3366443	3367010	3366199	3366310	3367514	3368133	199,155	224,136	160,209	67,111	298	149	0.000495854	0.0312044	0.308,0.363	0.544,0.485	-0.179
	FBgn0013733	shot	2R	13864237	13942110	-	13899449	13899671	13894838	13894969	13901436	13901572	151,97	54,36	264,143	28,18	298	149	1.91476e-05	0.00230944	0.583,0.574	0.825,0.799	-0.234
	FBgn0013733	shot	2R	13864237	13942110	-	13900365	13900449	13894838	13894969	13901436	13901572	230,216	54,36	393,283	28,18	232	149	0.000741936	0.0448228	0.732,0.794	0.9,0.91	-0.142
	FBgn0016694	Pdp1	3L	7811458	7867369	-	7819987	7820029	7818068	7818223	7830386	7831827	9,9	16,16	3,4	1,0	190	149	0.000116817	0.00962364	0.306,0.306	0.702,1.0	-0.545
	FBgn0016930	Dyrk2	2L	14184478	14234126	-	14229458	14229536	14222016	14222081	14233647	14234108	34,20	38,23	44,31	9,3	226	149	4.10158e-07	0.000116152	0.371,0.364	0.763,0.872	-0.45
	FBgn0016930	Dyrk2	2L	14184478	14234126	-	14229531	14229536	14222016	14222081	14233647	14234108	40,41	38,23	156,88	9,3	153	149	1.47449e-12	8.35113e-10	0.506,0.635	0.944,0.966	-0.384
	FBgn0027835	Dp1	2R	18412027	18421124	+	18414828	18414933	18414405	18414587	18415198	18415286	44,8	25,9	19,12	2,0	253	149	4.1861e-05	0.00441098	0.509,0.344	0.848,1.0	-0.497
	FBgn0030052	CG12065	X	8574306	8588528	+	8584842	8584923	8584455	8584575	8585809	8585918	10,7	48,41	39,42	30,61	229	149	9.00494e-05	0.00816027	0.119,0.1	0.458,0.309	-0.274
	FBgn0031717	Oscillin	2L	5547086	5549614	+	5549016	5549081	5548167	5548709	5549443	5549614	66,38	315,213	159,137	339,249	213	149	0.000101322	0.00882866	0.128,0.111	0.247,0.278	-0.143
	FBgn0035049	Mmp1	2R	24671294	24688184	-	24672550	24672851	24671293	24672306	24674972	24675141	27,33	146,107	78,91	97,144	298	149	0.000134811	0.0105315	0.085,0.134	0.287,0.24	-0.154
	FBgn0035049	Mmp1	2R	24671294	24688184	-	24672550	24672851	24671293	24672306	24675062	24675141	46,54	47,44	92,116	38,36	298	149	0.000784071	0.0467451	0.329,0.38	0.548,0.617	-0.228
	FBgn0035049	Mmp1	2R	24671294	24688184	-	24672550	24673316	24671293	24672306	24675062	24675141	39,45	47,44	83,105	38,36	298	149	0.000326167	0.0227421	0.293,0.338	0.522,0.593	-0.242
	FBgn0038165	Task6	3R	13667046	13674542	-	13669016	13669049	13667045	13668834	13669535	13669696	3,1	15,13	20,10	16,8	181	149	5.04591e-05	0.00519614	0.141,0.06	0.507,0.507	-0.407
	FBgn0039890	ABCD	4	184076	193829	-	189997	190061	188577	189248	193672	193829	61,20	18,15	27,14	2,0	212	149	0.000160699	0.0121355	0.704,0.484	0.905,1.0	-0.359
	FBgn0041182	Tep2	2L	7693727	7701601	-	7697006	7697157	7696027	7696206	7697976	7698130	32,17	50,29	62,52	24,13	298	149	7.00557e-07	0.000176346	0.242,0.227	0.564,0.667	-0.381
	FBgn0041182	Tep2	2L	7693727	7701601	-	7697006	7697157	7696593	7696807	7698724	7698992	41,42	179,105	66,51	75,42	298	149	1.09618e-05	0.00160219	0.103,0.167	0.306,0.378	-0.207
	FBgn0053208	Mical	3R	10001554	10042895	-	10009732	10014826	10008695	10008854	10014989	10015105	27,31	309,180	127,82	274,200	298	149	1.79477e-05	0.00225892	0.042,0.079	0.188,0.17	-0.118
	FBgn0053208	Mical	3R	10001554	10042895	-	10009736	10014826	10008695	10008854	10014989	10015105	27,31	309,180	129,82	274,200	298	149	1.3364e-05	0.00183492	0.042,0.079	0.191,0.17	-0.12
	FBgn0053208	Mical	3R	10001554	10042895	-	10037815	10037890	10027329	10027381	10041971	10041998	98,87	15,18	183,174	0,0	223	149	4.00936e-09	1.2976e-06	0.814,0.764	1.0,1.0	-0.211
	FBgn0063485	Lasp	3L	16676406	16711677	-	16678807	16679473	16678424	16678660	16680811	16680947	157,108	38,19	151,109	5,4	298	149	3.1968e-06	0.000658395	0.674,0.74	0.938,0.932	-0.228
	FBgn0063485	Lasp	3L	16676406	16711677	-	16678807	16679869	16678424	16678660	16680811	16680947	159,71	38,19	159,99	5,4	298	149	2.47962e-07	7.4901e-05	0.677,0.651	0.941,0.925	-0.269
	FBgn0063485	Lasp	3L	16676406	16711677	-	16678807	16679932	16678424	16678660	16680811	16680947	207,100	38,19	208,112	5,4	298	149	1.8735e-06	0.000424441	0.731,0.725	0.954,0.933	-0.216
	FBgn0083962	CG34126	2L	4981614	4992702	+	4989389	4989410	4988733	4988848	4990307	4990450	48,22	81,53	67,42	40,29	169	149	9.90509e-05	0.00879999	0.343,0.268	0.596,0.561	-0.273
	FBgn0263346	smash	3R	4659579	4712193	+	4680778	4680837	4659578	4660399	4697190	4697542	18,4	11,5	86,32	3,1	207	149	7.44704e-07	0.000177592	0.541,0.365	0.954,0.958	-0.503
	FBgn0263346	smash	3R	4659579	4712193	+	4680778	4680837	4670796	4670850	4697190	4697542	55,40	106,111	243,116	15,3	207	149	0	0	0.272,0.206	0.921,0.965	-0.704
	FBgn0264815	Pde1c	2L	11814156	11928572	-	11832724	11832787	11830276	11830831	11833259	11833373	1,1	6,5	4,3	0,0	211	149	9.78148e-10	4.02908e-07	0.105,0.124	1.0,1.0	-0.885
	GeneID	gene_symbol	seqnames	start	end	strand	riExonStart_0base	riExonEnd	upstreamES	upstreamEE	downstreamES	downstreamEE	IJC_SAMPLE_1	SJC_SAMPLE_1	IJC_SAMPLE_2	SJC_SAMPLE_2	IncFormLen	SkipFormLen	PValue	FDR	IncLevel1	IncLevel2	IncLevelDifference
RI_up	FBgn0004838	Hrb27C	2L	6920704	6932057	+	6924684	6932057	6924684	6925564	6927980	6932057	62,49	0,3	35,51	17,12	298	149	4.76825e-06	0.000555025	1.0,0.891	0.507,0.68	0.352
	FBgn0031023	CG14200	X	19495505	19518402	+	19511112	19515644	19511112	19511345	19511396	19515644	14,3	12,14	1,1	21,35	199	149	0.000930417	0.0349357	0.466,0.138	0.034,0.021	0.275
	FBgn0031023	CG14200	X	19495505	19518402	+	19511112	19515644	19511112	19511345	19511399	19515644	16,3	0,5	1,1	8,7	202	149	0.000710688	0.0295443	1.0,0.307	0.084,0.095	0.564
	FBgn0031319	CG4896	2L	1177690	1182454	+	1179996	1180449	1179996	1180123	1180212	1180449	10,11	10,11	2,1	7,15	237	149	0.000860209	0.0333761	0.386,0.386	0.152,0.04	0.29
	FBgn0031515	CG9664	2L	3291245	3294706	-	3292173	3292576	3292173	3292298	3292459	3292576	7,7	0,1	19,2	9,5	298	149	0.000163154	0.00999533	1.0,0.778	0.514,0.167	0.548
	FBgn0034002	CG8079	2R	15218379	15224795	+	15221898	15222425	15221898	15221980	15222043	15222425	1,6	1,0	0,2	8,6	211	149	1.68917e-05	0.00140442	0.414,1.0	0.0,0.191	0.611
	FBgn0050286	CG30286	2R	21535716	21536795	-	21535715	21536423	21535715	21536181	21536244	21536423	45,29	3,0	26,29	9,15	211	149	1.36321e-05	0.0012206	0.914,1.0	0.671,0.577	0.333
	FBgn0051477	ATPsynepsilonL	3R	10121773	10122320	+	10121772	10121946	10121772	10121805	10121871	10121946	27,13	0,5	13,4	16,17	214	149	3.87759e-05	0.00265501	1.0,0.644	0.361,0.141	0.571
	FBgn0053092	P5CDh2	3R	21877936	21880696	+	21877935	21878577	21877935	21878071	21878368	21878577	28,25	1,0	15,7	18,2	298	149	4.42317e-07	8.58096e-05	0.933,1.0	0.294,0.636	0.502
RI_down	FBgn0015924	crq	2L	448254	453024	-	452576	453024	452576	452736	452797	453024	15,4	8,4	11,4	0,0	209	149	1.91407e-07	4.45596e-05	0.572,0.416	1.0,1.0	-0.506
	FBgn0030098	CG12057	X	9191657	9192548	+	9191656	9192548	9191656	9192344	9192436	9192548	18,17	7,5	1,6	0,0	240	149	2.77756e-06	0.000359232	0.615,0.679	1.0,1.0	-0.353
	FBgn0031228	ND-15	2L	114726	156030	+	155334	155784	155334	155429	155545	155784	1,4	25,14	4,2	0,0	264	149	1.16498e-08	4.52013e-06	0.022,0.139	1.0,1.0	-0.919
	FBgn0053092	P5CDh2	3R	21877936	21880696	+	21877935	21878577	21877935	21878071	21878171	21878577	6,13	36,20	4,5	0,0	248	149	2.83497e-08	8.24975e-06	0.091,0.281	1.0,1.0	-0.814
	FBgn0053092	P5CDh2	3R	21877936	21880696	+	21878171	21878577	21878171	21878380	21878446	21878577	19,8	10,13	29,5	2,1	214	149	0.00030244	0.017602	0.57,0.3	0.91,0.777	-0.409
	GeneID	gene_symbol	seqnames	start	end	strand	longExonStart_0base	longExonEnd	shortES	shortEE	flankingES	flankingEE	IJC_SAMPLE_1	SJC_SAMPLE_1	IJC_SAMPLE_2	SJC_SAMPLE_2	IncFormLen	SkipFormLen	PValue	FDR	IncLevel1	IncLevel2	IncLevelDifference
A5SS_up	FBgn0001987	Gli	2L	15756002	15762758	-	15762195	15762758	15762688	15762758	15760401	15760574	41,58	79,60	2,3	97,52	298	149	6.15874e-12	3.71327e-09	0.206,0.326	0.01,0.028	0.247
	FBgn0010909	msn	3L	2554847	2586540	-	2586265	2586540	2586413	2586540	2585604	2585738	11,4	0,0	7,0	7,5	296	149	2.98809e-11	1.3554e-08	1.0,1.0	0.335,0.0	0.833
	FBgn0020378	Sp1	X	9729648	9756369	+	9729647	9729883	9729647	9729870	9730299	9730677	29,30	1,5	13,18	10,14	161	149	7.62484e-05	0.00665121	0.964,0.847	0.546,0.543	0.361
	FBgn0028504	CG12182	3L	2595842	2599579	-	2599124	2599579	2599264	2599579	2597193	2599070	5,7	2,6	0,0	10,9	288	149	1.01516e-05	0.00153491	0.564,0.376	0.0,0.0	0.47
	FBgn0031453	Bacc	2L	2752445	2757975	+	2752799	2752840	2752799	2752837	2753371	2753660	206,165	1,0	2,2	74,196	151	149	0	0	0.995,1.0	0.026,0.01	0.98
	FBgn0031769	CG9135	2L	6050800	6053877	+	6050838	6051067	6050838	6050921	6051616	6052022	1,2	0,0	5,0	58,24	294	149	5.26494e-06	0.000852921	1.0,1.0	0.042,0.0	0.979
	FBgn0034885	Eglp4	2R	23607592	23614710	-	23614466	23614710	23614672	23614710	23608131	23608681	10,5	3,2	0,6	5,16	298	149	0.000489012	0.0284379	0.625,0.556	0.0,0.158	0.512
	FBgn0034885	Eglp4	2R	23607592	23614710	-	23614592	23614710	23614672	23614710	23608131	23608681	11,4	3,2	2,2	5,16	228	149	7.00768e-05	0.00662226	0.706,0.567	0.207,0.076	0.495
	FBgn0035397	PAN3	3L	3071133	3090406	+	3072546	3072686	3072546	3072616	3073080	3073478	10,11	0,0	10,4	16,17	218	149	6.54898e-12	3.71327e-09	1.0,1.0	0.299,0.139	0.781
	FBgn0035397	PAN3	3L	3071133	3090406	+	3072546	3072760	3072546	3072616	3073080	3073478	1,5	0,0	3,1	16,17	292	149	1.64634e-08	4.66739e-06	1.0,1.0	0.087,0.029	0.942
	FBgn0036663	CG9674	3L	16787573	16807731	-	16800071	16800189	16800092	16800189	16799483	16799954	22,11	1,2	11,1	11,6	169	149	4.82463e-05	0.0047575	0.951,0.829	0.469,0.128	0.591
	FBgn0052280	CG32280	3L	3165181	3169080	+	3165180	3165254	3165180	3165221	3167941	3168265	37,29	21,14	83,43	244,104	181	149	1.17993e-08	4.46014e-06	0.592,0.63	0.219,0.254	0.374
	FBgn0052280	CG32280	3L	3165181	3169080	+	3165180	3165389	3165180	3165221	3167941	3168265	18,5	21,14	12,8	244,104	298	149	0.000327059	0.0224779	0.3,0.152	0.024,0.037	0.195
	FBgn0261565	Lmpt	3L	16865295	16922487	+	16865294	16865426	16865294	16865404	16866665	16866946	21,24	0,0	13,14	6,9	170	149	4.84254e-08	1.22032e-05	1.0,1.0	0.655,0.577	0.384
	FBgn0261565	Lmpt	3L	16865295	16922487	+	16865294	16865437	16865294	16865404	16866665	16866946	15,18	0,0	20,5	6,9	181	149	2.26804e-05	0.00244949	1.0,1.0	0.733,0.314	0.477
	FBgn0264489	CG43897	3L	9813847	9834345	+	9813846	9813961	9813846	9813922	9820279	9820559	173,103	168,113	93,139	498,281	187	149	1.35466e-05	0.00170687	0.451,0.421	0.13,0.283	0.23
A5SS_down	FBgn0002121	l(2)gl	2L	9839	21376	-	21065	21376	21135	21376	19879	20015	21,17	3,8	7,3	0,0	218	149	0.000468013	0.027933	0.827,0.592	1.0,1.0	-0.29
	FBgn0010225	Gel	3R	4235217	4241057	+	4236087	4236281	4236087	4236148	4236552	4236804	0,1	17,6	14,4	31,5	281	149	0.000603036	0.0317533	0.0,0.081	0.193,0.298	-0.205
	FBgn0013751	Awh	3L	3846206	3861692	+	3860189	3860423	3860189	3860411	3860635	3860761	1,0	6,1	10,10	12,3	160	149	0.000203578	0.0159212	0.134,0.0	0.437,0.756	-0.53
	FBgn0030674	HUWE1	X	15712628	15731935	+	15713900	15714393	15713900	15714381	15714716	15714956	23,28	197,173	83,47	181,125	160	149	7.39228e-05	0.00665121	0.098,0.131	0.299,0.259	-0.165
	FBgn0031449	CG31689	2L	2725674	2739830	+	2730103	2730469	2730103	2730372	2736173	2736430	1,0	17,11	9,7	21,17	245	149	0.000602381	0.0317533	0.035,0.0	0.207,0.2	-0.186
	FBgn0031673	CG31650	2L	5040648	5044712	-	5042960	5043158	5042983	5043158	5042490	5042890	14,10	4,8	39,7	2,0	171	149	0.000407673	0.0256834	0.753,0.521	0.944,1.0	-0.335
	FBgn0033005	CG3107	2R	5090581	5095090	+	5090580	5090742	5090580	5090641	5091871	5092476	8,6	22,12	25,20	14,6	249	149	0.00032462	0.0224779	0.179,0.23	0.517,0.666	-0.387
	FBgn0036974	eRF1	3L	20348355	20353873	+	20348354	20348650	20348354	20348385	20348941	20349206	18,12	15,6	24,28	2,3	298	149	0.00023946	0.0175192	0.375,0.5	0.857,0.824	-0.403
	FBgn0051716	Cnot4	2L	10396716	10403206	+	10399594	10399712	10399594	10399688	10399767	10400679	83,53	100,74	115,87	52,54	172	149	0.000405824	0.0256834	0.418,0.383	0.657,0.583	-0.22
	FBgn0259170	alpha-Man-Ia	X	10266792	10325958	-	10325675	10325958	10325813	10325958	10323565	10324356	2,4	7,7	15,6	4,0	286	149	0.000399532	0.0256834	0.13,0.229	0.661,1.0	-0.651
	FBgn0259170	alpha-Man-Ia	X	10266792	10325958	-	10325783	10325958	10325813	10325958	10323565	10324356	1,1	7,7	9,1	4,0	178	149	0.000616025	0.0317533	0.107,0.107	0.653,1.0	-0.72
	FBgn0259984	kuz	2L	13550139	13639411	+	13550138	13550420	13550138	13550293	13551141	13551666	174,140	133,102	140,76	30,24	275	149	1.64887e-05	0.00196823	0.415,0.426	0.717,0.632	-0.254
	FBgn0260388	CG42514	3L	16491838	16496236	-	16496052	16496236	16496138	16496236	16495299	16495536	0,1	43,26	75,47	46,45	234	149	0	0	0.0,0.024	0.509,0.399	-0.442
	FBgn0261836	Msp300	2L	5100877	5207002	+	5125827	5139015	5125827	5127057	5139358	5139673	227,151	44,40	373,243	16,15	298	149	4.82837e-07	9.95521e-05	0.721,0.654	0.921,0.89	-0.218
	FBgn0264574	Glut1	3L	914074	993788	+	980053	980221	980053	980191	980950	981207	6,7	24,12	23,9	9,4	178	149	0.000160964	0.0130381	0.173,0.328	0.681,0.653	-0.417
	FBgn0267001	Ten-a	X	12043698	12335214	+	12203797	12203996	12203797	12203978	12204138	12204409	0,0	8,5	4,4	7,1	166	149	0.000443512	0.0271861	0.0,0.0	0.339,0.782	-0.56
	GeneID	gene_symbol	seqnames	start	end	strand	longExonStart_0base	longExonEnd	shortES	shortEE	flankingES	flankingEE	IJC_SAMPLE_1	SJC_SAMPLE_1	IJC_SAMPLE_2	SJC_SAMPLE_2	IncFormLen	SkipFormLen	PValue	FDR	IncLevel1	IncLevel2	IncLevelDifference
A3SS_up	FBgn0004360	Wnt2	2R	9494166	9503188	+	9501370	9501588	9501375	9501588	9494165	9495253	52,37	4,3	28,12	16,5	153	149	0.000388237	0.0399329	0.927,0.923	0.63,0.7	0.26
	FBgn0025387	CG12184	X	4627380	4630936	-	4627379	4627759	4627379	4627741	4627822	4627971	8,3	4,5	0,0	2,11	166	149	6.54427e-06	0.00157062	0.642,0.35	0.0,0.0	0.496
	FBgn0028540	CG9008	2L	13774340	13780165	-	13774339	13775185	13774339	13775047	13775254	13775406	14,17	26,16	2,2	41,15	286	149	4.61715e-05	0.00831087	0.219,0.356	0.025,0.065	0.242
	FBgn0028952	Kebab	2L	2045494	2048054	+	2046065	2046218	2046068	2046218	2045699	2046011	11,12	0,0	5,3	2,10	151	149	8.42663e-05	0.0121343	1.0,1.0	0.712,0.228	0.53
	FBgn0030846	CG12992	X	17588865	17591706	+	17590011	17590468	17590014	17590468	17588987	17589095	8,6	11,10	0,0	9,4	151	149	1.57376e-07	5.66555e-05	0.418,0.372	0.0,0.0	0.395
	FBgn0031228	ND-15	2L	114726	156030	+	155545	155784	155566	155784	155334	155429	26,14	35,15	0,0	63,31	169	149	1.21014e-14	1.30695e-11	0.396,0.451	0.0,0.0	0.423
	FBgn0051068	CG31068	3R	27233698	27236360	+	27235914	27235984	27235917	27235984	27235496	27235861	6,10	2,2	3,1	7,5	151	149	0.000328939	0.0355254	0.747,0.831	0.297,0.165	0.558
	FBgn0053092	P5CDh2	3R	21877936	21880696	+	21878171	21878577	21878368	21878577	21877935	21878071	58,36	1,0	12,4	18,2	298	149	3.94362e-11	2.12956e-08	0.967,1.0	0.25,0.5	0.609
	FBgn0262872	milt	2L	7037823	7056010	+	7046253	7047214	7046319	7047214	7042358	7042512	440,289	46,25	132,60	105,60	214	149	0	0	0.869,0.889	0.467,0.41	0.441
A3SS_down	FBgn0028411	Nxt1	2R	23811321	23811974	-	23811320	23811737	23811320	23811724	23811794	23811881	0,2	75,59	9,14	43,65	161	149	0.000260073	0.0295662	0.0,0.03	0.162,0.166	-0.149
	FBgn0032940	Mondo	2L	21286078	21310050	-	21308287	21309091	21308287	21308995	21309579	21310050	1,1	5,6	9,5	3,0	244	149	5.32342e-05	0.00884507	0.109,0.092	0.647,1.0	-0.723
	FBgn0035772	Sh3beta	3L	7364584	7369260	-	7364583	7364964	7364583	7364961	7367558	7367984	10,3	14,2	12,6	0,1	151	149	9.38519e-06	0.0020272	0.413,0.597	1.0,0.856	-0.423
	FBgn0037773	CG5359	3R	9999771	10001276	-	9999770	10000368	9999770	10000365	10000572	10000881	1,2	5,12	4,8	0,3	151	149	3.00483e-05	0.00590039	0.165,0.141	1.0,0.725	-0.71
	FBgn0040375	CG13760	X	2583745	2585699	-	2584462	2584602	2584462	2584548	2584666	2584935	0,1	15,2	7,9	2,5	202	149	1.90029e-06	0.000586375	0.0,0.269	0.721,0.57	-0.511
	FBgn0264489	CG43897	3L	9813847	9834345	+	9832195	9832679	9832201	9832679	9830999	9831440	304,216	49,58	383,636	9,45	154	149	6.33972e-05	0.00978128	0.857,0.783	0.976,0.932	-0.134
	FBgn0267376	SelR	3R	10863355	10868642	-	10866808	10866976	10866808	10866960	10868438	10868642	46,16	28,21	46,32	0,1	164	149	1.38619e-11	9.98058e-09	0.599,0.409	1.0,0.967	-0.48
	GeneID	gene_symbol	seqnames	start	end	strand	X1stExonStart_0base	X1stExonEnd	X2ndExonStart_0base	X2ndExonEnd	upstreamES	upstreamEE	downstreamES	downstreamEE	IJC_SAMPLE_1	SJC_SAMPLE_1	IJC_SAMPLE_2	SJC_SAMPLE_2	IncFormLen	SkipFormLen	PValue	FDR	IncLevel1	IncLevel2	IncLevelDifference
MXE_up	FBgn0002121	l(2)gl	2L	9839	21376	-	17052	17212	19884	20020	14932	15711	21135	21376	225,132	199,193	18,9	187,156	284	298	0	0	0.543,0.418	0.092,0.057	0.406
	FBgn0031213	galectin	2L	71757	76211	+	71949	72081	74902	75018	71756	71804	75077	76211	125,127	350,294	48,24	326,172	280	264	6.977e-05	0.00530733	0.252,0.289	0.122,0.116	0.151
	FBgn0031413	CG9967	2L	2308761	2357356	-	2323350	2323449	2330655	2330810	2310661	2310870	2357077	2357356	47,26	24,26	12,1	39,22	298	247	1.93072e-05	0.00177465	0.619,0.453	0.203,0.036	0.417
	FBgn0032456	MRP	2L	12719045	12766546	+	12728577	12728798	12730842	12731066	12726745	12727116	12737958	12738176	10,6	42,22	0,1	81,41	298	298	0.000149829	0.00847494	0.192,0.214	0.0,0.024	0.191
	FBgn0032456	MRP	2L	12719045	12766546	+	12728577	12728798	12737397	12737618	12726745	12727116	12737958	12738176	10,6	27,19	0,1	15,9	298	298	0.000583824	0.0238503	0.27,0.24	0.0,0.1	0.205
	FBgn0032456	MRP	2L	12719045	12766546	+	12729184	12729405	12729930	12730151	12726745	12727116	12737958	12738176	49,31	80,34	8,17	109,51	298	298	0.000194655	0.010224	0.38,0.477	0.068,0.25	0.269
	FBgn0032456	MRP	2L	12719045	12766546	+	12729184	12729405	12730842	12731066	12726745	12727116	12737958	12738176	49,31	42,22	8,17	81,41	298	298	6.1733e-06	0.000680915	0.538,0.585	0.09,0.293	0.37
	FBgn0033159	Dscam1	2R	7317924	7381899	-	7356972	7357096	7357788	7357915	7348130	7348975	7361717	7361867	6,1	2,1	0,2	8,6	275	272	0.000506112	0.0218918	0.748,0.497	0.0,0.248	0.499
	FBgn0033159	Dscam1	2R	7317924	7381899	-	7363331	7363490	7363880	7364048	7361717	7361867	7368387	7368732	8,6	5,3	0,2	8,12	298	298	1.204e-05	0.00126477	0.615,0.667	0.0,0.143	0.57
	FBgn0033159	Dscam1	2R	7317924	7381899	-	7363594	7363765	7363880	7364048	7361717	7361867	7368387	7368732	8,6	9,12	0,2	16,26	298	298	6.22417e-05	0.00508538	0.471,0.333	0.0,0.071	0.367
	FBgn0035348	CG16758	3L	2499372	2503606	-	2501069	2501141	2502594	2502723	2499690	2500462	2503142	2503606	13,17	13,18	18,15	83,61	277	220	0.000553288	0.0230293	0.443,0.429	0.147,0.163	0.281
	FBgn0041182	Tep2	2L	7693727	7701601	-	7697006	7697157	7697976	7698130	7696027	7696206	7698724	7698992	60,54	67,56	47,23	120,91	298	298	0.00014516	0.00842694	0.472,0.491	0.281,0.202	0.24
	FBgn0050463	Pgant9	2R	16673235	16732916	-	16678410	16678512	16678745	16678856	16675140	16675248	16678980	16679071	284,232	124,70	215,142	182,112	259	250	0.000227485	0.0116705	0.689,0.762	0.533,0.55	0.184
	FBgn0263346	smash	3R	4659579	4712193	+	4670796	4670850	4680778	4680837	4659578	4660399	4697190	4697542	267,214	18,4	177,86	86,32	202	207	2.10942e-15	1.16335e-12	0.938,0.982	0.678,0.734	0.254
MXE_down	FBgn0003429	slo	3R	24662491	24711595	+	24698197	24698269	24703020	24703053	24695340	24695417	24703117	24703307	4,1	14,9	5,10	2,2	220	181	1.79296e-05	0.00171968	0.19,0.084	0.673,0.804	-0.602
	FBgn0004893	bowl	2L	3771700	3784121	+	3772460	3772694	3779692	3780579	3771699	3771784	3781903	3784121	10,6	119,101	109,113	122,147	298	298	0	0	0.078,0.056	0.472,0.435	-0.387
	FBgn0011217	eff	3R	14732414	14741319	-	14734386	14734418	14737419	14737483	14733699	14733883	14740379	14740791	0,3	299,243	543,248	512,374	212	180	0	0	0.0,0.01	0.474,0.36	-0.412
	FBgn0013305	Nmda1	2R	12877094	12880230	-	12879051	12879146	12879196	12879222	12878384	12878710	12879447	12879656	29,22	58,26	57,30	3,9	174	243	4.20581e-09	9.27802e-07	0.411,0.542	0.964,0.823	-0.417
	FBgn0013305	Nmda1	2R	12877094	12880230	-	12879051	12879146	12879196	12879222	12878384	12878710	12879688	12879798	120,145	90,68	252,148	19,25	174	243	3.17742e-09	8.76174e-07	0.651,0.749	0.949,0.892	-0.221
	FBgn0032456	MRP	2L	12719045	12766546	+	12728020	12728241	12729184	12729405	12726745	12727116	12737958	12738176	64,33	49,31	81,42	8,17	298	298	0.000599931	0.0240627	0.566,0.516	0.91,0.712	-0.27
	FBgn0032456	MRP	2L	12719045	12766546	+	12730842	12731066	12737397	12737618	12726745	12727116	12737958	12738176	42,22	27,19	81,41	15,9	298	298	0.000524061	0.0222323	0.609,0.537	0.844,0.82	-0.259
	FBgn0033159	Dscam1	2R	7317924	7381899	-	7350580	7350704	7359666	7359790	7348130	7348975	7361717	7361867	1,0	6,5	3,5	9,1	272	272	0.00126428	0.0410148	0.143,0.0	0.25,0.833	-0.47
	FBgn0033159	Dscam1	2R	7317924	7381899	-	7363880	7364048	7365017	7365179	7361717	7361867	7368387	7368732	9,9	8,6	20,6	0,2	298	298	0.000468261	0.0206597	0.529,0.6	1.0,0.75	-0.31
	FBgn0033159	Dscam1	2R	7317924	7381899	-	7363880	7364048	7365311	7365482	7361717	7361867	7368387	7368732	6,11	8,6	9,12	0,2	298	298	0.000767866	0.028609	0.429,0.647	1.0,0.857	-0.39
	FBgn0033159	Dscam1	2R	7317924	7381899	-	7363880	7364048	7365942	7366104	7361717	7361867	7368387	7368732	11,13	8,6	22,6	0,2	298	298	0.00146515	0.0468423	0.579,0.684	1.0,0.75	-0.244
	FBgn0033159	Dscam1	2R	7317924	7381899	-	7363880	7364048	7366465	7366627	7361717	7361867	7368387	7368732	2,9	8,6	2,17	0,2	298	298	0.000449302	0.0202278	0.2,0.6	1.0,0.895	-0.547
	FBgn0041182	Tep2	2L	7693727	7701601	-	7696593	7696807	7697006	7697157	7696027	7696206	7698724	7698992	67,56	386,287	120,91	228,102	298	298	7.70141e-07	0.000106183	0.148,0.163	0.345,0.472	-0.253
	FBgn0041182	Tep2	2L	7693727	7701601	-	7696593	7696807	7697400	7697581	7696027	7696206	7698724	7698992	336,330	386,287	385,310	228,102	298	298	0.000919027	0.0316777	0.465,0.535	0.628,0.752	-0.19
	FBgn0264270	Sxl	X	7074550	7098053	-	7090133	7090504	7096902	7096935	7087613	7087659	7096997	7097066	1,0	5,6	5,2	5,1	181	298	0.000140146	0.00842694	0.248,0.0	0.622,0.767	-0.571
	FBgn0264815	Pde1c	2L	11814156	11928572	-	11830276	11830831	11832724	11832787	11818599	11818849	11833259	11833373	2,3	12,9	7,6	3,3	211	298	0.000615898	0.024262	0.191,0.32	0.767,0.739	-0.497

## Sheet: 2. 82Eb del vs WT
	GeneID	gene_symbol	seqnames	start	end	strand	exonStart_0base	exonEnd	upstreamES	upstreamEE	downstreamES	downstreamEE	IJC_SAMPLE_1	SJC_SAMPLE_1	IJC_SAMPLE_2	SJC_SAMPLE_2	IncFormLen	SkipFormLen	PValue	FDR	IncLevel1	IncLevel2	IncLevelDifference
se_up	FBgn0001987	Gli	2L	15756002	15762758	-	15762195	15762406	15760401	15760574	15762688	15762758	41,57	79,60	4,4	51,47	298	149	3.58738e-07	6.07464e-05	0.206,0.322	0.038,0.041	0.225
	FBgn0003137	Ppn	3R	28520665	28540324	-	28521814	28522231	28521541	28521700	28522481	28522632	316,213	62,30	181,183	87,69	298	149	8.39949e-05	0.00698227	0.718,0.78	0.51,0.57	0.209
	FBgn0003429	slo	3R	24662491	24711595	+	24703020	24703053	24695340	24695417	24703117	24703307	14,9	2,10	3,0	14,4	181	149	0.000601878	0.0302394	0.852,0.426	0.15,0.0	0.564
	FBgn0004648	svr	X	496446	509072	+	499848	500608	496600	497389	501984	502220	258,170	75,58	299,232	168,188	298	149	0.000817154	0.0363247	0.632,0.594	0.471,0.382	0.186
	FBgn0004838	Hrb27C	2L	6920704	6932057	+	6922730	6922826	6920703	6920861	6923783	6924400	253,183	5,6	490,426	67,101	244	149	3.24033e-08	7.40739e-06	0.969,0.949	0.817,0.72	0.191
	FBgn0004854	B-H2	X	17314581	17324175	+	17320734	17320774	17314580	17315911	17320838	17321091	7,2	4,2	0,0	10,6	188	149	7.12279e-06	0.000856984	0.581,0.442	0.0,0.0	0.511
	FBgn0013733	shot	2R	13864237	13942110	-	13866060	13866126	13864236	13865495	13866448	13866632	208,155	63,55	583,500	368,367	214	149	0.000412046	0.0229741	0.697,0.662	0.524,0.487	0.174
	FBgn0014133	bif	X	11678970	11694740	+	11692798	11693177	11689200	11689543	11693546	11694740	260,194	123,106	116,119	143,123	298	149	0.000125789	0.00927595	0.514,0.478	0.289,0.326	0.189
	FBgn0015371	chn	2R	15115236	15144783	+	15140470	15140677	15139078	15140095	15140973	15141300	4,6	0,0	15,7	10,4	298	149	6.34855e-09	1.8141e-06	1.0,1.0	0.429,0.467	0.552
	FBgn0019660	lncRNA:roX2	X	11579065	11580432	+	11579348	11579399	11579064	11579124	11579669	11580084	349,340	112,105	92,79	219,181	199	149	0	0	0.7,0.708	0.239,0.246	0.461
	FBgn0020887	Su(z)12	3L	19918242	19923462	-	19919358	19919520	19918241	19919290	19920153	19920986	54,27	54,35	27,25	85,98	298	149	0.000411123	0.0229741	0.333,0.278	0.137,0.113	0.18
	FBgn0024189	sns	2R	8798489	8856091	+	8834951	8835101	8833792	8833981	8841356	8841511	8,3	1,0	11,10	8,8	298	149	0.000253872	0.0150741	0.8,1.0	0.407,0.385	0.504
	FBgn0027492	wdb	3R	27561675	27582241	-	27580156	27580325	27568278	27568591	27582001	27582241	136,89	171,88	113,60	258,209	298	149	0.000319844	0.0187478	0.285,0.336	0.18,0.126	0.158
	FBgn0028577	hfp	3L	1496853	1502590	-	1501169	1501406	1500244	1500388	1501798	1501892	12,8	1,1	5,6	12,5	298	149	9.24526e-05	0.0074918	0.857,0.8	0.172,0.375	0.555
	FBgn0028577	hfp	3L	1496853	1502590	-	1501345	1501406	1500244	1500388	1501798	1501892	12,8	1,1	5,8	12,5	209	149	0.000337712	0.0193002	0.895,0.851	0.229,0.533	0.492
	FBgn0028577	hfp	3L	1496853	1502590	-	1501350	1501406	1500244	1500388	1501798	1501892	9,8	1,1	4,8	12,5	204	149	0.00077022	0.0355702	0.868,0.854	0.196,0.539	0.493
	FBgn0032456	MRP	2L	12719045	12766546	+	12728577	12728798	12726745	12727116	12737958	12738176	10,6	0,3	0,2	8,4	298	149	3.65781e-05	0.00327912	1.0,0.5	0.0,0.2	0.65
	FBgn0032456	MRP	2L	12719045	12766546	+	12729184	12729405	12726745	12727116	12737958	12738176	49,31	0,3	12,8	8,4	298	149	1.49935e-05	0.00152334	1.0,0.838	0.429,0.5	0.455
	FBgn0033062	Ars2	2R	6080828	6085625	-	6084168	6084390	6083940	6084007	6084507	6084787	55,50	53,46	28,44	95,105	298	149	0.000220208	0.0134239	0.342,0.352	0.128,0.173	0.196
	FBgn0033504	CAP	2R	10269016	10307024	+	10293340	10293439	10278735	10284801	10293621	10293761	11,14	0,1	26,25	5,8	247	149	0.000934576	0.0395637	1.0,0.894	0.758,0.653	0.242
	FBgn0038826	Syp	3R	20756729	20810726	+	20800016	20800300	20798290	20798409	20802289	20802551	920,711	898,948	294,409	904,1535	298	149	1.15901e-11	5.88775e-09	0.339,0.273	0.14,0.118	0.177
	FBgn0039709	Cad99C	3R	29841657	29854699	+	29842724	29842873	29841656	29841790	29845598	29845760	152,138	1,9	202,155	74,59	297	149	2.81775e-13	1.84039e-10	0.987,0.885	0.578,0.569	0.363
	FBgn0041182	Tep2	2L	7693727	7701601	-	7696593	7696807	7696027	7696206	7697006	7697157	211,185	30,17	73,63	54,73	298	149	7.77156e-16	5.92193e-13	0.779,0.845	0.403,0.301	0.46
	FBgn0051363	Jupiter	3R	11590386	11619906	-	11591500	11591911	11590385	11591307	11591994	11592244	254,216	52,44	156,168	115,98	298	149	1.48049e-08	3.98163e-06	0.709,0.711	0.404,0.462	0.277
	FBgn0053113	Rtnl1	2L	4992808	5009720	-	5004171	5004207	4994786	4994994	5008180	5009720	479,330	292,219	413,326	538,429	184	149	2.65843e-05	0.00253215	0.571,0.55	0.383,0.381	0.178
	FBgn0085376	CG34347	3R	31311157	31371748	+	31366842	31367522	31361118	31362358	31370235	31371748	25,18	0,0	54,32	5,8	298	149	0.000464789	0.0252978	1.0,1.0	0.844,0.667	0.244
	FBgn0085446	CG34417	X	6540771	6589173	+	6554908	6555259	6552638	6554771	6555865	6561550	288,261	195,183	387,307	550,595	298	149	6.72608e-07	0.00010604	0.425,0.416	0.26,0.205	0.188
	FBgn0086690	Plp	3L	15066081	15094724	-	15074324	15074492	15072528	15073194	15074683	15075847	264,214	11,15	237,184	39,42	298	149	9.34017e-05	0.0074918	0.923,0.877	0.752,0.687	0.18
	FBgn0086690	Plp	3L	15066081	15094724	-	15074324	15074492	15073306	15073330	15074683	15075847	143,123	0,0	138,113	12,11	298	149	0.000228731	0.01376	1.0,1.0	0.852,0.837	0.155
	FBgn0259111	Ndae1	2L	7223328	7249343	-	7236144	7236351	7234526	7234997	7237686	7237790	127,103	65,70	73,81	122,154	298	149	8.91233e-07	0.000131443	0.494,0.424	0.23,0.208	0.24
	FBgn0260003	Dys	3R	19461085	19597288	+	19594368	19594398	19592822	19593123	19594499	19597288	59,47	87,62	36,36	138,150	178	149	0.000131728	0.00955969	0.362,0.388	0.179,0.167	0.202
	FBgn0260794	ctrip	3R	4786284	4812096	-	4810671	4810787	4801212	4801991	4811982	4812096	37,27	62,34	6,19	128,79	264	149	3.84867e-06	0.000517533	0.252,0.309	0.026,0.12	0.207
	FBgn0261341	verm	3L	19690033	19695260	-	19692264	19692377	19691808	19691958	19692720	19692851	1141,691	227,130	466,291	234,193	261	149	1.30418e-10	5.96272e-08	0.742,0.752	0.532,0.463	0.249
	FBgn0261788	Ank2	3L	7655389	7718395	-	7666165	7693855	7663692	7665982	7696643	7696724	14,18	0,0	17,31	8,7	298	149	1.04745e-07	2.28046e-05	1.0,1.0	0.515,0.689	0.398
	FBgn0261984	Ire1	3R	19853908	19861291	-	19860646	19860761	19857240	19857684	19860885	19861291	461,366	16,6	125,123	114,102	263	149	0	0	0.942,0.972	0.383,0.406	0.563
	FBgn0263077	CG43340	2R	7623242	7651787	+	7640831	7647677	7640116	7640617	7648296	7648510	56,35	75,58	14,10	77,124	298	149	2.42473e-07	4.26379e-05	0.272,0.232	0.083,0.039	0.191
	FBgn0263077	CG43340	2R	7623242	7651787	+	7647305	7647677	7640116	7640617	7648296	7648510	96,70	75,58	24,26	77,124	298	149	3.19683e-10	1.32872e-07	0.39,0.376	0.135,0.095	0.268
	FBgn0264495	gpp	3R	6406855	6449274	+	6445534	6446072	6443821	6444310	6446459	6449274	36,46	7,14	23,26	37,36	298	149	5.8654e-07	9.57736e-05	0.72,0.622	0.237,0.265	0.42
	FBgn0287209	Gfat1	3R	4126442	4137882	+	4134145	4134172	4133463	4133919	4134366	4134390	163,85	149,96	128,79	249,193	175	149	0.000496289	0.0257845	0.482,0.43	0.304,0.258	0.175
se_down	FBgn0000289	cg	2R	14173693	14182838	+	14177174	14177477	14176611	14176691	14177860	14178021	80,92	38,25	118,102	8,14	298	149	0.000654034	0.0325026	0.513,0.648	0.881,0.785	-0.252
	FBgn0004167	kst	3L	3336860	3368133	+	3366443	3366773	3366199	3366310	3367514	3368133	320,203	224,136	441,422	168,139	298	149	0.000865299	0.0373791	0.417,0.427	0.568,0.603	-0.163
	FBgn0004167	kst	3L	3336860	3368133	+	3366443	3366962	3366199	3366310	3367514	3368133	163,120	224,136	302,260	168,139	298	149	1.66992e-05	0.00165975	0.267,0.306	0.473,0.483	-0.192
	FBgn0004167	kst	3L	3336860	3368133	+	3366443	3367010	3366199	3366310	3367514	3368133	199,155	224,136	346,296	168,139	298	149	0.000148626	0.0101421	0.308,0.363	0.507,0.516	-0.176
	FBgn0004169	up	X	13593474	13602578	-	13597380	13597404	13596375	13596748	13599415	13599457	6462,5108	3578,2465	6465,6454	1605,1430	172	149	1.24501e-07	2.42765e-05	0.61,0.642	0.777,0.796	-0.16
	FBgn0010352	Nc73EF	3L	16954822	16968724	+	16960537	16960667	16959704	16959884	16961499	16961602	167,147	140,117	493,399	218,153	278	149	0.000817528	0.0363247	0.39,0.402	0.548,0.583	-0.169
	FBgn0010905	Spn	3L	2505245	2554292	-	2509363	2509500	2508638	2508865	2511162	2511763	18,7	15,11	38,30	6,2	285	149	9.24785e-06	0.00103125	0.386,0.25	0.768,0.887	-0.51
	FBgn0013576	mtd	3R	5270116	5350443	-	5335713	5336635	5334404	5335060	5349467	5350010	1,1	12,3	10,3	3,1	298	149	1.19393e-05	0.00129968	0.04,0.143	0.625,0.6	-0.521
	FBgn0013733	shot	2R	13864237	13942110	-	13899449	13899671	13894838	13894969	13901436	13901572	151,97	54,36	292,290	38,34	298	149	3.05209e-05	0.00284778	0.583,0.574	0.793,0.81	-0.223
	FBgn0013995	Calx	3R	20978183	21015613	+	20986146	20986382	20985978	20986083	20992240	20994423	18,9	25,13	37,20	0,0	298	149	3.33067e-16	3.04556e-13	0.265,0.257	1.0,1.0	-0.739
	FBgn0016694	Pdp1	3L	7811458	7867369	-	7819987	7820029	7818068	7818223	7830386	7831827	9,9	16,16	4,1	1,0	190	149	0.000433556	0.0238822	0.306,0.306	0.758,1.0	-0.573
	FBgn0016930	Dyrk2	2L	14184478	14234126	-	14229531	14229536	14222016	14222081	14233647	14234108	40,41	38,23	55,38	9,6	153	149	0.000114891	0.00861119	0.506,0.635	0.856,0.86	-0.287
	FBgn0019660	lncRNA:roX2	X	11579065	11580432	+	11579452	11579528	11579348	11579399	11579669	11580084	92,66	374,365	75,39	105,86	224	149	0.000712397	0.0341471	0.141,0.107	0.322,0.232	-0.153
	FBgn0020278	loco	3R	22619968	22639387	-	22629552	22630606	22622123	22622906	22635644	22636456	37,19	14,11	108,101	6,12	298	149	0.000153507	0.0103211	0.569,0.463	0.9,0.808	-0.338
	FBgn0020389	Papss	3L	19845293	19860925	+	19848169	19848398	19845292	19845630	19858377	19858492	90,33	106,74	67,60	37,34	298	149	0.000818338	0.0363247	0.298,0.182	0.475,0.469	-0.232
	FBgn0026620	tacc	3R	4733654	4749056	-	4748355	4748548	4744463	4744665	4748790	4749056	22,19	105,58	162,108	126,110	298	149	2.4061e-09	8.46206e-07	0.095,0.141	0.391,0.329	-0.242
	FBgn0029728	CG2861	X	4797231	4804862	-	4803689	4803820	4803426	4803618	4804697	4804862	5,6	29,31	19,20	16,21	279	149	9.82501e-05	0.00761355	0.084,0.094	0.388,0.337	-0.274
	FBgn0030320	CG2247	X	11606290	11611652	-	11609401	11609713	11608702	11609307	11610201	11610413	93,83	26,13	132,92	5,4	298	149	0.00018412	0.0118563	0.641,0.761	0.93,0.92	-0.224
	FBgn0030778	CG4678	X	16696131	16711145	+	16710203	16710313	16709984	16710077	16710777	16711145	0,0	3,8	4,6	3,2	258	149	7.96993e-06	0.000934321	0.0,0.0	0.435,0.634	-0.534
	FBgn0033246	ACC	2R	7974115	7991862	-	7985601	7985778	7985065	7985451	7987065	7987237	8,1	34,24	4,8	3,3	298	149	0.0007275	0.0341547	0.105,0.02	0.4,0.571	-0.423
	FBgn0034194	CG15611	2R	17108844	17114360	+	17109942	17110074	17108843	17109276	17110166	17110500	86,72	36,47	110,114	6,9	280	149	6.6061e-10	2.51693e-07	0.56,0.449	0.907,0.871	-0.384
	FBgn0035049	Mmp1	2R	24671294	24688184	-	24672550	24672851	24671293	24672306	24674972	24675141	27,33	146,107	90,85	132,120	298	149	0.000169029	0.0112	0.085,0.134	0.254,0.262	-0.148
	FBgn0035049	Mmp1	2R	24671294	24688184	-	24672550	24672851	24671293	24672306	24675062	24675141	46,54	47,44	120,102	33,43	298	149	0.00086662	0.0373791	0.329,0.38	0.645,0.543	-0.24
	FBgn0035049	Mmp1	2R	24671294	24688184	-	24672550	24673316	24671293	24672306	24675062	24675141	39,45	47,44	109,98	33,43	298	149	0.000138614	0.00974234	0.293,0.338	0.623,0.533	-0.263
	FBgn0035438	PHGPx	3L	3326265	3328626	+	3327342	3327553	3326264	3326367	3327859	3328183	190,203	730,493	516,491	819,656	298	149	0.000516271	0.0262266	0.115,0.171	0.24,0.272	-0.113
	FBgn0035625	Blimp-1	3L	5630983	5652094	+	5645265	5645304	5644734	5644851	5645674	5648237	0,0	5,6	8,9	34,29	187	149	0.000732099	0.0341547	0.0,0.0	0.158,0.198	-0.178
	FBgn0036952	CG6933	3L	20218500	20220420	-	20220096	20220235	20218501	20219663	20220344	20220420	1371,890	549,325	531,491	116,53	287	149	0.000195301	0.0124016	0.565,0.587	0.704,0.828	-0.19
	FBgn0037580	DppIII	3R	8344400	8347465	+	8344808	8345023	8344399	8344483	8345092	8345399	60,43	123,71	25,26	8,14	298	149	0.000112473	0.00857047	0.196,0.232	0.61,0.481	-0.331
	FBgn0038165	Task6	3R	13667046	13674542	-	13669016	13669049	13667045	13668834	13669535	13669696	3,1	15,13	13,11	5,2	181	149	1.15385e-07	2.39791e-05	0.141,0.06	0.682,0.819	-0.65
	FBgn0039890	ABCD	4	184076	193829	-	189997	190061	188577	189248	193672	193829	61,20	18,15	38,34	0,2	212	149	3.442e-06	0.000476873	0.704,0.484	1.0,0.923	-0.368
	FBgn0041182	Tep2	2L	7693727	7701601	-	7697006	7697157	7696027	7696206	7697976	7698130	32,17	50,29	55,73	20,14	298	149	1.71749e-07	3.14095e-05	0.242,0.227	0.579,0.723	-0.417
	FBgn0041182	Tep2	2L	7693727	7701601	-	7697006	7697157	7696027	7696206	7698373	7698551	31,19	24,14	54,73	14,12	298	149	0.000480162	0.0255951	0.392,0.404	0.659,0.753	-0.308
	FBgn0043070	MESK2	2R	21502097	21517241	+	21507294	21507722	21502096	21502479	21510117	21510201	264,200	47,49	351,317	26,21	298	149	0.000199565	0.0124988	0.737,0.671	0.871,0.883	-0.173
	FBgn0043070	MESK2	2R	21502097	21517241	+	21507321	21507722	21502096	21502479	21510117	21510201	209,177	47,49	316,304	26,21	298	149	1.39969e-05	0.0014544	0.69,0.644	0.859,0.879	-0.202
	FBgn0052062	Rbfox1	3L	10481412	10594012	+	10571048	10571246	10517961	10518306	10573449	10574154	19,19	21,24	31,26	7,10	298	149	0.00117386	0.0483505	0.311,0.284	0.689,0.565	-0.33
	FBgn0052311	zormin	3L	2117466	2151700	-	2124181	2124613	2118766	2119129	2125238	2126670	114,72	102,89	439,398	187,154	298	149	4.44248e-06	0.000551728	0.358,0.288	0.54,0.564	-0.229
	FBgn0052311	zormin	3L	2117466	2151700	-	2127077	2128760	2125238	2126670	2129053	2129229	347,243	149,117	1045,825	181,169	298	149	1.50719e-06	0.00021534	0.538,0.509	0.743,0.709	-0.202
	FBgn0053208	Mical	3R	10001554	10042895	-	10037815	10037890	10027329	10027381	10041971	10041998	98,87	15,18	201,211	0,0	223	149	3.59823e-09	1.09674e-06	0.814,0.764	1.0,1.0	-0.211
	FBgn0063485	Lasp	3L	16676406	16711677	-	16678807	16679473	16678424	16678660	16680811	16680947	157,108	38,19	180,141	10,10	298	149	0.000666378	0.03276	0.674,0.74	0.9,0.876	-0.181
	FBgn0063485	Lasp	3L	16676406	16711677	-	16678807	16679869	16678424	16678660	16680811	16680947	159,71	38,19	175,137	10,10	298	149	9.57383e-05	0.00754682	0.677,0.651	0.897,0.873	-0.221
	FBgn0063485	Lasp	3L	16676406	16711677	-	16678807	16679932	16678424	16678660	16680811	16680947	207,100	38,19	204,164	10,10	298	149	0.000930396	0.0395637	0.731,0.725	0.911,0.891	-0.173
	FBgn0259244	CG42342	3R	16502770	16571363	+	16550860	16550929	16550632	16550740	16551794	16551965	93,129	20,36	25,66	0,3	217	149	3.1723e-05	0.00290075	0.761,0.711	1.0,0.938	-0.233
	FBgn0259244	CG42342	3R	16502770	16571363	+	16551613	16551667	16550632	16550740	16551794	16551965	55,78	20,36	26,69	0,3	202	149	2.89082e-08	6.95622e-06	0.67,0.615	1.0,0.944	-0.329
	FBgn0259244	CG42342	3R	16502770	16571363	+	16551613	16551667	16550860	16550929	16551794	16551965	26,29	55,72	21,51	9,35	202	149	7.30264e-05	0.00618291	0.259,0.229	0.633,0.518	-0.332
	FBgn0260003	Dys	3R	19461085	19597288	+	19593795	19594098	19592822	19593123	19594368	19594398	7,5	58,42	25,44	32,32	298	149	1.27436e-07	2.42765e-05	0.057,0.056	0.281,0.407	-0.287
	FBgn0261015	Pif1A	3R	8774286	8801176	-	8793977	8794091	8793103	8793367	8796704	8796936	132,117	155,90	339,266	120,117	262	149	7.25299e-05	0.00618291	0.326,0.425	0.616,0.564	-0.214
	FBgn0261341	verm	3L	19690033	19695260	-	19692720	19692851	19692264	19692377	19692982	19693094	179,139	1100,838	266,193	613,458	279	149	0.000140637	0.00974234	0.08,0.081	0.188,0.184	-0.105
	FBgn0261649	tinc	3R	17811541	17872507	+	17813530	17813617	17811540	17811804	17836150	17836236	89,58	11,7	47,21	0,0	235	149	0.000855104	0.0373791	0.837,0.84	1.0,1.0	-0.161
	FBgn0261649	tinc	3R	17811541	17872507	+	17821893	17821938	17811540	17811804	17836150	17836236	5,4	11,7	4,3	0,0	193	149	2.28537e-08	5.80485e-06	0.26,0.306	1.0,1.0	-0.717
	FBgn0261988	Gprk2	3R	31405245	31457873	+	31410353	31410401	31405244	31405956	31433458	31433888	42,24	186,109	300,287	34,11	196	149	0	0	0.147,0.143	0.87,0.952	-0.766
	FBgn0263120	Acsl	2R	8665813	8683022	+	8666767	8666794	8666170	8666311	8676471	8676607	1,0	6,3	3,7	1,12	175	149	0.000716999	0.0341471	0.124,0.0	0.719,0.332	-0.463
	FBgn0263346	smash	3R	4659579	4712193	+	4680778	4680837	4659578	4660399	4697190	4697542	18,4	11,5	76,38	4,0	207	149	7.80852e-07	0.000119002	0.541,0.365	0.932,1.0	-0.513
	FBgn0263346	smash	3R	4659579	4712193	+	4680778	4680837	4670796	4670850	4697190	4697542	55,40	106,111	207,162	0,1	207	149	0	0	0.272,0.206	1.0,0.991	-0.757
	FBgn0266005	lncRNA:CR44779	X	1047242	1088866	+	1082466	1087691	1047241	1047425	1088619	1088866	31,22	20,4	21,21	0,2	298	149	0.000793767	0.036291	0.437,0.733	1.0,0.84	-0.335
	FBgn0283680	IP3K2	X	13303633	13329303	+	13318414	13319047	13305514	13306947	13327347	13327597	9,15	43,34	27,25	12,19	298	149	5.75215e-05	0.00505747	0.095,0.181	0.529,0.397	-0.325
	GeneID	gene_symbol	seqnames	start	end	strand	riExonStart_0base	riExonEnd	upstreamES	upstreamEE	downstreamES	downstreamEE	IJC_SAMPLE_1	SJC_SAMPLE_1	IJC_SAMPLE_2	SJC_SAMPLE_2	IncFormLen	SkipFormLen	PValue	FDR	IncLevel1	IncLevel2	IncLevelDifference
ri_up	FBgn0004838	Hrb27C	2L	6920704	6932057	+	6924684	6932057	6924684	6925564	6927980	6932057	62,49	0,3	50,32	11,6	298	149	0.000623471	0.0231806	1.0,0.891	0.694,0.727	0.235
	FBgn0013334	Sap47	3R	15935100	15962124	+	15935118	15936340	15935118	15935584	15935830	15936340	51,27	8,0	15,12	8,13	298	149	0.000219595	0.00993246	0.761,1.0	0.484,0.316	0.481
	FBgn0015521	RpS21	2L	2856070	2857029	+	2856376	2856705	2856376	2856568	2856630	2856705	153,70	13,1	17,8	1043,964	210	149	0	0	0.893,0.98	0.011,0.006	0.928
	FBgn0016726	RpL29	2R	21293768	21294404	+	21293767	21293874	21293767	21293789	21293849	21293874	132,80	29,69	44,67	101,119	208	149	0.00107472	0.0324071	0.765,0.454	0.238,0.287	0.347
	FBgn0020379	Rfx	3R	10361760	10378068	-	10365504	10365973	10365504	10365669	10365735	10365973	7,2	3,2	0,1	12,14	214	149	1.45981e-05	0.00114449	0.619,0.41	0.0,0.047	0.491
	FBgn0028474	CG4119	X	5666052	5670652	+	5666051	5666468	5666051	5666313	5666376	5666468	28,41	17,20	17,35	49,43	211	149	0.00173649	0.0453804	0.538,0.591	0.197,0.365	0.283
	FBgn0031155	CG15446	X	21095680	21102206	-	21102022	21102206	21102022	21102051	21102130	21102206	11,10	7,8	0,0	3,11	227	149	1.20764e-08	3.55045e-06	0.508,0.451	0.0,0.0	0.48
	FBgn0031319	CG4896	2L	1177690	1182454	+	1179996	1180449	1179996	1180123	1180212	1180449	10,11	10,11	6,2	30,14	237	149	0.00207383	0.0497719	0.386,0.386	0.112,0.082	0.289
	FBgn0031515	CG9664	2L	3291245	3294706	-	3292173	3292576	3292173	3292298	3292459	3292576	7,7	0,1	8,7	18,15	298	149	6.31668e-07	0.000114718	1.0,0.778	0.182,0.189	0.704
	FBgn0037297	CG1116	3R	5219657	5221548	+	5220748	5221548	5220748	5221325	5221391	5221548	30,24	1,8	2,5	9,8	214	149	1.85265e-05	0.0013617	0.954,0.676	0.134,0.303	0.596
	FBgn0039186	CG5746	3R	24343895	24348791	-	24348146	24348791	24348146	24348563	24348661	24348791	12,4	13,2	0,1	4,10	246	149	2.85913e-05	0.00197785	0.359,0.548	0.0,0.057	0.425
	FBgn0051477	ATPsynepsilonL	3R	10121773	10122320	+	10121772	10121946	10121772	10121805	10121871	10121946	27,13	0,5	2,4	13,9	214	149	1.18846e-06	0.000174704	1.0,0.644	0.097,0.236	0.656
	FBgn0261439	SdhA	2R	19391863	19395971	-	19395686	19395971	19395686	19395777	19395910	19395971	86,80	27,21	65,50	62,52	281	149	4.38244e-06	0.000429479	0.628,0.669	0.357,0.338	0.301
	FBgn0261822	Bsg	2L	8083420	8116531	+	8107747	8116531	8107747	8107880	8110480	8116531	101,49	0,2	64,53	8,8	298	149	0.0004923	0.0199636	1.0,0.925	0.8,0.768	0.178
	FBgn0262527	nsl1	3R	15793782	15802102	+	15798086	15799036	15798086	15798404	15798723	15799036	38,9	10,3	14,22	19,22	298	149	0.00114949	0.0329708	0.655,0.6	0.269,0.333	0.326
	FBgn0263507	lncRNA:CR43496	X	6758610	6759491	-	6758609	6759491	6758609	6758953	6759424	6759491	27,17	0,0	6,18	5,6	298	149	5.94596e-07	0.000114718	1.0,1.0	0.375,0.6	0.512
	FBgn0266410	CG45050	3R	9340216	9362994	+	9358255	9362994	9358255	9358571	9358628	9362994	13,14	5,4	16,9	20,26	205	149	0.0008395	0.0274237	0.654,0.718	0.368,0.201	0.401
ri_down	FBgn0000289	cg	2R	14173693	14182838	+	14173692	14174572	14173692	14174269	14174461	14174572	49,36	10,6	60,65	1,2	298	149	0.00086513	0.0274971	0.71,0.75	0.968,0.942	-0.225
	FBgn0001987	Gli	2L	15756002	15762758	-	15762195	15762758	15762195	15762406	15762568	15762758	0,5	6,8	7,2	1,0	298	149	1.12799e-05	0.000978046	0.0,0.238	0.778,1.0	-0.77
	FBgn0004435	Galphaq	2R	12612740	12623197	+	12615906	12616414	12615906	12616081	12616162	12616414	24,10	22,19	40,25	15,4	229	149	0.0017764	0.045414	0.415,0.255	0.634,0.803	-0.384
	FBgn0010548	Aldh-III	2R	7466879	7477162	-	7473721	7474130	7473721	7473843	7473915	7474130	23,21	11,12	46,43	6,2	220	149	0.000305434	0.0128282	0.586,0.542	0.839,0.936	-0.323
	FBgn0015756	RpL9	2L	11002758	11004189	-	11004005	11004153	11004005	11004055	11004128	11004153	355,147	942,401	301,137	327,195	221	149	5.39604e-05	0.00333986	0.203,0.198	0.383,0.321	-0.151
	FBgn0030098	CG12057	X	9191657	9192548	+	9191656	9192548	9191656	9192344	9192436	9192548	18,17	7,5	17,26	0,0	240	149	2.37718e-06	0.000279556	0.615,0.679	1.0,1.0	-0.353
	FBgn0030503	Tango2	X	13616989	13619207	+	13616988	13617575	13616988	13617106	13617177	13617575	7,3	7,11	4,3	1,0	219	149	0.00014956	0.00762811	0.405,0.157	0.731,1.0	-0.584
	FBgn0035850	Atg18a	3L	8186857	8191118	+	8186994	8187576	8186994	8187402	8187478	8187576	4,5	13,16	10,20	3,7	224	149	1.16434e-05	0.000978046	0.17,0.172	0.689,0.655	-0.501
	FBgn0036945	Ssk	3L	20188522	20189779	+	20188521	20188762	20188521	20188614	20188675	20188762	24,11	100,58	23,18	26,27	209	149	0.00126835	0.0346878	0.146,0.119	0.387,0.322	-0.222
	FBgn0036992	Hpd	3L	20438166	20439872	-	20439527	20439872	20439527	20439554	20439771	20439872	5,13	34,12	10,10	2,2	298	149	0.000155676	0.00762811	0.068,0.351	0.714,0.714	-0.504
	FBgn0037040	CG12983	3L	20962655	20966762	-	20965809	20966063	20965809	20965911	20965977	20966063	2,2	11,9	7,1	1,0	214	149	1.73075e-06	0.000226151	0.112,0.134	0.83,1.0	-0.792
	FBgn0037986	CG14736	3R	12040528	12043453	+	12041664	12042100	12041664	12041962	12042016	12042100	6,4	11,5	1,1	0,0	202	149	3.36398e-14	1.97802e-11	0.287,0.371	1.0,1.0	-0.671
	FBgn0039904	Hcf	4	359938	375554	+	365673	366762	365673	365805	365859	366762	21,12	15,14	48,9	7,3	202	149	0.00167054	0.044649	0.508,0.387	0.835,0.689	-0.315
	FBgn0263611	lncRNA:CR43620	2L	19978829	19979723	+	19978828	19979723	19978828	19979043	19979105	19979723	1,1	9,6	3,9	3,0	210	149	0.000278727	0.0121401	0.073,0.106	0.415,1.0	-0.618
	GeneID	gene_symbol	seqnames	start	end	strand	longExonStart_0base	longExonEnd	shortES	shortEE	flankingES	flankingEE	IJC_SAMPLE_1	SJC_SAMPLE_1	IJC_SAMPLE_2	SJC_SAMPLE_2	IncFormLen	SkipFormLen	PValue	FDR	IncLevel1	IncLevel2	IncLevelDifference
a5ss_up	FBgn0001987	Gli	2L	15756002	15762758	-	15762195	15762758	15762688	15762758	15760401	15760574	41,58	79,60	8,6	51,47	298	149	7.39161e-05	0.00479188	0.206,0.326	0.073,0.06	0.2
	FBgn0004169	up	X	13593474	13602578	-	13596375	13596748	13596378	13596748	13595319	13595538	20591,15343	1385,973	14069,12880	2486,2377	151	149	1.29526e-05	0.00136638	0.936,0.94	0.848,0.842	0.093
	FBgn0004657	mys	X	8061645	8070237	+	8061644	8061870	8061644	8061725	8063839	8064459	76,75	40,22	18,21	133,101	293	149	0	0	0.491,0.634	0.064,0.096	0.482
	FBgn0004657	mys	X	8061645	8070237	+	8061644	8062080	8061644	8061725	8063839	8064459	27,13	40,22	13,7	133,101	298	149	5.96225e-06	0.00095782	0.252,0.228	0.047,0.033	0.2
	FBgn0004893	bowl	2L	3771700	3784121	+	3771699	3771784	3771699	3771754	3772460	3772694	11,5	0,0	99,98	13,13	178	149	0.000820823	0.033258	1.0,1.0	0.864,0.863	0.137
	FBgn0011224	heph	3R	31846987	32015520	-	31985510	31985768	31985711	31985768	31975447	31975565	2,10	0,1	2,3	11,1	298	149	5.79599e-05	0.00398518	1.0,0.833	0.083,0.6	0.575
	FBgn0027786	Mtch	3L	184626	186310	+	184625	184681	184625	184669	184774	185074	5,8	2,4	4,1	11,8	160	149	0.00129889	0.0427128	0.7,0.651	0.253,0.104	0.497
	FBgn0028504	CG12182	3L	2595842	2599579	-	2599124	2599579	2599264	2599579	2597193	2599070	5,7	2,6	0,0	10,14	288	149	1.01823e-05	0.00115519	0.564,0.376	0.0,0.0	0.47
	FBgn0029971	ND-MNLL	X	7893053	7893798	-	7893587	7893798	7893749	7893798	7893052	7893490	29,10	39,49	5,3	79,86	298	149	0.00119808	0.041029	0.271,0.093	0.031,0.017	0.158
	FBgn0030693	CG8974	X	15793721	15796028	-	15795809	15796028	15796001	15796028	15794496	15795101	8,17	8,7	5,2	25,10	298	149	0.000584212	0.0254918	0.333,0.548	0.091,0.091	0.35
	FBgn0030735	CG3632	X	16296671	16303308	+	16296670	16296883	16296670	16296790	16297660	16297784	15,7	3,3	2,0	6,6	241	149	6.7602e-06	0.000958681	0.756,0.591	0.171,0.0	0.588
	FBgn0031016	kek5	X	19353181	19471914	+	19353180	19353653	19353180	19353583	19362966	19363021	161,192	22,14	265,246	60,93	218	149	0.000917411	0.0341247	0.833,0.904	0.751,0.644	0.171
	FBgn0031769	CG9135	2L	6050800	6053877	+	6050838	6051067	6050838	6050921	6051616	6052022	1,2	0,0	6,4	174,107	294	149	8.09552e-06	0.00102049	1.0,1.0	0.017,0.019	0.982
	FBgn0032075	Tsp29Fb	2L	8937390	8939743	+	8937389	8937448	8937389	8937405	8937519	8937631	115,83	46,29	27,14	31,22	191	149	9.86106e-05	0.00604723	0.661,0.691	0.405,0.332	0.307
	FBgn0034885	Eglp4	2R	23607592	23614710	-	23614466	23614710	23614672	23614710	23608131	23608681	10,5	3,2	3,2	34,25	298	149	2.37175e-07	7.68785e-05	0.625,0.556	0.042,0.038	0.55
	FBgn0034885	Eglp4	2R	23607592	23614710	-	23614592	23614710	23614672	23614710	23608131	23608681	11,4	3,2	1,5	34,25	228	149	5.15789e-07	0.000106393	0.706,0.567	0.019,0.116	0.569
	FBgn0035612	frm	3L	5538411	5551159	-	5551099	5551159	5551127	5551159	5550783	5550911	63,60	58,38	45,49	110,116	176	149	2.80204e-05	0.00235475	0.479,0.572	0.257,0.263	0.265
	FBgn0035734	CG14823	3L	7066314	7069463	+	7066313	7066967	7066313	7066726	7067554	7067779	8,7	13,12	0,0	4,3	298	149	0.000205248	0.0113587	0.235,0.226	0.0,0.0	0.23
	FBgn0040551	CG11686	3R	13260356	13262227	+	13260355	13260486	13260355	13260418	13261604	13261770	75,67	65,55	31,21	82,63	216	149	9.70884e-06	0.00115519	0.443,0.457	0.207,0.187	0.253
	FBgn0040660	CG13551	2R	23377866	23383424	-	23383319	23383424	23383364	23383424	23383047	23383122	346,137	125,94	26,85	30,137	193	149	0.000215364	0.0116348	0.681,0.529	0.401,0.324	0.242
	FBgn0040859	lncRNA:CR32658	X	12091264	12092272	+	12091805	12092083	12091805	12092070	12092142	12092272	15,8	32,32	2,1	26,38	161	149	0.0007538	0.0310977	0.303,0.188	0.066,0.024	0.201
	FBgn0051038	CG31038	3R	29877059	29903231	+	29896697	29897229	29896697	29897205	29897299	29897645	17,14	2,0	4,10	6,6	172	149	0.000128373	0.00766521	0.88,1.0	0.366,0.591	0.461
	FBgn0052529	Hers	X	19866146	19908108	+	19887352	19887492	19887352	19887413	19899011	19899972	12,16	0,1	12,23	2,12	227	149	0.000285947	0.0141047	1.0,0.913	0.798,0.557	0.279
	FBgn0262527	nsl1	3R	15793782	15802102	+	15798086	15798477	15798086	15798404	15798723	15799036	21,24	10,3	9,17	19,22	221	149	0.00104309	0.0372176	0.586,0.844	0.242,0.343	0.422
	FBgn0283508	nw	2R	17502354	17508645	+	17506157	17506745	17506157	17506310	17507443	17508645	130,101	118,105	88,74	197,152	298	149	0.00121152	0.041029	0.355,0.325	0.183,0.196	0.15
a5ss_down	FBgn0030051	spirit	X	8571099	8573593	-	8573528	8573593	8573561	8573593	8572827	8572999	1,0	10,12	5,4	7,4	181	149	0.000141278	0.00801398	0.076,0.0	0.37,0.452	-0.373
	FBgn0030674	HUWE1	X	15712628	15731935	+	15713900	15714393	15713900	15714381	15714716	15714956	23,28	197,173	80,60	134,113	160	149	2.3751e-08	1.07782e-05	0.098,0.131	0.357,0.331	-0.229
	FBgn0030735	CG3632	X	16296671	16303308	+	16296670	16296907	16296670	16296883	16297660	16297784	18,9	15,7	11,7	2,0	172	149	0.000581017	0.0254918	0.51,0.527	0.827,1.0	-0.395
	FBgn0030897	Frq1	X	18155369	18174744	+	18155368	18155594	18155368	18155590	18161012	18161292	2,3	6,7	4,2	1,0	152	149	6.15796e-05	0.00410953	0.246,0.296	0.797,1.0	-0.628
	FBgn0031596	CG15429	2L	4352975	4354034	+	4352974	4353195	4352974	4353193	4353249	4353615	6,7	2,11	1,2	0,0	150	149	4.49928e-05	0.00329319	0.749,0.387	1.0,1.0	-0.432
	FBgn0036967	SCCRO4	3L	20299410	20309511	+	20302430	20302837	20302430	20302502	20303066	20303115	4,8	57,31	19,21	33,13	298	149	0.000651445	0.0278892	0.034,0.114	0.224,0.447	-0.262
	FBgn0037117	CG11248	3L	21680050	21683231	+	21680049	21680232	21680049	21680223	21680299	21682433	2,5	20,14	8,9	4,4	157	149	9.56369e-05	0.00602778	0.087,0.253	0.655,0.681	-0.498
	FBgn0037130	Syn1	3L	21745359	21770534	-	21769917	21770534	21770445	21770534	21760957	21761265	41,18	5,6	27,117	0,1	298	149	0.000350597	0.0169256	0.804,0.6	1.0,0.983	-0.29
	FBgn0037138	P5CDh1	3L	21836665	21841356	-	21840050	21840127	21840098	21840127	21839665	21839831	2,3	4,7	8,1	0,0	196	149	5.69044e-09	4.30387e-06	0.275,0.246	1.0,1.0	-0.74
	FBgn0243516	Vrp1	2R	22106107	22122562	-	22116150	22116342	22116164	22116342	22112209	22112588	31,20	14,6	16,19	0,2	162	149	0.00086317	0.0335277	0.671,0.754	1.0,0.897	-0.236
	FBgn0259984	kuz	2L	13550139	13639411	+	13550138	13550420	13550138	13550293	13551141	13551666	174,140	133,102	93,91	27,28	275	149	0.000258798	0.0133458	0.415,0.426	0.651,0.638	-0.224
	FBgn0261836	Msp300	2L	5100877	5207002	+	5125827	5139015	5125827	5127057	5139358	5139673	227,151	44,40	351,335	20,15	298	149	3.4472e-07	8.69077e-05	0.721,0.654	0.898,0.918	-0.221
	FBgn0262532	CR43086	3L	17868740	17870573	+	17869615	17870019	17869615	17870007	17870078	17870573	0,0	10,3	4,2	0,0	160	149	1.03704e-11	1.17652e-08	0.0,0.0	1.0,1.0	-1
	FBgn0265045	Strn-Mlck	2R	15946933	15989498	-	15951871	15952088	15951906	15952088	15951157	15951466	15,16	22,14	64,34	14,5	183	149	1.57128e-05	0.00152836	0.357,0.482	0.788,0.847	-0.398
	FBgn0267001	Ten-a	X	12043698	12335214	+	12203797	12203984	12203797	12203978	12204138	12204409	0,0	8,5	4,3	2,2	154	149	4.41143e-06	0.000769964	0.0,0.0	0.659,0.592	-0.625
	GeneID	gene_symbol	seqnames	start	end	strand	longExonStart_0base	longExonEnd	shortES	shortEE	flankingES	flankingEE	IJC_SAMPLE_1	SJC_SAMPLE_1	IJC_SAMPLE_2	SJC_SAMPLE_2	IncFormLen	SkipFormLen	PValue	FDR	IncLevel1	IncLevel2	IncLevelDifference
a3ss_up	FBgn0011224	heph	3R	31846987	32015520	-	31975447	31975965	31975447	31975565	31985711	31985768	10,3	0,1	14,1	11,1	298	149	0.000308518	0.0303049	1.0,0.6	0.389,0.333	0.439
	FBgn0015222	Fer1HCH	3R	30385573	30388178	-	30387463	30387602	30387463	30387550	30387774	30387860	3516,2484	300,197	347,311	212,140	200	149	0	0	0.897,0.904	0.549,0.623	0.315
	FBgn0015222	Fer1HCH	3R	30385573	30388178	-	30387463	30387642	30387463	30387550	30387774	30387860	3667,2552	300,197	364,327	212,140	240	149	0	0	0.884,0.889	0.516,0.592	0.333
	FBgn0028407	Drep3	2R	12055089	12062866	+	12055968	12056386	12055973	12056386	12055088	12055218	2,7	4,4	1,0	11,11	153	149	5.96806e-05	0.00806061	0.327,0.63	0.081,0.0	0.438
	FBgn0028952	Kebab	2L	2045494	2048054	+	2046065	2046218	2046068	2046218	2045699	2046011	11,12	0,0	8,4	7,14	151	149	6.89915e-11	2.48484e-08	1.0,1.0	0.53,0.22	0.625
	FBgn0031187	Usp2	X	22455803	22470146	+	22462399	22463272	22462713	22463272	22457613	22458260	24,28	0,0	57,53	13,17	298	149	9.50334e-08	2.28186e-05	1.0,1.0	0.687,0.609	0.352
	FBgn0031515	CG9664	2L	3291245	3294706	-	3292173	3292301	3292173	3292298	3292459	3292576	52,50	0,1	55,65	18,15	151	149	5.56126e-07	0.000109254	1.0,0.98	0.751,0.81	0.21
	FBgn0033373	CG8080	2R	9089774	9092893	-	9090810	9091051	9090810	9091039	9091406	9091653	119,106	18,25	117,90	71,41	160	149	0.000368096	0.0345851	0.86,0.798	0.605,0.672	0.19
	FBgn0036493	CG7255	3L	15304255	15311195	+	15305550	15305679	15305570	15305679	15305297	15305486	60,32	21,19	0,0	16,5	168	149	3.45335e-12	1.49254e-09	0.717,0.599	0.0,0.0	0.658
	FBgn0262872	milt	2L	7037823	7056010	+	7046253	7047214	7046319	7047214	7042358	7042512	440,289	46,25	83,52	51,40	214	149	1.11022e-15	7.99731e-13	0.869,0.889	0.531,0.475	0.376
a3ss_down	FBgn0016754	sba	3R	23894174	23922973	-	23921517	23921780	23921517	23921709	23922895	23922973	0,0	14,9	9,8	7,9	219	149	7.97638e-09	2.15462e-06	0.0,0.0	0.467,0.377	-0.422
	FBgn0036101	NijA	3L	10694360	10696877	-	10695023	10695415	10695023	10695367	10695628	10695704	75,105	14,20	112,113	5,2	196	149	0.00047282	0.0408706	0.803,0.8	0.945,0.977	-0.159
	FBgn0038716	CG7342	3R	19603375	19606475	+	19603778	19604256	19603833	19604256	19603374	19603412	4,0	9,6	61,50	21,27	203	149	0.000181018	0.019559	0.246,0.0	0.681,0.576	-0.506
	FBgn0263077	CG43340	2R	7623242	7651787	+	7638052	7638372	7638119	7638372	7636894	7637193	2,3	12,7	11,12	3,5	215	149	7.96173e-05	0.0095585	0.104,0.229	0.718,0.625	-0.505
	FBgn0263219	Dscam4	3L	8238647	8282398	+	8275986	8276502	8276004	8276502	8275504	8275667	0,1	7,4	5,6	11,2	166	149	0.000591904	0.0491963	0.0,0.183	0.29,0.729	-0.418
	FBgn0265991	Zasp52	2R	15762565	15817004	-	15765122	15765447	15765122	15765252	15773815	15773966	6,3	31,40	8,17	10,19	298	149	0.000403358	0.036319	0.088,0.036	0.286,0.309	-0.235
	FBgn0267376	SelR	3R	10863355	10868642	-	10866808	10866976	10866808	10866960	10868438	10868642	46,16	28,21	50,50	0,1	164	149	7.59059e-13	4.10082e-10	0.599,0.409	1.0,0.978	-0.485
	GeneID	gene_symbol	seqnames	start	end	strand	X1stExonStart_0base	X1stExonEnd	X2ndExonStart_0base	X2ndExonEnd	upstreamES	upstreamEE	downstreamES	downstreamEE	IJC_SAMPLE_1	SJC_SAMPLE_1	IJC_SAMPLE_2	SJC_SAMPLE_2	IncFormLen	SkipFormLen	PValue	FDR	IncLevel1	IncLevel2	IncLevelDifference
mxe_up	FBgn0000308	chic	2L	5972115	5981018	-	5976610	5976782	5979411	5979704	5972899	5973674	5979939	5980101	6351,3519	1479,1383	5645,4376	3920,3306	298	298	3.97664e-07	1.57148e-05	0.811,0.718	0.59,0.57	0.184
	FBgn0001316	klar	3L	434083	540614	-	507974	508799	514611	514705	506104	506356	539898	540614	237,160	149,119	111,76	190,147	242	298	5.4329e-07	2.07293e-05	0.662,0.623	0.418,0.389	0.239
	FBgn0002921	Atpalpha	3R	20948714	20976239	+	20960725	20960825	20962214	20962295	20948779	20948829	20963724	20963856	185,141	274,164	116,78	315,202	248	229	0.00165888	0.0223352	0.384,0.443	0.254,0.263	0.155
	FBgn0003862	trx	3R	14263358	14286903	-	14276305	14277542	14279092	14279541	14274191	14275368	14286208	14286903	81,66	103,102	56,44	201,207	298	298	5.12753e-06	0.000164452	0.44,0.393	0.218,0.175	0.22
	FBgn0015609	CadN	2L	17647053	17778340	-	17714305	17714496	17715722	17715913	17711219	17711409	17717842	17718034	29,16	32,18	41,24	124,77	298	298	0.00322428	0.0378926	0.475,0.471	0.248,0.238	0.23
	FBgn0020503	CLIP-190	2L	17384700	17409698	+	17401515	17401581	17402374	17402485	17401112	17401290	17404729	17404840	165,115	63,58	78,63	82,51	214	259	0.00400153	0.0429873	0.76,0.706	0.535,0.599	0.166
	FBgn0031883	Caper	2L	7032721	7037878	+	7034198	7034273	7034764	7034910	7032720	7033018	7035406	7035561	35,22	3,3	24,22	18,8	223	294	0.00341746	0.039596	0.939,0.906	0.637,0.784	0.212
	FBgn0032456	MRP	2L	12719045	12766546	+	12728577	12728798	12730842	12731066	12726745	12727116	12737958	12738176	10,6	42,22	0,2	38,29	298	298	0.00210398	0.0270704	0.192,0.214	0.0,0.065	0.171
	FBgn0032456	MRP	2L	12719045	12766546	+	12728577	12728798	12737397	12737618	12726745	12727116	12737958	12738176	10,6	27,19	0,2	18,25	298	298	0.00117934	0.0170581	0.27,0.24	0.0,0.074	0.218
	FBgn0032456	MRP	2L	12719045	12766546	+	12729184	12729405	12729930	12730151	12726745	12727116	12737958	12738176	49,31	80,34	12,8	86,46	298	298	6.22458e-06	0.000196655	0.38,0.477	0.122,0.148	0.293
	FBgn0032456	MRP	2L	12719045	12766546	+	12729184	12729405	12730842	12731066	12726745	12727116	12737958	12738176	49,31	42,22	12,8	38,29	298	298	3.65683e-05	0.000940997	0.538,0.585	0.24,0.216	0.334
	FBgn0032456	MRP	2L	12719045	12766546	+	12729184	12729405	12737397	12737618	12726745	12727116	12737958	12738176	49,31	27,19	12,8	18,25	298	298	0.00183341	0.0239104	0.645,0.62	0.4,0.242	0.312
	FBgn0033159	Dscam1	2R	7317924	7381899	-	7335715	7336003	7345484	7345775	7332260	7332380	7347848	7348010	32,16	29,14	18,20	55,42	298	298	0.0047185	0.0483428	0.525,0.533	0.247,0.323	0.244
	FBgn0033159	Dscam1	2R	7317924	7381899	-	7350157	7350281	7350580	7350704	7348130	7348975	7361717	7361867	6,5	0,0	12,11	6,5	272	272	4.1241e-05	0.00103712	1.0,1.0	0.667,0.688	0.323
	FBgn0033159	Dscam1	2R	7317924	7381899	-	7350157	7350281	7350781	7350905	7348130	7348975	7361717	7361867	2,2	0,0	0,2	6,5	272	272	3.53462e-11	4.34562e-09	1.0,1.0	0.0,0.286	0.857
	FBgn0033159	Dscam1	2R	7317924	7381899	-	7350157	7350281	7350957	7351081	7348130	7348975	7361717	7361867	4,2	0,0	0,1	6,5	272	272	4.03011e-14	8.10785e-12	1.0,1.0	0.0,0.167	0.916
	FBgn0033159	Dscam1	2R	7317924	7381899	-	7350157	7350281	7351915	7352039	7348130	7348975	7361717	7361867	1,7	0,0	4,4	6,5	272	272	3.076e-08	2.02209e-06	1.0,1.0	0.4,0.444	0.578
	FBgn0033159	Dscam1	2R	7317924	7381899	-	7350157	7350281	7353815	7353936	7348130	7348975	7361717	7361867	1,2	0,0	4,2	6,5	269	272	5.89673e-09	5.01903e-07	1.0,1.0	0.403,0.288	0.654
	FBgn0033159	Dscam1	2R	7317924	7381899	-	7350157	7350281	7354276	7354400	7348130	7348975	7361717	7361867	2,1	0,0	3,3	6,5	272	272	4.92937e-08	2.87071e-06	1.0,1.0	0.333,0.375	0.646
	FBgn0033159	Dscam1	2R	7317924	7381899	-	7350157	7350281	7355086	7355210	7348130	7348975	7361717	7361867	4,1	0,0	5,4	6,5	272	272	6.73338e-08	3.63438e-06	1.0,1.0	0.455,0.444	0.55
	FBgn0033159	Dscam1	2R	7317924	7381899	-	7350157	7350281	7355290	7355414	7348130	7348975	7361717	7361867	2,1	0,0	4,3	6,5	272	272	1.58867e-08	1.13411e-06	1.0,1.0	0.4,0.375	0.613
	FBgn0033159	Dscam1	2R	7317924	7381899	-	7350157	7350281	7356106	7356230	7348130	7348975	7361717	7361867	1,2	0,0	2,0	6,5	272	272	1.63694e-11	2.1309e-09	1.0,1.0	0.25,0.0	0.875
	FBgn0033159	Dscam1	2R	7317924	7381899	-	7350157	7350281	7356972	7357096	7348130	7348975	7361717	7361867	2,1	0,0	5,0	6,5	272	272	3.41744e-07	1.42694e-05	1.0,1.0	0.455,0.0	0.772
	FBgn0033159	Dscam1	2R	7317924	7381899	-	7350157	7350281	7357182	7357306	7348130	7348975	7361717	7361867	2,5	0,0	6,1	6,5	272	272	3.83093e-07	1.54143e-05	1.0,1.0	0.5,0.167	0.666
	FBgn0033159	Dscam1	2R	7317924	7381899	-	7350157	7350281	7357590	7357714	7348130	7348975	7361717	7361867	2,3	0,0	7,0	6,5	272	272	6.34947e-06	0.000196655	1.0,1.0	0.538,0.0	0.731
	FBgn0033159	Dscam1	2R	7317924	7381899	-	7350157	7350281	7357788	7357915	7348130	7348975	7361717	7361867	6,1	0,0	2,0	6,5	275	272	1.38302e-11	1.91288e-09	1.0,1.0	0.248,0.0	0.876
	FBgn0033159	Dscam1	2R	7317924	7381899	-	7350157	7350281	7358002	7358129	7348130	7348975	7361717	7361867	2,1	0,0	4,4	6,5	275	272	3.06419e-08	2.02209e-06	1.0,1.0	0.397,0.442	0.581
	FBgn0033159	Dscam1	2R	7317924	7381899	-	7350157	7350281	7358603	7358727	7348130	7348975	7361717	7361867	6,5	0,0	0,3	6,5	272	272	4.56059e-09	4.38808e-07	1.0,1.0	0.0,0.375	0.813
	FBgn0033159	Dscam1	2R	7317924	7381899	-	7350157	7350281	7359441	7359565	7348130	7348975	7361717	7361867	4,2	0,0	15,7	6,5	272	272	5.56912e-05	0.00136938	1.0,1.0	0.714,0.583	0.352
	FBgn0033159	Dscam1	2R	7317924	7381899	-	7350157	7350281	7359874	7360007	7348130	7348975	7361717	7361867	3,7	0,0	3,2	6,5	281	272	1.15677e-08	9.48125e-07	1.0,1.0	0.326,0.279	0.698
	FBgn0033159	Dscam1	2R	7317924	7381899	-	7350157	7350281	7360081	7360205	7348130	7348975	7361717	7361867	3,4	0,0	4,2	6,5	272	272	5.16647e-09	4.58294e-07	1.0,1.0	0.4,0.286	0.657
	FBgn0033159	Dscam1	2R	7317924	7381899	-	7350157	7350281	7360290	7360414	7348130	7348975	7361717	7361867	5,1	0,0	4,2	6,5	272	272	5.1773e-09	4.58294e-07	1.0,1.0	0.4,0.286	0.657
	FBgn0033159	Dscam1	2R	7317924	7381899	-	7350157	7350281	7360525	7360649	7348130	7348975	7361717	7361867	4,1	0,0	6,5	6,5	272	272	2.47345e-07	1.05264e-05	1.0,1.0	0.5,0.5	0.5
	FBgn0033159	Dscam1	2R	7317924	7381899	-	7350580	7350704	7358603	7358727	7348130	7348975	7361717	7361867	6,5	6,5	0,3	12,11	272	272	0.00254051	0.0315328	0.5,0.5	0.0,0.214	0.393
	FBgn0033159	Dscam1	2R	7317924	7381899	-	7354685	7354809	7355086	7355210	7348130	7348975	7361717	7361867	4,1	0,0	5,4	10,9	272	272	7.15639e-08	3.70586e-06	1.0,1.0	0.333,0.308	0.679
	FBgn0033159	Dscam1	2R	7317924	7381899	-	7354685	7354809	7355290	7355414	7348130	7348975	7361717	7361867	2,1	0,0	4,3	10,9	272	272	2.00834e-07	8.88893e-06	1.0,1.0	0.286,0.25	0.732
	FBgn0033159	Dscam1	2R	7317924	7381899	-	7354685	7354809	7356106	7356230	7348130	7348975	7361717	7361867	1,2	0,0	2,0	10,9	272	272	0	0	1.0,1.0	0.167,0.0	0.916
	FBgn0033159	Dscam1	2R	7317924	7381899	-	7354685	7354809	7356972	7357096	7348130	7348975	7361717	7361867	2,1	0,0	5,0	10,9	272	272	2.77001e-13	4.08668e-11	1.0,1.0	0.333,0.0	0.834
	FBgn0033159	Dscam1	2R	7317924	7381899	-	7354685	7354809	7357182	7357306	7348130	7348975	7361717	7361867	2,5	0,0	6,1	10,9	272	272	2.28373e-13	3.88761e-11	1.0,1.0	0.375,0.1	0.762
	FBgn0033159	Dscam1	2R	7317924	7381899	-	7354685	7354809	7357590	7357714	7348130	7348975	7361717	7361867	2,3	0,0	7,0	10,9	272	272	1.52001e-10	1.77041e-08	1.0,1.0	0.412,0.0	0.794
	FBgn0033159	Dscam1	2R	7317924	7381899	-	7354685	7354809	7357788	7357915	7348130	7348975	7361717	7361867	6,1	0,0	2,0	10,9	275	272	0	0	1.0,1.0	0.165,0.0	0.917
	FBgn0033159	Dscam1	2R	7317924	7381899	-	7354685	7354809	7358002	7358129	7348130	7348975	7361717	7361867	2,1	0,0	4,4	10,9	275	272	2.05263e-07	8.90682e-06	1.0,1.0	0.283,0.305	0.706
	FBgn0033159	Dscam1	2R	7317924	7381899	-	7354685	7354809	7358603	7358727	7348130	7348975	7361717	7361867	6,5	0,0	0,3	10,9	272	272	0	0	1.0,1.0	0.0,0.25	0.875
	FBgn0033159	Dscam1	2R	7317924	7381899	-	7354685	7354809	7359441	7359565	7348130	7348975	7361717	7361867	4,2	0,0	15,7	10,9	272	272	1.90373e-10	2.10648e-08	1.0,1.0	0.6,0.438	0.481
	FBgn0033159	Dscam1	2R	7317924	7381899	-	7354685	7354809	7359874	7360007	7348130	7348975	7361717	7361867	3,7	0,0	3,2	10,9	281	272	1.06946e-09	1.127e-07	1.0,1.0	0.225,0.177	0.799
	FBgn0033159	Dscam1	2R	7317924	7381899	-	7354685	7354809	7360081	7360205	7348130	7348975	7361717	7361867	3,4	0,0	4,2	10,9	272	272	1.9762e-14	5.15954e-12	1.0,1.0	0.286,0.182	0.766
	FBgn0033159	Dscam1	2R	7317924	7381899	-	7354685	7354809	7360290	7360414	7348130	7348975	7361717	7361867	5,1	0,0	4,2	10,9	272	272	2.44249e-14	5.40523e-12	1.0,1.0	0.286,0.182	0.766
	FBgn0033159	Dscam1	2R	7317924	7381899	-	7354685	7354809	7360525	7360649	7348130	7348975	7361717	7361867	4,1	0,0	6,5	10,9	272	272	8.0571e-08	4.05236e-06	1.0,1.0	0.375,0.357	0.634
	FBgn0033159	Dscam1	2R	7317924	7381899	-	7355685	7355809	7357788	7357915	7348130	7348975	7361717	7361867	6,1	3,0	2,0	5,6	275	272	0.00126969	0.0181279	0.664,1.0	0.283,0.0	0.691
	FBgn0033159	Dscam1	2R	7317924	7381899	-	7355685	7355809	7358603	7358727	7348130	7348975	7361717	7361867	6,5	3,0	0,3	5,6	272	272	0.00111253	0.0164135	0.667,1.0	0.0,0.333	0.667
	FBgn0033159	Dscam1	2R	7317924	7381899	-	7356316	7356440	7357788	7357915	7348130	7348975	7361717	7361867	6,1	0,2	2,0	6,7	275	272	0.000968719	0.0148873	1.0,0.331	0.248,0.0	0.541
	FBgn0033159	Dscam1	2R	7317924	7381899	-	7356316	7356440	7358603	7358727	7348130	7348975	7361717	7361867	6,5	0,2	0,3	6,7	272	272	3.43892e-05	0.000895333	1.0,0.714	0.0,0.3	0.707
	FBgn0033159	Dscam1	2R	7317924	7381899	-	7356316	7356440	7359874	7360007	7348130	7348975	7361717	7361867	3,7	0,2	3,2	6,7	281	272	0.000256253	0.00501847	1.0,0.772	0.326,0.217	0.615
	FBgn0033159	Dscam1	2R	7317924	7381899	-	7356316	7356440	7360081	7360205	7348130	7348975	7361717	7361867	3,4	0,2	4,2	6,7	272	272	0.00373897	0.0413717	1.0,0.667	0.4,0.222	0.522
	FBgn0033159	Dscam1	2R	7317924	7381899	-	7358215	7358339	7358603	7358727	7348130	7348975	7361717	7361867	6,5	3,0	0,3	13,7	272	272	5.43583e-05	0.00135163	0.667,1.0	0.0,0.3	0.683
	FBgn0033159	Dscam1	2R	7317924	7381899	-	7358215	7358339	7359874	7360007	7348130	7348975	7361717	7361867	3,7	3,0	3,2	13,7	281	272	0.00185955	0.0240654	0.492,1.0	0.183,0.217	0.546
	FBgn0033159	Dscam1	2R	7317924	7381899	-	7363331	7363490	7363880	7364048	7361717	7361867	7368387	7368732	8,6	5,3	3,3	11,11	298	298	0.00303017	0.0362474	0.615,0.667	0.214,0.214	0.427
	FBgn0036257	RhoGAP68F	3L	12138868	12143380	+	12139962	12140128	12141251	12141377	12138867	12138951	12141440	12141476	227,113	168,176	67,52	283,272	298	274	1.54417e-06	5.51169e-05	0.554,0.371	0.179,0.15	0.298
	FBgn0039709	Cad99C	3R	29841657	29854699	+	29842724	29842873	29845598	29845760	29841656	29841790	29849076	29849253	69,62	1,9	138,112	76,59	297	298	4.8578e-08	2.87071e-06	0.986,0.874	0.646,0.656	0.279
	FBgn0041182	Tep2	2L	7693727	7701601	-	7697006	7697157	7697976	7698130	7696027	7696206	7698724	7698992	60,54	67,56	44,37	105,108	298	298	0.000997936	0.0152306	0.472,0.491	0.295,0.255	0.206
	FBgn0050463	Pgant9	2R	16673235	16732916	-	16705508	16706279	16716153	16716211	16699205	16699574	16730898	16731384	56,61	296,226	23,19	302,231	206	298	0.000712343	0.0116771	0.215,0.281	0.099,0.106	0.145
	FBgn0051363	Jupiter	3R	11590386	11619906	-	11592366	11592624	11593632	11593766	11590385	11591307	11619703	11619906	875,522	376,345	894,777	1236,1078	282	298	5.63927e-08	3.11993e-06	0.711,0.615	0.433,0.432	0.231
	FBgn0053547	Rim	3R	17872748	17916578	-	17878777	17878997	17881177	17881427	17877488	17877666	17881775	17881901	12,8	0,1	10,5	11,5	298	298	3.82353e-06	0.000126291	1.0,0.889	0.476,0.5	0.457
	FBgn0261113	Xrp1	3R	18914968	18926989	+	18919422	18919512	18920412	18921319	18918259	18918625	18925077	18925796	250,167	602,564	178,173	1122,1006	238	298	0.000375698	0.0069285	0.342,0.27	0.166,0.177	0.135
	FBgn0263197	Patronin	2R	17519024	17535866	-	17524703	17526317	17526833	17526980	17524347	17524584	17527213	17527315	219,128	51,67	141,118	131,118	295	298	0.000432758	0.00777789	0.813,0.659	0.521,0.503	0.224
	FBgn0263197	Patronin	2R	17519024	17535866	-	17524703	17526413	17526833	17526980	17524347	17524584	17527213	17527315	219,128	75,76	141,118	134,114	295	298	0.00465993	0.0481889	0.747,0.63	0.515,0.511	0.175
	FBgn0263197	Patronin	2R	17519024	17535866	-	17524703	17526416	17526833	17526980	17524347	17524584	17527213	17527315	219,128	108,75	141,118	134,132	295	298	0.00434296	0.0459855	0.672,0.633	0.515,0.475	0.158
	FBgn0263346	smash	3R	4659579	4712193	+	4670796	4670850	4680778	4680837	4659578	4660399	4697190	4697542	267,214	18,4	95,87	76,38	202	207	2.09832e-14	5.15954e-12	0.938,0.982	0.562,0.701	0.329
	FBgn0264270	Sxl	X	7074550	7098053	-	7088577	7088749	7090133	7090504	7087613	7087659	7098000	7098053	9,3	17,14	0,1	38,46	298	298	0.000249273	0.00494729	0.346,0.176	0.0,0.021	0.251
	FBgn0264491	how	3R	22042191	22079321	+	22042906	22043379	22062724	22062858	22042190	22042355	22069110	22069227	719,422	411,327	543,638	953,938	298	282	3.15263e-08	2.02209e-06	0.623,0.55	0.35,0.392	0.216
	FBgn0285963	CG46339	3R	26915761	26945309	+	26916502	26916562	26924633	26925261	26915760	26915908	26935958	26936291	10,9	12,1	2,0	5,9	208	298	0.000891	0.0140842	0.544,0.928	0.364,0.0	0.554
mxe_down	FBgn0001311	kkv	3R	5378093	5392866	-	5380353	5380530	5380644	5380821	5379487	5379688	5381321	5383252	156,85	54,48	199,196	38,27	298	298	0.00291311	0.0350364	0.743,0.639	0.84,0.879	-0.168
	FBgn0003429	slo	3R	24662491	24711595	+	24698197	24698269	24699375	24699426	24695340	24695417	24703020	24703053	1,1	51,27	9,5	16,21	220	199	0.000364527	0.00677897	0.017,0.032	0.337,0.177	-0.233
	FBgn0003429	slo	3R	24662491	24711595	+	24698197	24698269	24702087	24702162	24695340	24695417	24703020	24703053	1,1	8,5	9,5	6,6	220	223	0.00282864	0.0343944	0.112,0.169	0.603,0.458	-0.39
	FBgn0003429	slo	3R	24662491	24711595	+	24698197	24698269	24703020	24703053	24695340	24695417	24703117	24703307	4,1	14,9	13,5	3,0	220	181	1.06833e-06	3.94035e-05	0.19,0.084	0.781,1.0	-0.754
	FBgn0003429	slo	3R	24662491	24711595	+	24699375	24699426	24703020	24703053	24695340	24695417	24703117	24703307	11,7	14,9	13,16	3,0	199	181	2.42424e-05	0.0006878	0.417,0.414	0.798,1.0	-0.484
	FBgn0010352	Nc73EF	3L	16954822	16968724	+	16960537	16960667	16961499	16961602	16959704	16959884	16962334	16962413	427,295	196,163	950,746	246,200	278	251	0.00243928	0.0304979	0.663,0.62	0.777,0.771	-0.133
	FBgn0013305	Nmda1	2R	12877094	12880230	-	12879051	12879146	12879196	12879222	12878384	12878710	12879447	12879656	29,22	58,26	26,38	8,2	174	243	7.20073e-08	3.70586e-06	0.411,0.542	0.819,0.964	-0.415
	FBgn0013305	Nmda1	2R	12877094	12880230	-	12879051	12879146	12879196	12879222	12878384	12878710	12879451	12879656	28,19	58,26	24,34	8,2	174	243	5.12162e-08	2.90619e-06	0.403,0.505	0.807,0.96	-0.429
	FBgn0013305	Nmda1	2R	12877094	12880230	-	12879051	12879146	12879196	12879222	12878384	12878710	12879688	12879798	120,145	90,68	106,159	20,18	174	243	1.88767e-06	6.63081e-05	0.651,0.749	0.881,0.925	-0.203
	FBgn0013733	shot	2R	13864237	13942110	-	13895109	13895307	13899449	13899671	13894838	13894969	13901436	13901572	151,97	170,123	292,290	208,151	298	298	0.00273329	0.0334186	0.47,0.441	0.584,0.658	-0.165
	FBgn0027556	CG4928	X	16913180	16938209	+	16928614	16928742	16933403	16933538	16913179	16914220	16934037	16934443	129,142	379,295	398,341	488,435	276	283	0.00059092	0.00998248	0.259,0.33	0.455,0.446	-0.156
	FBgn0030608	Lsd-2	X	15069127	15076220	-	15072785	15072967	15073340	15073391	15071462	15072648	15073936	15074374	454,371	190,148	573,458	106,87	199	298	0.0044254	0.0464143	0.782,0.79	0.89,0.887	-0.103
	FBgn0031299	CG4629	2L	1083091	1102504	-	1087694	1088106	1101920	1101968	1085926	1086026	1102322	1102504	1,0	38,34	7,12	41,61	196	298	8.79268e-05	0.0020269	0.038,0.0	0.206,0.23	-0.199
	FBgn0032456	MRP	2L	12719045	12766546	+	12728020	12728241	12729184	12729405	12726745	12727116	12737958	12738176	64,33	49,31	40,59	12,8	298	298	7.58826e-05	0.00181947	0.566,0.516	0.769,0.881	-0.284
	FBgn0033159	Dscam1	2R	7317924	7381899	-	7350580	7350704	7354685	7354809	7348130	7348975	7361717	7361867	0,0	6,5	10,9	12,11	272	272	4.20929e-08	2.58755e-06	0.0,0.0	0.455,0.45	-0.453
	FBgn0033159	Dscam1	2R	7317924	7381899	-	7358603	7358727	7358806	7358930	7348130	7348975	7361717	7361867	4,0	6,5	10,5	0,3	272	272	0.00102838	0.0154816	0.4,0.0	1.0,0.625	-0.613
	FBgn0033159	Dscam1	2R	7317924	7381899	-	7358603	7358727	7359441	7359565	7348130	7348975	7361717	7361867	4,2	6,5	15,7	0,3	272	272	0.000483506	0.00842519	0.4,0.286	1.0,0.7	-0.507
	FBgn0033159	Dscam1	2R	7317924	7381899	-	7358603	7358727	7359666	7359790	7348130	7348975	7361717	7361867	1,0	6,5	6,2	0,3	272	272	4.09505e-05	0.00103712	0.143,0.0	1.0,0.4	-0.628
	FBgn0033159	Dscam1	2R	7317924	7381899	-	7363880	7364048	7365017	7365179	7361717	7361867	7368387	7368732	9,9	8,6	34,25	3,3	298	298	0.000823972	0.0131183	0.529,0.6	0.919,0.893	-0.342
	FBgn0041182	Tep2	2L	7693727	7701601	-	7696593	7696807	7697006	7697157	7696027	7696206	7698724	7698992	67,56	386,287	105,108	117,123	298	298	1.11022e-15	3.50989e-13	0.148,0.163	0.473,0.468	-0.315
	FBgn0041182	Tep2	2L	7693727	7701601	-	7696593	7696807	7697400	7697581	7696027	7696206	7698724	7698992	336,330	386,287	450,369	117,123	298	298	2.50577e-13	3.96091e-11	0.465,0.535	0.794,0.75	-0.272
	FBgn0053208	Mical	3R	10001554	10042895	-	10027329	10027381	10037815	10037890	10019704	10021383	10041971	10041998	38,54	34,24	102,83	9,24	223	200	0.00323619	0.0378926	0.501,0.669	0.91,0.756	-0.248
	FBgn0261341	verm	3L	19690033	19695260	-	19692264	19692377	19692720	19692851	19691808	19691958	19692982	19693094	400,265	2238,1522	486,377	1078,746	279	261	2.62298e-09	2.63848e-07	0.143,0.14	0.297,0.321	-0.167
	FBgn0264270	Sxl	X	7074550	7098053	-	7090133	7090504	7096814	7096935	7087613	7087659	7096997	7097066	11,13	5,6	13,9	0,1	269	298	0.000645062	0.0107333	0.709,0.706	1.0,0.909	-0.247
	FBgn0264693	ens	3L	4122907	4134550	-	4128613	4128973	4130388	4130643	4126988	4127162	4131120	4131236	31,18	267,153	53,52	87,187	298	298	0.00105102	0.0157156	0.104,0.105	0.379,0.218	-0.194

## Sheet: 3. 95Ca del vs WT
	GeneID	gene_symbol	seqnames	start	end	strand	exonStart_0base	exonEnd	upstreamES	upstreamEE	downstreamES	downstreamEE	IJC_SAMPLE_1	SJC_SAMPLE_1	IJC_SAMPLE_2	SJC_SAMPLE_2	IncFormLen	SkipFormLen	PValue	FDR	IncLevel1	IncLevel2	IncLevelDifference
se_up	FBgn0001105	Gbeta13F	X	15860115	15866175	+	15860744	15861153	15860114	15860250	15861235	15861492	15,13	3,10	2,1	4,14	298	149	0.000197362	0.014487	0.714,0.394	0.2,0.034	0.437
	FBgn0003435	sm	2R	19517864	19631508	-	19546011	19546059	19538029	19538211	19564440	19564512	21,20	2,0	18,3	9,2	196	149	0.000306076	0.0217305	0.889,1.0	0.603,0.533	0.376
	FBgn0004838	Hrb27C	2L	6920704	6932057	+	6922730	6922826	6920703	6920861	6923783	6924400	253,183	5,6	396,293	56,53	244	149	5.19904e-07	0.000124531	0.969,0.949	0.812,0.771	0.167
	FBgn0004854	B-H2	X	17314581	17324175	+	17320734	17320774	17314580	17315911	17320838	17321091	7,2	4,2	0,2	19,4	188	149	0.000420435	0.0277304	0.581,0.442	0.0,0.284	0.369
	FBgn0004910	Eip63F-1	3L	3909973	3935617	-	3924223	3924474	3919883	3920027	3928997	3929163	428,402	87,54	11,63	33,28	298	149	0.000740199	0.0443243	0.711,0.788	0.143,0.529	0.414
	FBgn0005666	bt	4	724400	776474	+	736338	736515	736148	736187	736818	737046	444,360	166,135	382,261	396,273	298	149	5.63345e-10	3.20473e-07	0.572,0.571	0.325,0.323	0.247
	FBgn0014133	bif	X	11678970	11694740	+	11692798	11693177	11689200	11689543	11693546	11694740	260,194	123,106	107,81	199,97	298	149	1.06377e-07	3.02577e-05	0.514,0.478	0.212,0.295	0.242
	FBgn0015371	chn	2R	15115236	15144783	+	15140470	15140677	15139078	15140095	15140973	15141300	4,6	0,0	9,3	11,1	298	149	1.23158e-07	3.29701e-05	1.0,1.0	0.29,0.6	0.555
	FBgn0019660	lncRNA:roX2	X	11579065	11580432	+	11579348	11579399	11579064	11579124	11579669	11580084	349,340	112,105	28,66	168,52	199	149	0.000150229	0.0117878	0.7,0.708	0.111,0.487	0.405
	FBgn0020887	Su(z)12	3L	19918242	19923462	-	19919358	19919520	19918241	19919290	19920153	19920986	54,27	54,35	19,21	158,39	298	149	0.000352413	0.0239378	0.333,0.278	0.057,0.212	0.171
	FBgn0028577	hfp	3L	1496853	1502590	-	1501169	1501406	1500244	1500388	1501798	1501892	12,8	1,1	13,7	13,5	298	149	0.000683124	0.0420121	0.857,0.8	0.333,0.412	0.456
	FBgn0028577	hfp	3L	1496853	1502590	-	1501345	1501406	1500244	1500388	1501798	1501892	12,8	1,1	7,3	13,5	209	149	7.58445e-06	0.000908338	0.895,0.851	0.277,0.3	0.585
	FBgn0028577	hfp	3L	1496853	1502590	-	1501350	1501406	1500244	1500388	1501798	1501892	9,8	1,1	9,4	13,5	204	149	0.00013797	0.0110586	0.868,0.854	0.336,0.369	0.508
	FBgn0033062	Ars2	2R	6080828	6085625	-	6084168	6084390	6083940	6084007	6084507	6084787	55,50	53,46	22,10	110,54	298	149	1.72881e-08	6.05216e-06	0.342,0.352	0.091,0.085	0.259
	FBgn0038181	CG9297	3R	13771495	13779317	+	13775227	13775305	13774798	13774837	13775381	13775459	287,242	0,0	107,116	17,21	226	149	6.41778e-10	3.24526e-07	1.0,1.0	0.806,0.785	0.204
	FBgn0038826	Syp	3R	20756729	20810726	+	20800016	20800300	20798290	20798409	20802289	20802551	920,711	898,948	340,351	1444,1028	298	149	1.70697e-12	2.58947e-09	0.339,0.273	0.105,0.146	0.181
	FBgn0041182	Tep2	2L	7693727	7701601	-	7696593	7696807	7696027	7696206	7697006	7697157	211,185	30,17	98,78	60,25	298	149	5.86309e-05	0.00523194	0.779,0.845	0.45,0.609	0.283
	FBgn0041182	Tep2	2L	7693727	7701601	-	7696593	7696807	7696027	7696206	7697400	7697581	207,182	170,160	95,76	264,111	298	149	0.000247097	0.0178498	0.378,0.363	0.152,0.255	0.167
	FBgn0051363	Jupiter	3R	11590386	11619906	-	11591500	11591911	11590385	11591307	11591994	11592244	254,216	52,44	162,120	108,51	298	149	0.000178706	0.0135548	0.709,0.711	0.429,0.541	0.225
	FBgn0053208	Mical	3R	10001554	10042895	-	10037815	10037890	10027329	10027381	10042791	10042895	23,12	0,0	40,24	10,10	223	149	1.23772e-08	4.69405e-06	1.0,1.0	0.728,0.616	0.328
	FBgn0053208	Mical	3R	10001554	10042895	-	10041971	10041998	10027329	10027381	10042791	10042821	2,5	0,0	31,7	10,10	175	149	1.87626e-06	0.000294444	1.0,1.0	0.725,0.373	0.451
	FBgn0085376	CG34347	3R	31311157	31371748	+	31366842	31367522	31361118	31362358	31370235	31371748	25,18	0,0	41,17	11,3	298	149	1.33463e-06	0.000233612	1.0,1.0	0.651,0.739	0.305
	FBgn0086372	lap	3R	7186994	7200941	+	7194197	7194458	7193592	7193688	7195615	7195895	37,45	42,28	14,10	66,46	298	149	7.53033e-06	0.000908338	0.306,0.446	0.096,0.098	0.279
	FBgn0086372	lap	3R	7186994	7200941	+	7194197	7194458	7193592	7193688	7195693	7195895	37,41	30,13	16,13	62,36	298	149	3.54275e-05	0.00343043	0.381,0.612	0.114,0.153	0.363
	FBgn0086690	Plp	3L	15066081	15094724	-	15074324	15074492	15072528	15073194	15074683	15075847	264,214	11,15	113,154	36,34	298	149	5.99621e-07	0.000129946	0.923,0.877	0.611,0.694	0.248
	FBgn0259927	CG42450	X	18813297	18830406	+	18823507	18823615	18822581	18823085	18824649	18824934	3,7	4,5	0,0	23,4	256	149	0.000114184	0.00962315	0.304,0.449	0.0,0.0	0.377
	FBgn0263077	CG43340	2R	7623242	7651787	+	7640831	7647677	7640116	7640617	7648296	7648510	56,35	75,58	18,10	142,45	298	149	8.99074e-06	0.00102827	0.272,0.232	0.06,0.1	0.172
	FBgn0263077	CG43340	2R	7623242	7651787	+	7647305	7647677	7640116	7640617	7648296	7648510	96,70	75,58	30,14	142,45	298	149	2.42347e-10	1.8382e-07	0.39,0.376	0.096,0.135	0.268
	FBgn0264822	asRNA:CR44030	4	959675	962692	+	962250	962347	959674	960038	962400	962692	11,14	10,3	0,4	25,18	245	149	1.09132e-05	0.00121137	0.401,0.739	0.0,0.119	0.511
	FBgn0265991	Zasp52	2R	15762565	15817004	-	15763925	15764835	15763645	15763829	15765122	15769551	195,118	313,328	134,67	746,463	298	149	0.000184443	0.0137606	0.238,0.152	0.082,0.067	0.12
	FBgn0283657	Tlk	X	3720007	3789770	+	3775814	3777360	3772639	3773034	3781654	3783559	17,18	0,0	34,14	10,2	298	149	2.15452e-05	0.00222846	1.0,1.0	0.63,0.778	0.296
	FBgn0284408	trol	X	2470460	2545427	-	2495611	2495728	2495040	2495238	2501626	2501737	62,24	5,0	21,17	15,9	265	149	2.50284e-06	0.000355951	0.875,1.0	0.44,0.515	0.46
se_down	FBgn0004167	kst	3L	3336860	3368133	+	3366443	3366773	3366199	3366310	3367514	3368133	320,203	224,136	353,271	120,74	298	149	3.89877e-05	0.00369652	0.417,0.427	0.595,0.647	-0.199
	FBgn0004167	kst	3L	3336860	3368133	+	3366443	3366962	3366199	3366310	3367514	3368133	163,120	224,136	251,170	120,74	298	149	1.832e-07	4.6319e-05	0.267,0.306	0.511,0.535	-0.237
	FBgn0004167	kst	3L	3336860	3368133	+	3366443	3367010	3366199	3366310	3367514	3368133	199,155	224,136	316,214	120,74	298	149	5.55011e-08	1.80418e-05	0.308,0.363	0.568,0.591	-0.244
	FBgn0011224	heph	3R	31846987	32015520	-	31972501	31972553	31969755	31969785	31975447	31975965	0,0	21,34	10,23	7,13	200	149	9.99201e-15	2.27368e-11	0.0,0.0	0.516,0.569	-0.542
	FBgn0013733	shot	2R	13864237	13942110	-	13899449	13899671	13894838	13894969	13901436	13901572	151,97	54,36	218,120	19,11	298	149	6.36816e-07	0.000131734	0.583,0.574	0.852,0.845	-0.27
	FBgn0016694	Pdp1	3L	7811458	7867369	-	7819987	7820029	7818068	7818223	7830386	7831827	9,9	16,16	1,5	0,0	190	149	1.13752e-06	0.000207073	0.306,0.306	1.0,1.0	-0.694
	FBgn0016917	Stat92E	3R	20535323	20552311	-	20541679	20542092	20540522	20541553	20550720	20551107	389,307	946,620	308,262	292,324	298	149	0.000341284	0.0235331	0.171,0.198	0.345,0.288	-0.132
	FBgn0019660	lncRNA:roX2	X	11579065	11580432	+	11579511	11579528	11579385	11579399	11579669	11580100	95,95	374,365	25,61	30,68	165	149	1.46603e-06	0.000247107	0.187,0.19	0.429,0.448	-0.25
	FBgn0027580	PCB	2R	9850703	9861543	-	9853682	9853730	9852547	9853205	9854510	9856020	294,266	451,386	726,356	625,252	196	149	0.000483562	0.0314384	0.331,0.344	0.469,0.518	-0.156
	FBgn0032010	CG8086	2L	8244160	8257502	-	8251223	8251325	8250862	8250967	8252227	8252533	1,0	17,13	17,13	8,9	250	149	8.82961e-10	3.65305e-07	0.034,0.0	0.559,0.463	-0.494
	FBgn0033246	ACC	2R	7974115	7991862	-	7985601	7985778	7985065	7985451	7986948	7987237	4,1	12,1	19,3	4,0	298	149	0.000393156	0.0263125	0.143,0.333	0.704,1.0	-0.614
	FBgn0033246	ACC	2R	7974115	7991862	-	7985601	7985778	7985065	7985451	7987065	7987237	8,1	34,24	18,4	7,1	298	149	5.82468e-07	0.000129946	0.105,0.02	0.563,0.667	-0.552
	FBgn0033365	CG8170	2R	9019032	9031045	-	9021255	9021486	9020353	9020465	9021727	9021858	1,0	11,2	8,3	6,3	298	149	0.000108793	0.0093418	0.043,0.0	0.4,0.333	-0.345
	FBgn0034194	CG15611	2R	17108844	17114360	+	17109942	17110074	17108843	17109276	17110166	17110500	86,72	36,47	151,77	6,8	280	149	8.62911e-10	3.65305e-07	0.56,0.449	0.931,0.837	-0.379
	FBgn0034903	sona	2R	23753477	23798395	-	23759725	23759781	23758475	23758602	23760621	23760674	52,44	25,11	266,90	23,3	204	149	0.000171292	0.0132127	0.603,0.745	0.894,0.956	-0.251
	FBgn0035049	Mmp1	2R	24671294	24688184	-	24672550	24672851	24671293	24672306	24675062	24675141	46,54	47,44	150,79	16,25	298	149	1.84924e-05	0.00200378	0.329,0.38	0.824,0.612	-0.363
	FBgn0035049	Mmp1	2R	24671294	24688184	-	24672550	24673316	24671293	24672306	24674972	24675141	56,41	146,107	148,74	91,72	298	149	3.73458e-06	0.000485602	0.161,0.161	0.448,0.339	-0.233
	FBgn0035049	Mmp1	2R	24671294	24688184	-	24672550	24673316	24671293	24672306	24675062	24675141	39,45	47,44	162,69	16,25	298	149	2.39555e-05	0.0024227	0.293,0.338	0.835,0.58	-0.392
	FBgn0035772	Sh3beta	3L	7364584	7369260	-	7366441	7366516	7364583	7364961	7367558	7367984	2,5	14,2	20,6	1,0	223	149	1.99388e-06	0.000302472	0.087,0.626	0.93,1.0	-0.609
	FBgn0037643	ScsbetaA	3R	8938724	8943027	+	8941313	8941316	8940921	8941189	8941407	8941832	124,129	777,634	218,200	471,433	151	149	1.04174e-06	0.00019754	0.136,0.167	0.314,0.313	-0.162
	FBgn0038165	Task6	3R	13667046	13674542	-	13669016	13669049	13667045	13668834	13669535	13669696	3,1	15,13	21,10	16,9	181	149	4.98435e-05	0.00453676	0.141,0.06	0.519,0.478	-0.398
	FBgn0041182	Tep2	2L	7693727	7701601	-	7697006	7697157	7696027	7696206	7697976	7698130	32,17	50,29	60,25	18,11	298	149	7.25203e-06	0.000908338	0.242,0.227	0.625,0.532	-0.344
	FBgn0043070	MESK2	2R	21502097	21517241	+	21507321	21507722	21502096	21502479	21510117	21510201	209,177	47,49	293,126	17,17	298	149	0.000794379	0.046349	0.69,0.644	0.896,0.787	-0.174
	FBgn0052451	SPoCk	3L	22749444	22787631	+	22774737	22775137	22773535	22773716	22775314	22775371	11,7	15,7	43,14	9,1	298	149	0.000138138	0.0110586	0.268,0.333	0.705,0.875	-0.49
	FBgn0063485	Lasp	3L	16676406	16711677	-	16678807	16679473	16678424	16678660	16680811	16680947	157,108	38,19	252,62	10,1	298	149	1.60004e-06	0.000260064	0.674,0.74	0.926,0.969	-0.24
	FBgn0063485	Lasp	3L	16676406	16711677	-	16678807	16679869	16678424	16678660	16680811	16680947	159,71	38,19	254,65	10,1	298	149	6.7193e-08	2.03864e-05	0.677,0.651	0.927,0.97	-0.284
	FBgn0063485	Lasp	3L	16676406	16711677	-	16678807	16679932	16678424	16678660	16680811	16680947	207,100	38,19	260,69	10,1	298	149	9.03778e-06	0.00102827	0.731,0.725	0.929,0.972	-0.223
	FBgn0261549	rdgA	X	8907068	9029476	+	9024073	9024137	9022017	9022239	9024260	9024418	1,0	22,14	16,8	66,9	212	149	0.000550931	0.0353139	0.031,0.0	0.146,0.385	-0.25
	FBgn0261988	Gprk2	3R	31405245	31457873	+	31410353	31410401	31405244	31405956	31433458	31433888	42,24	186,109	184,190	15,20	196	149	0	0	0.147,0.143	0.903,0.878	-0.746
	FBgn0263346	smash	3R	4659579	4712193	+	4680778	4680837	4659578	4660399	4697190	4697542	18,4	11,5	18,18	0,1	207	149	1.01705e-06	0.00019754	0.541,0.365	1.0,0.928	-0.511
	FBgn0263346	smash	3R	4659579	4712193	+	4680778	4680837	4670796	4670850	4697190	4697542	55,40	106,111	69,104	36,52	207	149	1.30455e-10	1.48426e-07	0.272,0.206	0.58,0.59	-0.346
	FBgn0283680	IP3K2	X	13303633	13329303	+	13318414	13319047	13305514	13306947	13327347	13327597	9,15	43,34	29,24	18,20	298	149	0.000138506	0.0110586	0.095,0.181	0.446,0.375	-0.272
	GeneID	gene_symbol	seqnames	start	end	strand	riExonStart_0base	riExonEnd	upstreamES	upstreamEE	downstreamES	downstreamEE	IJC_SAMPLE_1	SJC_SAMPLE_1	IJC_SAMPLE_2	SJC_SAMPLE_2	IncFormLen	SkipFormLen	PValue	FDR	IncLevel1	IncLevel2	IncLevelDifference
ri_up	FBgn0004838	Hrb27C	2L	6920704	6932057	+	6924684	6932057	6924684	6925564	6927980	6932057	62,49	0,3	31,33	8,11	298	149	2.2089e-05	0.00196422	1.0,0.891	0.66,0.6	0.316
	FBgn0015521	RpS21	2L	2856070	2857029	+	2856376	2856705	2856376	2856568	2856630	2856705	153,70	13,1	64,18	763,392	210	149	0	0	0.893,0.98	0.056,0.032	0.892
	FBgn0020379	Rfx	3R	10361760	10378068	-	10365504	10365973	10365504	10365669	10365735	10365973	7,2	3,2	0,1	10,10	214	149	1.73096e-05	0.00181908	0.619,0.41	0.0,0.065	0.482
	FBgn0027086	IleRS	3L	22288665	22292810	+	22288664	22288939	22288664	22288740	22288794	22288939	7,6	15,7	1,0	21,3	202	149	6.28791e-05	0.00454302	0.256,0.387	0.034,0.0	0.304
	FBgn0031155	CG15446	X	21095680	21102206	-	21102022	21102206	21102022	21102051	21102130	21102206	11,10	7,8	1,2	3,18	227	149	0.00016709	0.00938989	0.508,0.451	0.18,0.068	0.356
	FBgn0031319	CG4896	2L	1177690	1182454	+	1179996	1180449	1179996	1180123	1180212	1180449	10,11	10,11	4,1	35,8	237	149	0.000170578	0.00938989	0.386,0.386	0.067,0.073	0.316
	FBgn0031515	CG9664	2L	3291245	3294706	-	3292173	3292576	3292173	3292298	3292459	3292576	7,7	0,1	9,3	16,5	298	149	2.42814e-06	0.000311881	1.0,0.778	0.22,0.231	0.663
	FBgn0039186	CG5746	3R	24343895	24348791	-	24348146	24348791	24348146	24348563	24348661	24348791	12,4	13,2	1,0	8,4	246	149	7.99875e-05	0.00543915	0.359,0.548	0.07,0.0	0.418
	FBgn0039249	CG11168	3R	24918106	24922385	+	24919923	24920633	24919923	24920047	24920358	24920633	52,36	9,8	11,25	8,19	298	149	0.00139241	0.0492719	0.743,0.692	0.407,0.397	0.316
	FBgn0039637	Ctl2	3R	29123370	29128247	+	29123415	29124104	29123415	29123499	29123800	29124104	2,1	0,0	3,1	10,4	298	149	4.04245e-08	9.34614e-06	1.0,1.0	0.13,0.111	0.879
	FBgn0053095	CG33095	3R	25097672	25102146	+	25097671	25098469	25097671	25097718	25097834	25098469	8,8	2,0	1,0	11,2	264	149	1.87372e-09	7.22007e-07	0.693,1.0	0.049,0.0	0.822
	FBgn0262527	nsl1	3R	15793782	15802102	+	15798086	15799036	15798086	15798404	15798723	15799036	38,9	10,3	13,5	21,8	298	149	0.00014592	0.0088781	0.655,0.6	0.236,0.238	0.39
	FBgn0266410	CG45050	3R	9340216	9362994	+	9358255	9362994	9358255	9358571	9358628	9362994	13,14	5,4	10,10	22,14	205	149	0.000806642	0.0358645	0.654,0.718	0.248,0.342	0.391
ri_down	FBgn0010548	Aldh-III	2R	7466879	7477162	-	7473721	7474130	7473721	7473843	7473915	7474130	23,21	11,12	47,27	2,1	220	149	2.14273e-06	0.000309625	0.586,0.542	0.941,0.948	-0.38
	FBgn0015924	crq	2L	448254	453024	-	452576	453024	452576	452736	452797	453024	15,4	8,4	2,6	0,1	209	149	0.0011891	0.0458199	0.572,0.416	1.0,0.811	-0.411
	FBgn0030503	Tango2	X	13616989	13619207	+	13616988	13617575	13616988	13617106	13617177	13617575	7,3	7,11	2,4	0,0	219	149	3.06422e-14	1.77112e-11	0.405,0.157	1.0,1.0	-0.719
	FBgn0030674	HUWE1	X	15712628	15731935	+	15721545	15724378	15721545	15723157	15723232	15724378	29,17	7,5	32,23	1,0	223	149	0.000133214	0.00855531	0.735,0.694	0.955,1.0	-0.263
	FBgn0032726	CG10621	2L	18952206	18954431	-	18953403	18953790	18953403	18953573	18953673	18953790	3,6	7,4	3,3	1,0	248	149	0.00087938	0.0376505	0.205,0.474	0.643,1.0	-0.482
	FBgn0036365	cmb	3L	13442594	13449245	+	13444367	13445898	13444367	13445639	13445738	13445898	2,1	7,4	17,7	3,2	247	149	2.19569e-05	0.00196422	0.147,0.131	0.774,0.679	-0.588
	FBgn0038256	CG7530	3R	14724760	14731509	-	14730510	14731509	14730510	14730629	14731404	14731509	2,1	22,20	8,7	13,7	298	149	0.000963895	0.0384229	0.043,0.024	0.235,0.333	-0.251
	FBgn0263611	lncRNA:CR43620	2L	19978829	19979723	+	19978828	19979723	19978828	19979043	19979105	19979723	1,1	9,6	14,3	3,0	210	149	9.16606e-07	0.000151371	0.073,0.106	0.768,1.0	-0.794
	GeneID	gene_symbol	seqnames	start	end	strand	longExonStart_0base	longExonEnd	shortES	shortEE	flankingES	flankingEE	IJC_SAMPLE_1	SJC_SAMPLE_1	IJC_SAMPLE_2	SJC_SAMPLE_2	IncFormLen	SkipFormLen	PValue	FDR	IncLevel1	IncLevel2	IncLevelDifference
a5ss_up	FBgn0002413	dco	3R	31054085	31061210	-	31061069	31061210	31061076	31061210	31058539	31058627	7,7	21,3	1,0	10,7	155	149	0.000259368	0.0154597	0.243,0.692	0.088,0.0	0.423
	FBgn0004838	Hrb27C	2L	6920704	6932057	+	6921638	6921798	6921638	6921673	6922730	6922826	6,10	0,0	17,10	7,6	273	149	1.10219e-08	4.99293e-06	1.0,1.0	0.57,0.476	0.477
	FBgn0010412	RpS19a	X	16637894	16639249	+	16637893	16637949	16637893	16637927	16638232	16638303	89,47	484,271	12,18	1269,175	170	149	1.35525e-07	3.4107e-05	0.139,0.132	0.008,0.083	0.09
	FBgn0025837	CG17636	X	124370	126714	-	126354	126496	126362	126496	125494	126259	6,9	8,7	0,1	5,11	156	149	2.01531e-05	0.00217366	0.417,0.551	0.0,0.08	0.444
	FBgn0027590	GstE12	2R	24766718	24768172	-	24767638	24768172	24768097	24768172	24767474	24767577	54,50	147,93	9,16	437,65	298	149	5.96042e-08	1.92862e-05	0.155,0.212	0.01,0.11	0.123
	FBgn0028504	CG12182	3L	2595842	2599579	-	2599124	2599579	2599264	2599579	2597193	2599070	5,7	2,6	0,0	23,6	288	149	1.01775e-05	0.001356	0.564,0.376	0.0,0.0	0.47
	FBgn0031769	CG9135	2L	6050800	6053877	+	6050838	6051067	6050838	6050921	6051616	6052022	1,2	0,0	1,8	101,55	294	149	9.10775e-06	0.00128932	1.0,1.0	0.005,0.069	0.963
	FBgn0034797	nahoda	2R	22896174	22916719	+	22896173	22896864	22896173	22896396	22904071	22904473	108,126	5,3	102,86	37,12	298	149	9.30007e-05	0.00726367	0.915,0.955	0.58,0.782	0.254
	FBgn0036302	sowah	3L	12537513	12572542	-	12539621	12540146	12540056	12540146	12538549	12538576	74,51	101,73	23,16	89,81	298	149	0.000322581	0.0178206	0.268,0.259	0.114,0.09	0.162
	FBgn0040859	lncRNA:CR32658	X	12091264	12092272	+	12091805	12092083	12091805	12092070	12092142	12092272	15,8	32,32	3,0	47,22	161	149	0.000412725	0.02174	0.303,0.188	0.056,0.0	0.217
	FBgn0052423	shep	3L	5155821	5277944	-	5166934	5167059	5166967	5167059	5163833	5163969	62,48	0,3	66,26	10,12	181	149	0.000714749	0.0337272	1.0,0.929	0.845,0.641	0.222
	FBgn0263289	scrib	3R	26536350	26604051	+	26536349	26536601	26536349	26536531	26537370	26537784	79,42	6,2	45,31	33,31	218	149	1.04354e-11	2.36362e-08	0.9,0.935	0.482,0.406	0.473
	FBgn0263980	Stacl	2R	15401096	15471884	+	15415124	15416838	15415124	15416831	15419350	15419551	10,7	2,0	11,9	18,5	155	149	0.000562657	0.0277048	0.828,1.0	0.37,0.634	0.412
a5ss_down	FBgn0003118	pnt	3R	23290231	23346167	-	23293844	23295238	23293850	23295238	23291716	23292681	0,0	6,3	7,2	7,5	154	149	0.000147602	0.0104475	0.0,0.0	0.492,0.279	-0.386
	FBgn0023528	CG2924	X	2264657	2270761	-	2270637	2270761	2270698	2270761	2268937	2269704	1,0	2,4	17,4	10,2	209	149	0.000164475	0.011289	0.263,0.0	0.548,0.588	-0.437
	FBgn0028487	f-cup	3R	13695263	13700838	-	13696436	13696768	13696441	13696768	13696202	13696346	0,0	6,7	4,1	2,1	153	149	0.000701325	0.0337272	0.0,0.0	0.661,0.493	-0.577
	FBgn0029897	RpL17	X	6741537	6744238	-	6744108	6744238	6744195	6744238	6743057	6743148	53,38	866,425	97,32	231,169	235	149	0.000294995	0.0171324	0.037,0.054	0.21,0.107	-0.113
	FBgn0030051	spirit	X	8571099	8573593	-	8573528	8573593	8573561	8573593	8572827	8572999	1,0	10,12	11,5	19,3	181	149	4.55485e-05	0.00425406	0.076,0.0	0.323,0.578	-0.413
	FBgn0030674	HUWE1	X	15712628	15731935	+	15713900	15714393	15713900	15714381	15714716	15714956	23,28	197,173	81,45	125,93	160	149	4.10177e-08	1.54842e-05	0.098,0.131	0.376,0.311	-0.229
	FBgn0030735	CG3632	X	16296671	16303308	+	16296670	16296907	16296670	16296883	16297649	16297784	3,0	8,4	5,2	1,0	172	149	6.26858e-06	0.00101521	0.245,0.0	0.812,1.0	-0.784
	FBgn0030893	RhoGAP16F	X	18093145	18097413	+	18094589	18094815	18094589	18094754	18095084	18096453	1,0	26,23	11,3	2,5	209	149	4.69543e-05	0.00425406	0.027,0.0	0.797,0.3	-0.535
	FBgn0031596	CG15429	2L	4352975	4354034	+	4352974	4353195	4352974	4353193	4353249	4353615	6,7	2,11	5,1	0,0	150	149	4.49941e-05	0.00425406	0.749,0.387	1.0,1.0	-0.432
	FBgn0032774	CG17549	2L	19387050	19390075	-	19389926	19390075	19389935	19390075	19388039	19388313	0,1	2,6	9,3	11,1	157	149	0.000441359	0.02272	0.0,0.137	0.437,0.74	-0.52
	FBgn0033725	Cpr49Ac	2R	12386666	12390057	+	12387381	12387517	12387381	12387427	12387912	12387939	3585,2683	1598,1111	8341,3399	1660,701	238	149	7.13412e-07	0.000146898	0.584,0.602	0.759,0.752	-0.163
	FBgn0035431	CG14968	3L	3299336	3303112	-	3300962	3301142	3300988	3301142	3300722	3300883	23,17	8,6	13,1	0,0	174	149	8.39284e-06	0.00126732	0.711,0.708	1.0,1.0	-0.29
	FBgn0037138	P5CDh1	3L	21836665	21841356	-	21840050	21840127	21840098	21840127	21839665	21839831	2,3	4,7	5,2	1,0	196	149	6.46945e-05	0.00523332	0.275,0.246	0.792,1.0	-0.635
	FBgn0065032	Arpc3B	X	17104571	17105852	-	17105749	17105852	17105769	17105852	17105482	17105656	2,0	15,15	5,3	4,2	168	149	0.000114167	0.00834157	0.106,0.0	0.526,0.571	-0.495
	FBgn0260388	CG42514	3L	16491838	16496236	-	16496052	16496236	16496138	16496236	16495299	16495536	0,1	43,26	10,27	11,32	234	149	4.87411e-11	5.51993e-08	0.0,0.024	0.367,0.349	-0.346
	FBgn0261514	NimA	2L	13957539	13963381	+	13961248	13961956	13961248	13961952	13962119	13963381	0,0	2,7	4,4	7,4	152	149	0.000196984	0.0129852	0.0,0.0	0.359,0.495	-0.427
	FBgn0261671	tweek	2L	16888490	16917052	+	16904459	16904712	16904459	16904610	16905298	16905389	70,45	19,10	87,58	4,2	250	149	0.000209291	0.0129852	0.687,0.728	0.928,0.945	-0.229
	FBgn0263289	scrib	3R	26536350	26604051	+	26536349	26536531	26536349	26536397	26537370	26537784	6,2	20,8	37,31	18,5	282	149	6.27503e-06	0.00101521	0.137,0.117	0.521,0.766	-0.516
	FBgn0263289	scrib	3R	26536350	26604051	+	26536349	26536531	26536349	26536501	26537370	26537784	6,2	62,24	36,31	49,39	178	149	9.35248e-08	2.64792e-05	0.075,0.065	0.381,0.4	-0.321
	FBgn0267001	Ten-a	X	12043698	12335214	+	12203797	12203984	12203797	12203878	12204138	12204409	0,0	4,1	12,6	6,5	254	149	9.56752e-10	5.41761e-07	0.0,0.0	0.54,0.413	-0.477
	FBgn0267001	Ten-a	X	12043698	12335214	+	12203797	12203984	12203797	12203978	12204138	12204409	0,0	8,5	11,6	12,3	154	149	4.76658e-10	3.59876e-07	0.0,0.0	0.47,0.659	-0.565
	GeneID	gene_symbol	seqnames	start	end	strand	longExonStart_0base	longExonEnd	shortES	shortEE	flankingES	flankingEE	IJC_SAMPLE_1	SJC_SAMPLE_1	IJC_SAMPLE_2	SJC_SAMPLE_2	IncFormLen	SkipFormLen	PValue	FDR	IncLevel1	IncLevel2	IncLevelDifference
a3ss_up	FBgn0015222	Fer1HCH	3R	30385573	30388178	-	30387463	30387642	30387463	30387602	30387774	30387860	170,85	19,17	20,11	62,10	188	149	1.87954e-08	6.74443e-06	0.876,0.798	0.204,0.466	0.502
	FBgn0028952	Kebab	2L	2045494	2048054	+	2046065	2046218	2046068	2046218	2045699	2046011	11,12	0,0	7,4	8,6	151	149	4.1345e-10	2.22539e-07	1.0,1.0	0.463,0.397	0.57
	FBgn0031515	CG9664	2L	3291245	3294706	-	3292173	3292301	3292173	3292298	3292459	3292576	52,50	0,1	70,29	16,5	151	149	0.000136567	0.0154752	1.0,0.98	0.812,0.851	0.158
	FBgn0032938	CG8671	2L	21262956	21282790	+	21277196	21278429	21277229	21278429	21275723	21275806	45,29	1,0	5,4	8,3	181	149	4.18014e-08	1.28569e-05	0.974,1.0	0.34,0.523	0.555
	FBgn0032938	CG8671	2L	21262956	21282790	+	21277196	21278429	21277277	21278429	21275723	21275806	46,29	38,15	5,4	27,16	229	149	6.14939e-06	0.0011033	0.441,0.557	0.108,0.14	0.375
	FBgn0036493	CG7255	3L	15304255	15311195	+	15305550	15305679	15305570	15305679	15305297	15305486	60,32	21,19	8,4	20,16	168	149	5.5446e-06	0.00108523	0.717,0.599	0.262,0.181	0.436
	FBgn0041710	yellow-f	3R	12991449	12993201	-	12992465	12992795	12992465	12992762	12992982	12993201	30,17	0,0	250,92	33,15	181	149	0.000185958	0.0200184	1.0,1.0	0.862,0.835	0.151
a3ss_down	FBgn0000286	Cf2	2L	4876891	4883107	-	4881214	4882801	4881214	4882365	4882864	4883107	2,3	8,12	26,11	12,3	298	149	3.64145e-05	0.00529539	0.111,0.111	0.52,0.647	-0.473
	FBgn0014007	Ptp69D	3L	12734945	12741568	+	12738771	12739666	12738774	12739666	12738459	12738703	6,4	7,10	24,4	5,0	151	149	0.000389918	0.0335797	0.458,0.283	0.826,1.0	-0.542
	FBgn0028411	Nxt1	2R	23811321	23811974	-	23811320	23811737	23811320	23811724	23811794	23811881	0,2	75,59	22,10	132,30	161	149	0.00011078	0.0132506	0.0,0.03	0.134,0.236	-0.17
	FBgn0035772	Sh3beta	3L	7364584	7369260	-	7364583	7364964	7364583	7364961	7367558	7367984	10,3	14,2	3,4	1,0	151	149	0.000415202	0.0343819	0.413,0.597	0.747,1.0	-0.368
	FBgn0038448	CG12783	3R	16611419	16613400	-	16612925	16613263	16612925	16613250	16613308	16613400	4,2	6,6	1,8	0,0	161	149	2.97736e-10	2.22539e-07	0.382,0.236	1.0,1.0	-0.691
	FBgn0039467	CG14253	3R	26978541	26985706	+	26981513	26981751	26981532	26981751	26980517	26980702	5,11	7,9	30,15	5,0	167	149	0.000244687	0.0229048	0.389,0.522	0.843,1.0	-0.466
	FBgn0040467	Dlip1	X	9158622	9159375	+	9159136	9159375	9159139	9159375	9158621	9159076	2,2	15,28	15,11	24,15	151	149	0.000208576	0.0209091	0.116,0.066	0.381,0.42	-0.309
	FBgn0267376	SelR	3R	10863355	10868642	-	10866808	10866976	10866808	10866960	10868438	10868642	46,16	28,21	110,35	0,0	164	149	4.44089e-16	9.56124e-13	0.599,0.409	1.0,1.0	-0.496
	GeneID	gene_symbol	seqnames	start	end	strand	X1stExonStart_0base	X1stExonEnd	X2ndExonStart_0base	X2ndExonEnd	upstreamES	upstreamEE	downstreamES	downstreamEE	IJC_SAMPLE_1	SJC_SAMPLE_1	IJC_SAMPLE_2	SJC_SAMPLE_2	IncFormLen	SkipFormLen	PValue	FDR	IncLevel1	IncLevel2	IncLevelDifference
mxe_up	FBgn0003429	slo	3R	24662491	24711595	+	24677243	24677335	24682307	24682399	24675632	24675800	24687186	24687297	44,45	11,9	6,9	7,18	240	240	2.59774e-05	0.00160843	0.8,0.833	0.462,0.333	0.419
	FBgn0003429	slo	3R	24662491	24711595	+	24692203	24692316	24693771	24693884	24691777	24691933	24694956	24695115	18,14	13,4	7,5	35,8	261	261	0.00115071	0.0235995	0.581,0.778	0.167,0.385	0.403
	FBgn0003862	trx	3R	14263358	14286903	-	14276305	14277542	14279092	14279541	14274191	14275368	14286208	14286903	81,66	103,102	30,32	142,98	298	298	0.000111986	0.00489447	0.44,0.393	0.174,0.246	0.206
	FBgn0028577	hfp	3L	1496853	1502590	-	1500244	1500388	1501350	1501406	1499771	1499879	1501798	1501892	7,6	1,3	6,3	18,8	204	292	0.000367832	0.010932	0.909,0.741	0.323,0.349	0.489
	FBgn0031859	CG17377	2L	6801358	6802840	-	6801705	6801852	6802039	6802547	6801377	6801650	6802610	6802654	335,234	195,170	128,89	155,116	298	295	0.00220074	0.0360695	0.63,0.577	0.45,0.432	0.162
	FBgn0032123	Oatp30B	2L	9521210	9540060	+	9523162	9523343	9533513	9533751	9521209	9521440	9534886	9535908	109,64	179,119	31,56	257,149	298	298	0.00280606	0.0446765	0.378,0.35	0.108,0.273	0.173
	FBgn0032456	MRP	2L	12719045	12766546	+	12729184	12729405	12729930	12730151	12726745	12727116	12737958	12738176	49,31	80,34	17,11	61,56	298	298	0.00156757	0.0298641	0.38,0.477	0.218,0.164	0.237
	FBgn0033159	Dscam1	2R	7317924	7381899	-	7354685	7354809	7355086	7355210	7348130	7348975	7361717	7361867	4,1	0,0	3,0	12,2	272	272	8.68527e-13	4.84482e-10	1.0,1.0	0.2,0.0	0.9
	FBgn0033159	Dscam1	2R	7317924	7381899	-	7354685	7354809	7355290	7355414	7348130	7348975	7361717	7361867	2,1	0,0	5,0	12,2	272	272	1.85074e-09	3.43776e-07	1.0,1.0	0.294,0.0	0.853
	FBgn0033159	Dscam1	2R	7317924	7381899	-	7354685	7354809	7356106	7356230	7348130	7348975	7361717	7361867	1,2	0,0	9,6	12,2	272	272	1.83767e-05	0.00117033	1.0,1.0	0.429,0.75	0.41
	FBgn0033159	Dscam1	2R	7317924	7381899	-	7354685	7354809	7356972	7357096	7348130	7348975	7361717	7361867	2,1	0,0	5,2	12,2	272	272	7.76574e-10	1.73098e-07	1.0,1.0	0.294,0.5	0.603
	FBgn0033159	Dscam1	2R	7317924	7381899	-	7354685	7354809	7357182	7357306	7348130	7348975	7361717	7361867	2,5	0,0	2,2	12,2	272	272	1.17539e-08	1.87139e-06	1.0,1.0	0.143,0.5	0.678
	FBgn0033159	Dscam1	2R	7317924	7381899	-	7354685	7354809	7357590	7357714	7348130	7348975	7361717	7361867	2,3	0,0	9,0	12,2	272	272	5.01454e-06	0.000413978	1.0,1.0	0.429,0.0	0.785
	FBgn0033159	Dscam1	2R	7317924	7381899	-	7354685	7354809	7357788	7357915	7348130	7348975	7361717	7361867	6,1	0,0	1,0	12,2	275	272	1.0794e-11	4.00998e-09	1.0,1.0	0.076,0.0	0.962
	FBgn0033159	Dscam1	2R	7317924	7381899	-	7354685	7354809	7358002	7358129	7348130	7348975	7361717	7361867	2,1	0,0	0,1	12,2	275	272	2.69118e-13	4.84482e-10	1.0,1.0	0.0,0.331	0.835
	FBgn0033159	Dscam1	2R	7317924	7381899	-	7354685	7354809	7358603	7358727	7348130	7348975	7361717	7361867	6,5	0,0	7,4	12,2	272	272	1.01623e-06	9.43826e-05	1.0,1.0	0.368,0.667	0.482
	FBgn0033159	Dscam1	2R	7317924	7381899	-	7354685	7354809	7359441	7359565	7348130	7348975	7361717	7361867	4,2	0,0	21,3	12,2	272	272	5.72255e-07	5.79349e-05	1.0,1.0	0.636,0.6	0.382
	FBgn0033159	Dscam1	2R	7317924	7381899	-	7354685	7354809	7359874	7360007	7348130	7348975	7361717	7361867	3,7	0,0	6,6	12,2	281	272	5.35314e-05	0.00314004	1.0,1.0	0.326,0.744	0.465
	FBgn0033159	Dscam1	2R	7317924	7381899	-	7354685	7354809	7360081	7360205	7348130	7348975	7361717	7361867	3,4	0,0	3,5	12,2	272	272	6.97626e-05	0.0037927	1.0,1.0	0.2,0.714	0.543
	FBgn0033159	Dscam1	2R	7317924	7381899	-	7354685	7354809	7360290	7360414	7348130	7348975	7361717	7361867	5,1	0,0	4,0	12,2	272	272	6.01572e-11	1.91558e-08	1.0,1.0	0.25,0.0	0.875
	FBgn0033159	Dscam1	2R	7317924	7381899	-	7354685	7354809	7360525	7360649	7348130	7348975	7361717	7361867	4,1	0,0	3,6	12,2	272	272	0.000220144	0.00791452	1.0,1.0	0.2,0.75	0.525
	FBgn0033159	Dscam1	2R	7317924	7381899	-	7356106	7356230	7357788	7357915	7348130	7348975	7361717	7361867	6,1	1,2	1,0	9,6	275	272	0.000256694	0.00893991	0.856,0.331	0.099,0.0	0.544
	FBgn0033159	Dscam1	2R	7317924	7381899	-	7356316	7356440	7357182	7357306	7348130	7348975	7361717	7361867	2,5	0,2	2,2	7,4	272	272	0.00170021	0.0314989	1.0,0.714	0.222,0.333	0.579
	FBgn0033159	Dscam1	2R	7317924	7381899	-	7356316	7356440	7357788	7357915	7348130	7348975	7361717	7361867	6,1	0,2	1,0	7,4	275	272	0.00010222	0.00455699	1.0,0.331	0.124,0.0	0.603
	FBgn0033159	Dscam1	2R	7317924	7381899	-	7363331	7363490	7363880	7364048	7361717	7361867	7368387	7368732	8,6	5,3	3,0	10,7	298	298	0.000540958	0.0143547	0.615,0.667	0.231,0.0	0.525
	FBgn0038826	Syp	3R	20756729	20810726	+	20800016	20800300	20802289	20802551	20798314	20798409	20804674	20805511	427,252	936,1040	154,111	1529,1080	298	298	5.85344e-06	0.000465976	0.313,0.195	0.092,0.093	0.162
	FBgn0041182	Tep2	2L	7693727	7701601	-	7697006	7697157	7697976	7698130	7696027	7696206	7698724	7698992	60,54	67,56	31,15	102,45	298	298	0.000137863	0.0056907	0.472,0.491	0.233,0.25	0.24
	FBgn0051363	Jupiter	3R	11590386	11619906	-	11592366	11592624	11593632	11593766	11590385	11591307	11619703	11619906	875,522	376,345	877,473	1066,433	282	298	0.000724321	0.0171757	0.711,0.615	0.465,0.536	0.162
	FBgn0051973	Cda5	2L	25402	65404	-	28014	28240	28410	28639	27052	27490	28732	28926	12,11	28,13	1,2	19,19	298	298	0.000790911	0.0175975	0.3,0.458	0.05,0.095	0.306
	FBgn0051973	Cda5	2L	25402	65404	-	30393	33270	33844	34288	28981	29068	34557	34604	106,73	3,4	75,44	13,15	298	298	0.00215005	0.0356112	0.972,0.948	0.852,0.746	0.161
	FBgn0053547	Rim	3R	17872748	17916578	-	17878777	17878997	17881177	17881427	17877488	17877666	17881775	17881901	12,8	0,1	4,5	10,1	298	298	0.0017066	0.0314989	1.0,0.889	0.286,0.833	0.385
	FBgn0263197	Patronin	2R	17519024	17535866	-	17528621	17528852	17529981	17530134	17527822	17528105	17531046	17531147	27,7	0,0	24,8	8,3	298	298	0.000400223	0.0115857	1.0,1.0	0.75,0.727	0.262
mxe_down	FBgn0010434	cora	2R	19229063	19243751	+	19237327	19237441	19237741	19237771	19236941	19237063	19238151	19238314	9,7	54,47	44,12	67,20	262	178	0.000441622	0.0123047	0.102,0.092	0.309,0.29	-0.202
	FBgn0013305	Nmda1	2R	12877094	12880230	-	12879051	12879146	12879196	12879222	12878384	12878710	12879447	12879656	29,22	58,26	29,15	12,3	174	243	0.000209384	0.00777863	0.411,0.542	0.771,0.875	-0.346
	FBgn0013305	Nmda1	2R	12877094	12880230	-	12879051	12879146	12879196	12879222	12878384	12878710	12879688	12879798	120,145	90,68	38,108	12,16	174	243	0.00139492	0.0268041	0.651,0.749	0.816,0.904	-0.16
	FBgn0032010	CG8086	2L	8244160	8257502	-	8250862	8250967	8251223	8251325	8250582	8250681	8252227	8252533	1,0	25,22	9,10	20,18	250	253	1.78656e-06	0.000153163	0.039,0.0	0.313,0.36	-0.317
	FBgn0032456	MRP	2L	12719045	12766546	+	12728020	12728241	12729184	12729405	12726745	12727116	12737958	12738176	64,33	49,31	59,37	17,11	298	298	0.00195624	0.034149	0.566,0.516	0.776,0.771	-0.233
	FBgn0033159	Dscam1	2R	7317924	7381899	-	7350580	7350704	7354685	7354809	7348130	7348975	7361717	7361867	0,0	6,5	12,2	4,2	272	272	1.65648e-09	3.35664e-07	0.0,0.0	0.75,0.5	-0.625
	FBgn0033159	Dscam1	2R	7317924	7381899	-	7350580	7350704	7355900	7356024	7348130	7348975	7361717	7361867	1,0	6,5	3,2	4,2	272	272	0.00189561	0.0335342	0.143,0.0	0.429,0.5	-0.393
	FBgn0033159	Dscam1	2R	7317924	7381899	-	7350580	7350704	7356106	7356230	7348130	7348975	7361717	7361867	1,2	6,5	9,6	4,2	272	272	0.00119745	0.0240353	0.143,0.286	0.692,0.75	-0.506
	FBgn0033159	Dscam1	2R	7317924	7381899	-	7350580	7350704	7356316	7356440	7348130	7348975	7361717	7361867	0,2	6,5	7,4	4,2	272	272	0.000711012	0.0171757	0.0,0.286	0.636,0.667	-0.508
	FBgn0033159	Dscam1	2R	7317924	7381899	-	7350580	7350704	7359015	7359139	7348130	7348975	7361717	7361867	0,1	6,5	3,4	4,2	272	272	0.000288	0.00958137	0.0,0.167	0.429,0.667	-0.465
	FBgn0033159	Dscam1	2R	7317924	7381899	-	7350580	7350704	7359666	7359790	7348130	7348975	7361717	7361867	1,0	6,5	3,3	4,2	272	272	0.000771304	0.0175432	0.143,0.0	0.429,0.6	-0.443
	FBgn0033159	Dscam1	2R	7317924	7381899	-	7358603	7358727	7359015	7359139	7348130	7348975	7361717	7361867	0,1	6,5	3,4	7,4	272	272	0.00198748	0.034149	0.0,0.167	0.3,0.5	-0.317
	FBgn0033159	Dscam1	2R	7317924	7381899	-	7363880	7364048	7365017	7365179	7361717	7361867	7368387	7368732	9,9	8,6	19,11	3,0	298	298	0.00100841	0.0212051	0.529,0.6	0.864,1.0	-0.367
	FBgn0041182	Tep2	2L	7693727	7701601	-	7696593	7696807	7697400	7697581	7696027	7696206	7698724	7698992	336,330	386,287	478,251	222,150	298	298	0.000746647	0.0175187	0.465,0.535	0.683,0.626	-0.155
	FBgn0264693	ens	3L	4122907	4134550	-	4128613	4128973	4130388	4130643	4126988	4127162	4131120	4131236	31,18	267,153	75,42	224,125	298	298	0.000560465	0.0146974	0.104,0.105	0.251,0.251	-0.147
	FBgn0265991	Zasp52	2R	15762565	15817004	-	15763925	15764835	15765122	15765447	15763645	15763829	15773815	15773966	262,266	343,243	624,404	364,202	298	298	0.000678149	0.0167955	0.433,0.523	0.632,0.667	-0.171
	FBgn0265991	Zasp52	2R	15762565	15817004	-	15763925	15764835	15765122	15767253	15763645	15763829	15773815	15773966	260,266	343,243	624,403	364,202	298	298	0.000720927	0.0171757	0.431,0.523	0.632,0.666	-0.172
	FBgn0265991	Zasp52	2R	15762565	15817004	-	15763925	15764835	15765122	15769551	15763645	15763829	15773815	15773966	260,266	343,243	634,403	364,202	298	298	0.00058354	0.0149507	0.431,0.523	0.635,0.666	-0.174

## Sheet: 4. 95Cb del vs WT
	GeneID	gene_symbol	seqnames	start	end	strand	exonStart_0base	exonEnd	upstreamES	upstreamEE	downstreamES	downstreamEE	IJC_SAMPLE_1	SJC_SAMPLE_1	IJC_SAMPLE_2	SJC_SAMPLE_2	IncFormLen	SkipFormLen	PValue	FDR	IncLevel1	IncLevel2	IncLevelDifference
se_up	FBgn0001248	Idh	3L	8356404	8360906	-	8358015	8358072	8356403	8357935	8360792	8360906	10,20	1,0	4,14	4,7	205	149	2.89152e-05	0.00220189	0.879,1.0	0.421,0.592	0.433
	FBgn0001987	Gli	2L	15756002	15762758	-	15762195	15762406	15760401	15760574	15762688	15762758	41,57	79,60	12,1	85,33	298	149	3.04307e-06	0.000374078	0.206,0.322	0.066,0.015	0.224
	FBgn0003137	Ppn	3R	28520665	28540324	-	28521814	28522231	28521541	28521700	28522481	28522632	316,213	62,30	112,100	103,73	298	149	1.90958e-14	1.45415e-11	0.718,0.78	0.352,0.407	0.37
	FBgn0003301	rut	X	14787478	14826073	-	14791247	14792353	14790180	14790878	14793125	14794152	38,17	2,0	16,16	9,3	298	149	0.000679426	0.0295647	0.905,1.0	0.471,0.727	0.354
	FBgn0003429	slo	3R	24662491	24711595	+	24702087	24702162	24699375	24699426	24703117	24703307	4,8	2,0	3,4	13,5	223	149	0.00060263	0.0275342	0.572,1.0	0.134,0.348	0.545
	FBgn0003429	slo	3R	24662491	24711595	+	24703020	24703053	24699375	24699426	24703117	24703307	56,28	2,0	12,8	13,5	181	149	8.66035e-09	2.3276e-06	0.958,1.0	0.432,0.568	0.479
	FBgn0004838	Hrb27C	2L	6920704	6932057	+	6922730	6922826	6920703	6920861	6923783	6924400	253,183	5,6	849,353	129,50	244	149	7.82356e-07	0.000111706	0.969,0.949	0.801,0.812	0.152
	FBgn0004854	B-H2	X	17314581	17324175	+	17320734	17320774	17314580	17315911	17320838	17321091	7,2	4,2	1,1	13,8	188	149	0.000387281	0.0188243	0.581,0.442	0.057,0.09	0.438
	FBgn0005278	Sam-S	2L	106903	114432	+	111004	111117	110754	110877	111906	112019	231,167	135,95	126,74	152,131	261	149	2.28915e-05	0.0018677	0.494,0.501	0.321,0.244	0.215
	FBgn0013733	shot	2R	13864237	13942110	-	13895109	13895307	13894838	13894969	13899449	13899671	142,80	136,95	95,93	277,173	298	149	0.0010922	0.0430195	0.343,0.296	0.146,0.212	0.141
	FBgn0014133	bif	X	11678970	11694740	+	11692798	11693177	11689200	11689543	11693546	11694740	260,194	123,106	180,111	202,109	298	149	0.000452452	0.0210944	0.514,0.478	0.308,0.337	0.173
	FBgn0015513	mbc	3R	23781765	23801634	+	23796384	23796498	23795065	23795240	23797098	23799497	38,28	27,21	9,5	29,20	262	149	6.69626e-05	0.00443409	0.445,0.431	0.15,0.124	0.301
	FBgn0019660	lncRNA:roX2	X	11579065	11580432	+	11579385	11579399	11579064	11579124	11579669	11580100	22,23	112,105	4,6	103,180	162	149	0.000666684	0.0295647	0.153,0.168	0.034,0.03	0.129
	FBgn0020887	Su(z)12	3L	19918242	19923462	-	19919358	19919520	19918241	19919290	19920153	19920986	54,27	54,35	19,6	53,96	298	149	3.96722e-06	0.000464775	0.333,0.278	0.152,0.03	0.214
	FBgn0023083	fray	3R	18573091	18589459	+	18577566	18577584	18573090	18573525	18586278	18589453	239,189	0,0	156,81	65,19	166	149	0	0	1.0,1.0	0.683,0.793	0.262
	FBgn0024189	sns	2R	8798489	8856091	+	8834951	8835101	8833792	8833981	8841356	8841511	8,3	1,0	9,10	12,5	298	149	0.00020752	0.0110251	0.8,1.0	0.273,0.5	0.514
	FBgn0028577	hfp	3L	1496853	1502590	-	1501345	1501406	1500244	1500388	1501798	1501892	12,8	1,1	5,5	6,7	209	149	0.000121184	0.00700871	0.895,0.851	0.373,0.337	0.518
	FBgn0028577	hfp	3L	1496853	1502590	-	1501350	1501406	1500244	1500388	1501798	1501892	9,8	1,1	5,1	6,7	204	149	6.89493e-05	0.00450042	0.868,0.854	0.378,0.094	0.625
	FBgn0030872	Ucp4A	X	17844949	17848223	+	17846682	17846792	17845489	17845758	17846930	17847419	82,65	0,3	55,62	10,9	258	149	0.000768999	0.0326648	1.0,0.926	0.761,0.799	0.183
	FBgn0031738	CG9171	2L	5767002	5800253	-	5787964	5787984	5770950	5771209	5800043	5800173	24,5	0,0	15,7	5,6	168	149	4.84641e-05	0.00330496	1.0,1.0	0.727,0.509	0.382
	FBgn0031738	CG9171	2L	5767002	5800253	-	5799117	5799411	5770950	5771209	5800043	5800173	22,14	0,0	11,24	5,6	298	149	4.55699e-06	0.000516963	1.0,1.0	0.524,0.667	0.404
	FBgn0033504	CAP	2R	10269016	10307024	+	10294393	10294517	10271883	10272080	10294611	10294765	5,3	2,0	0,0	8,3	272	149	1.94384e-05	0.00164471	0.578,1.0	0.0,0.0	0.789
	FBgn0033749	achi	2R	12511534	12515062	-	12512872	12513259	12512681	12512783	12513359	12513508	12,10	1,1	8,10	7,10	298	149	0.000241125	0.0123787	0.857,0.833	0.364,0.333	0.496
	FBgn0034420	CG10737	2R	19164143	19178223	+	19174576	19174783	19174338	19174365	19174881	19175086	207,136	80,47	161,167	142,115	298	149	0.000834474	0.0340233	0.564,0.591	0.362,0.421	0.186
	FBgn0038826	Syp	3R	20756729	20810726	+	20800016	20800300	20798290	20798409	20802289	20802551	920,711	898,948	874,232	1703,896	298	149	2.05672e-05	0.00170858	0.339,0.273	0.204,0.115	0.147
	FBgn0038826	Syp	3R	20756729	20810726	+	20800016	20800300	20798290	20798409	20805946	20806223	260,135	509,260	163,65	670,398	298	149	0.000408589	0.0194463	0.203,0.206	0.108,0.075	0.113
	FBgn0039709	Cad99C	3R	29841657	29854699	+	29842724	29842873	29841656	29841790	29845598	29845760	152,138	1,9	201,108	100,49	297	149	1.11022e-16	1.01452e-13	0.987,0.885	0.502,0.525	0.422
	FBgn0039920	CG11360	4	671142	690650	+	671246	671387	671141	671166	680439	681135	10,22	0,1	7,4	7,4	289	149	3.40521e-07	5.18613e-05	1.0,0.919	0.34,0.34	0.619
	FBgn0041182	Tep2	2L	7693727	7701601	-	7696593	7696807	7696027	7696206	7697006	7697157	211,185	30,17	68,34	68,55	298	149	0	0	0.779,0.845	0.333,0.236	0.528
	FBgn0041182	Tep2	2L	7693727	7701601	-	7696593	7696807	7696027	7696206	7697976	7698130	207,183	50,29	46,25	31,14	298	149	0.000281991	0.0142914	0.674,0.759	0.426,0.472	0.268
	FBgn0053208	Mical	3R	10001554	10042895	-	10037815	10037890	10027329	10027381	10042791	10042895	23,12	0,0	26,19	12,8	223	149	1.05263e-08	2.67192e-06	1.0,1.0	0.591,0.613	0.398
	FBgn0053208	Mical	3R	10001554	10042895	-	10041971	10041998	10027329	10027381	10042791	10042821	2,5	0,0	20,24	12,8	175	149	7.05218e-09	2.1481e-06	1.0,1.0	0.587,0.719	0.347
	FBgn0085376	CG34347	3R	31311157	31371748	+	31366842	31367522	31361118	31362358	31370235	31371748	25,18	0,0	44,39	10,4	298	149	8.58e-05	0.00544473	1.0,1.0	0.688,0.83	0.241
	FBgn0086690	Plp	3L	15066081	15094724	-	15074324	15074492	15072528	15073194	15074683	15075847	264,214	11,15	331,114	82,35	298	149	1.14502e-08	2.75347e-06	0.923,0.877	0.669,0.62	0.255
	FBgn0261545	CG42663	2R	12705172	12751545	+	12738435	12738504	12734920	12735119	12748912	12749461	26,16	2,0	21,23	12,6	217	149	0.000415069	0.0195511	0.899,1.0	0.546,0.725	0.314
	FBgn0261788	Ank2	3L	7655389	7718395	-	7666165	7693855	7663692	7665982	7696643	7696724	14,18	0,0	24,21	12,7	298	149	4.78462e-12	3.12299e-09	1.0,1.0	0.5,0.6	0.45
	FBgn0261836	Msp300	2L	5100877	5207002	+	5141310	5141517	5139778	5140921	5141652	5141890	351,273	81,47	315,218	148,113	298	149	1.72363e-05	0.00153567	0.684,0.744	0.516,0.491	0.21
	FBgn0263077	CG43340	2R	7623242	7651787	+	7640831	7647677	7640116	7640617	7648296	7648510	56,35	75,58	16,18	93,83	298	149	0.000223075	0.0115821	0.272,0.232	0.079,0.098	0.164
	FBgn0263077	CG43340	2R	7623242	7651787	+	7647305	7647677	7640116	7640617	7648296	7648510	96,70	75,58	30,24	93,83	298	149	6.48628e-08	1.34708e-05	0.39,0.376	0.139,0.126	0.251
	FBgn0263117	CG34377	3R	22308663	22324094	-	22323138	22323364	22318345	22318989	22323724	22324094	12,6	0,1	15,21	7,6	298	149	0.000772115	0.0326648	1.0,0.75	0.517,0.636	0.298
	FBgn0263197	Patronin	2R	17519024	17535866	-	17521831	17521906	17520645	17520928	17522852	17522960	18,28	0,1	22,26	8,4	223	149	0.00028464	0.0142914	1.0,0.949	0.648,0.813	0.244
	FBgn0285926	Imp	X	10787869	10824277	-	10799750	10799924	10798618	10798993	10813248	10814093	74,43	12,15	40,21	31,42	298	149	0.00014854	0.00827658	0.755,0.589	0.392,0.2	0.376
	FBgn0287209	Gfat1	3R	4126442	4137882	+	4134145	4134172	4133463	4133919	4134366	4134390	163,85	149,96	50,59	157,148	175	149	2.51831e-06	0.000328747	0.482,0.43	0.213,0.253	0.223
se_down	FBgn0002921	Atpalpha	3R	20948714	20976239	+	20959236	20959380	20957733	20958167	20963724	20963856	238,159	549,380	473,199	440,173	292	149	1.1938e-07	2.2727e-05	0.181,0.176	0.354,0.37	-0.183
	FBgn0003392	shi	X	15892116	15906716	+	15899443	15899455	15898954	15899074	15901543	15901747	237,169	153,122	300,111	92,28	160	149	0.000110869	0.00657871	0.591,0.563	0.752,0.787	-0.193
	FBgn0004049	yrt	3R	13428867	13434984	-	13430097	13430750	13428866	13429769	13430922	13431089	37,18	29,26	66,67	18,23	298	149	0.000804877	0.0332765	0.389,0.257	0.647,0.593	-0.297
	FBgn0004167	kst	3L	3336860	3368133	+	3366443	3366962	3366199	3366310	3367514	3368133	163,120	224,136	296,165	140,100	298	149	1.08506e-05	0.00105482	0.267,0.306	0.514,0.452	-0.197
	FBgn0004167	kst	3L	3336860	3368133	+	3366443	3367010	3366199	3366310	3367514	3368133	199,155	224,136	374,199	140,100	298	149	1.74775e-05	0.00153567	0.308,0.363	0.572,0.499	-0.2
	FBgn0004169	up	X	13593474	13602578	-	13597380	13597404	13596375	13596748	13599415	13599457	6462,5108	3578,2465	4307,3709	1203,649	172	149	1.41827e-07	2.49234e-05	0.61,0.642	0.756,0.832	-0.168
	FBgn0004169	up	X	13593474	13602578	-	13598173	13598176	13597380	13597404	13599415	13599457	2511,1854	4198,3354	3061,2217	2586,2045	151	149	4.63897e-06	0.000516963	0.371,0.353	0.539,0.517	-0.166
	FBgn0005640	Eip63E	3L	3515751	3610521	+	3588041	3588080	3578288	3578480	3593328	3593546	121,76	24,9	183,77	3,4	187	149	0.00128855	0.0494738	0.801,0.871	0.98,0.939	-0.123
	FBgn0011817	nmo	3L	7979046	8054147	+	8048069	8048443	8047506	8047600	8049868	8050333	35,65	59,92	146,103	88,70	298	149	0.000592971	0.0273665	0.229,0.261	0.453,0.424	-0.194
	FBgn0013576	mtd	3R	5270116	5350443	-	5335713	5336635	5334404	5335060	5349467	5350010	1,1	12,3	7,10	3,1	298	149	5.24071e-06	0.000556856	0.04,0.143	0.538,0.833	-0.594
	FBgn0013733	shot	2R	13864237	13942110	-	13899449	13899671	13894838	13894969	13901436	13901572	151,97	54,36	283,177	30,25	298	149	3.52361e-05	0.00255546	0.583,0.574	0.825,0.78	-0.224
	FBgn0013995	Calx	3R	20978183	21015613	+	20986146	20986382	20985978	20986083	20992240	20994423	18,9	25,13	24,27	2,0	298	149	4.89727e-11	2.48618e-08	0.265,0.257	0.857,1.0	-0.667
	FBgn0016930	Dyrk2	2L	14184478	14234126	-	14229531	14229536	14222016	14222081	14233647	14234108	40,41	38,23	151,43	18,11	153	149	2.5861e-05	0.00203722	0.506,0.635	0.891,0.792	-0.271
	FBgn0027580	PCB	2R	9850703	9861543	-	9853682	9853730	9852547	9853205	9854510	9856020	294,266	451,386	573,429	289,231	196	149	1.11765e-11	6.38318e-09	0.331,0.344	0.601,0.585	-0.255
	FBgn0028577	hfp	3L	1496853	1502590	-	1499771	1499879	1499042	1499337	1501350	1501406	0,2	9,6	2,6	0,3	256	149	0.00079279	0.0332317	0.0,0.162	1.0,0.538	-0.688
	FBgn0030052	CG12065	X	8574306	8588528	+	8584842	8584923	8584455	8584575	8585809	8585918	10,7	48,41	57,53	47,76	229	149	2.72622e-05	0.0021112	0.119,0.1	0.441,0.312	-0.267
	FBgn0032010	CG8086	2L	8244160	8257502	-	8251223	8251325	8250862	8250967	8252227	8252533	1,0	17,13	9,5	9,9	250	149	2.5662e-05	0.00203722	0.034,0.0	0.373,0.249	-0.294
	FBgn0033504	CAP	2R	10269016	10307024	+	10294149	10294182	10293860	10293933	10294611	10294765	9,4	16,12	62,17	16,8	181	149	3.08667e-05	0.00231197	0.316,0.215	0.761,0.636	-0.433
	FBgn0034194	CG15611	2R	17108844	17114360	+	17109942	17110074	17108843	17109276	17110166	17110500	86,72	36,47	87,86	6,3	280	149	2.18465e-10	9.07425e-08	0.56,0.449	0.885,0.938	-0.407
	FBgn0035049	Mmp1	2R	24671294	24688184	-	24672550	24672851	24671293	24672306	24675062	24675141	46,54	47,44	179,149	67,33	298	149	9.52249e-05	0.00596004	0.329,0.38	0.572,0.693	-0.278
	FBgn0035049	Mmp1	2R	24671294	24688184	-	24672550	24673316	24671293	24672306	24675062	24675141	39,45	47,44	151,138	67,33	298	149	0.000152798	0.00841126	0.293,0.338	0.53,0.676	-0.287
	FBgn0035438	PHGPx	3L	3326265	3328626	+	3327342	3327553	3326264	3326367	3327859	3328183	190,203	730,493	342,373	526,446	298	149	6.48261e-05	0.00435574	0.115,0.171	0.245,0.295	-0.127
	FBgn0035625	Blimp-1	3L	5630983	5652094	+	5645265	5645304	5644734	5644851	5645674	5648237	0,0	5,6	10,9	26,37	187	149	0.000105394	0.00642062	0.0,0.0	0.235,0.162	-0.199
	FBgn0036952	CG6933	3L	20218500	20220420	-	20220060	20220235	20218501	20219663	20220344	20220420	432,247	549,325	160,64	62,37	298	149	1.21112e-05	0.00115284	0.282,0.275	0.563,0.464	-0.235
	FBgn0036952	CG6933	3L	20218500	20220420	-	20220096	20220235	20218501	20219663	20220344	20220420	1371,890	549,325	497,338	62,37	287	149	8.53148e-11	3.89803e-08	0.565,0.587	0.806,0.826	-0.24
	FBgn0037643	ScsbetaA	3R	8938724	8943027	+	8941313	8941316	8940921	8941189	8941407	8941832	124,129	777,634	307,144	522,295	151	149	7.95894e-10	2.79726e-07	0.136,0.167	0.367,0.325	-0.194
	FBgn0038404	CG8925	3R	16171991	16180475	+	16174307	16174499	16171990	16172519	16177542	16177942	8,4	49,23	27,23	32,16	298	149	3.24031e-05	0.0023879	0.075,0.08	0.297,0.418	-0.28
	FBgn0039790	CG2246	3R	30592971	30601489	-	30601200	30601308	30595389	30595626	30601416	30601489	98,60	103,74	105,29	42,10	256	149	7.0943e-05	0.00456533	0.356,0.321	0.593,0.628	-0.272
	FBgn0041182	Tep2	2L	7693727	7701601	-	7697006	7697157	7696027	7696206	7697976	7698130	32,17	50,29	69,57	31,14	298	149	8.55032e-06	0.000849269	0.242,0.227	0.527,0.671	-0.364
	FBgn0041182	Tep2	2L	7693727	7701601	-	7697006	7697157	7696027	7696206	7698373	7698551	31,19	24,14	68,55	15,8	298	149	0.000156051	0.00848807	0.392,0.404	0.694,0.775	-0.336
	FBgn0041182	Tep2	2L	7693727	7701601	-	7697006	7697157	7696593	7696807	7698724	7698992	41,42	179,105	78,34	29,24	298	149	8.3414e-09	2.3276e-06	0.103,0.167	0.574,0.415	-0.359
	FBgn0042105	CG18748	3R	7786170	7787923	-	7787517	7787667	7787243	7787452	7787728	7787923	29,20	11,2	8,5	0,0	298	149	0.000108833	0.00654285	0.569,0.833	1.0,1.0	-0.299
	FBgn0043070	MESK2	2R	21502097	21517241	+	21507294	21507722	21502096	21502479	21510117	21510201	264,200	47,49	301,234	21,12	298	149	4.71847e-05	0.00326647	0.737,0.671	0.878,0.907	-0.189
	FBgn0043070	MESK2	2R	21502097	21517241	+	21507321	21507722	21502096	21502479	21510117	21510201	209,177	47,49	280,217	21,12	298	149	3.11118e-06	0.000374078	0.69,0.644	0.87,0.9	-0.218
	FBgn0052311	zormin	3L	2117466	2151700	-	2124181	2124613	2118766	2119129	2125238	2126670	114,72	102,89	229,244	124,100	298	149	0.000636444	0.0287912	0.358,0.288	0.48,0.55	-0.192
	FBgn0053523	CG33523	3L	5923862	5930120	+	5926736	5926834	5925400	5925624	5928223	5928296	13,2	53,39	6,7	5,4	246	149	0.000908281	0.0364029	0.129,0.03	0.421,0.515	-0.388
	FBgn0083962	CG34126	2L	4981614	4992702	+	4989389	4989410	4988733	4988848	4990307	4990450	48,22	81,53	55,53	40,35	169	149	0.000401647	0.0193171	0.343,0.268	0.548,0.572	-0.255
	FBgn0260486	Ziz	2L	7472513	7496307	-	7492184	7492226	7483510	7483627	7495512	7496307	3,1	66,43	23,8	56,25	190	149	1.89076e-05	0.00162998	0.034,0.018	0.244,0.201	-0.197
	FBgn0261015	Pif1A	3R	8774286	8801176	-	8793977	8794091	8793103	8793367	8796704	8796936	132,117	155,90	294,212	115,84	262	149	9.75191e-05	0.00602115	0.326,0.425	0.592,0.589	-0.215
	FBgn0261509	haf	2L	1555129	1609389	+	1605098	1605485	1604760	1604885	1606389	1608404	43,44	4,11	51,58	0,2	298	149	0.00076675	0.0326648	0.843,0.667	1.0,0.935	-0.213
	FBgn0261649	tinc	3R	17811541	17872507	+	17813530	17813617	17811540	17811804	17836150	17836236	89,58	11,7	71,9	0,0	235	149	0.000841459	0.0340233	0.837,0.84	1.0,1.0	-0.161
	FBgn0261649	tinc	3R	17811541	17872507	+	17821893	17821938	17811540	17811804	17836150	17836236	5,4	11,7	6,1	0,0	193	149	2.30119e-08	5.00674e-06	0.26,0.306	1.0,1.0	-0.717
	FBgn0261988	Gprk2	3R	31405245	31457873	+	31410353	31410401	31405244	31405956	31433458	31433888	42,24	186,109	451,200	29,20	196	149	0	0	0.147,0.143	0.922,0.884	-0.758
	FBgn0262081	Csk	3R	11633278	11650706	-	11642275	11643205	11637069	11637614	11650084	11650706	36,25	108,102	106,88	123,87	298	149	8.47509e-06	0.000849269	0.143,0.109	0.301,0.336	-0.193
	FBgn0263346	smash	3R	4659579	4712193	+	4680778	4680837	4659578	4660399	4697190	4697542	18,4	11,5	74,25	0,0	207	149	7.02231e-10	2.67375e-07	0.541,0.365	1.0,1.0	-0.547
	FBgn0263346	smash	3R	4659579	4712193	+	4680778	4680837	4670796	4670850	4697190	4697542	55,40	106,111	205,74	43,13	207	149	0	0	0.272,0.206	0.774,0.804	-0.55
	FBgn0263396	sqd	3R	13634862	13646304	-	13636970	13637078	13636365	13636525	13642298	13642427	190,152	156,137	471,190	153,82	256	149	1.42756e-05	0.0013045	0.415,0.392	0.642,0.574	-0.205
	GeneID	gene_symbol	seqnames	start	end	strand	riExonStart_0base	riExonEnd	upstreamES	upstreamEE	downstreamES	downstreamEE	IJC_SAMPLE_1	SJC_SAMPLE_1	IJC_SAMPLE_2	SJC_SAMPLE_2	IncFormLen	SkipFormLen	PValue	FDR	IncLevel1	IncLevel2	IncLevelDifference
ri_up	FBgn0010551	Phb2	2R	18819467	18822250	+	18821183	18821839	18821183	18821283	18821489	18821839	22,10	0,0	38,17	7,13	298	149	3.46609e-07	6.76517e-05	1.0,1.0	0.731,0.395	0.437
	FBgn0015521	RpS21	2L	2856070	2857029	+	2856376	2856705	2856376	2856568	2856630	2856705	153,70	13,1	35,34	885,531	210	149	0	0	0.893,0.98	0.027,0.043	0.901
	FBgn0029666	CG10803	X	3485650	3490915	+	3486312	3487530	3486312	3487343	3487403	3487530	7,6	24,7	0,0	21,16	208	149	0.00126328	0.0380927	0.173,0.38	0.0,0.0	0.276
	FBgn0029854	CG3566	X	6274972	6276724	-	6274971	6276296	6274971	6275390	6276227	6276296	12,14	7,15	3,1	17,19	298	149	5.26548e-05	0.00344011	0.462,0.318	0.081,0.026	0.337
	FBgn0031515	CG9664	2L	3291245	3294706	-	3292173	3292576	3292173	3292298	3292459	3292576	7,7	0,1	5,12	15,6	298	149	3.87214e-05	0.00327981	1.0,0.778	0.143,0.5	0.568
	FBgn0033313	Cirl	2R	8614722	8625203	+	8615902	8616516	8615902	8616156	8616326	8616516	7,3	0,0	10,6	10,1	298	149	8.26463e-05	0.00511537	1.0,1.0	0.333,0.75	0.459
	FBgn0033607	CG9062	2R	11280484	11283971	-	11283683	11283971	11283683	11283850	11283913	11283971	9,4	2,5	1,0	10,1	211	149	1.21513e-05	0.00142899	0.761,0.361	0.066,0.0	0.528
	FBgn0035099	CG6845	3L	146433	149056	+	146771	147398	146771	147082	147137	147398	6,2	2,1	2,0	5,6	203	149	0.000429083	0.0174001	0.688,0.595	0.227,0.0	0.528
	FBgn0039637	Ctl2	3R	29123370	29128247	+	29123415	29124104	29123415	29123499	29123800	29124104	2,1	0,0	0,0	16,5	298	149	6.52358e-09	3.83587e-06	1.0,1.0	0.0,0.0	1
	FBgn0052016	4E-T	4	951542	958392	-	958005	958392	958005	958123	958313	958392	7,10	0,0	13,0	9,2	298	149	1.42682e-06	0.000186437	1.0,1.0	0.419,0.0	0.79
	FBgn0085443	spri	X	10490069	10585422	-	10584909	10585422	10584909	10585073	10585325	10585422	17,5	6,0	0,2	6,5	298	149	4.17177e-05	0.00327981	0.586,1.0	0.0,0.167	0.709
	FBgn0261822	Bsg	2L	8083420	8116531	+	8107747	8116531	8107747	8107880	8110480	8116531	101,49	0,2	89,47	12,9	298	149	4.74122e-05	0.00327981	1.0,0.925	0.788,0.723	0.207
	FBgn0263507	lncRNA:CR43496	X	6758610	6759491	-	6758609	6759491	6758609	6758953	6759424	6759491	27,17	0,0	16,12	3,8	298	149	1.4588e-05	0.00155959	1.0,1.0	0.727,0.429	0.422
	FBgn0266176	pre-mod(mdg4)-J	3R	21355692	21359768	-	21355691	21356704	21355691	21356251	21356317	21356704	1,4	0,2	0,0	13,5	214	149	0.00124533	0.0380927	1.0,0.582	0.0,0.0	0.791
ri_down	FBgn0020647	KrT95D	3R	23997538	24031827	-	24030493	24031827	24030493	24031031	24031711	24031827	1,0	11,8	14,12	7,8	298	149	1.3633e-07	5.34413e-05	0.043,0.0	0.5,0.429	-0.443
	FBgn0025702	Srpk79D	3L	22273985	22284335	+	22282903	22283423	22282903	22283149	22283202	22283423	2,0	13,22	4,5	5,7	201	149	0.00078791	0.0289557	0.102,0.0	0.372,0.346	-0.308
	FBgn0036992	Hpd	3L	20438166	20439872	-	20439527	20439872	20439527	20439554	20439771	20439872	5,13	34,12	6,9	1,1	298	149	9.23404e-05	0.00542962	0.068,0.351	0.75,0.818	-0.575
	FBgn0039161	CG13606	3R	24172628	24184144	+	24180586	24181420	24180586	24180685	24180906	24181420	28,12	236,206	187,114	498,422	298	149	0.000471969	0.0179044	0.056,0.028	0.158,0.119	-0.097
	GeneID	gene_symbol	seqnames	start	end	strand	longExonStart_0base	longExonEnd	shortES	shortEE	flankingES	flankingEE	IJC_SAMPLE_1	SJC_SAMPLE_1	IJC_SAMPLE_2	SJC_SAMPLE_2	IncFormLen	SkipFormLen	PValue	FDR	IncLevel1	IncLevel2	IncLevelDifference
a5ss_up	FBgn0000083	AnxB9	3R	21065241	21070917	+	21065240	21065401	21065240	21065285	21067445	21067499	39,12	33,34	3,0	48,47	264	149	1.06443e-06	0.000204371	0.4,0.166	0.034,0.0	0.266
	FBgn0000083	AnxB9	3R	21065241	21070917	+	21065240	21065401	21065240	21065310	21067445	21067499	39,12	10,7	3,0	9,10	239	149	2.09907e-06	0.000310294	0.709,0.517	0.172,0.0	0.527
	FBgn0001987	Gli	2L	15756002	15762758	-	15762195	15762758	15762688	15762758	15760401	15760574	41,58	79,60	14,1	85,33	298	149	1.26652e-05	0.00121586	0.206,0.326	0.076,0.015	0.221
	FBgn0004657	mys	X	8061645	8070237	+	8061644	8061870	8061644	8061725	8063839	8064459	76,75	40,22	41,30	53,94	293	149	3.61482e-06	0.000462697	0.491,0.634	0.282,0.14	0.352
	FBgn0004838	Hrb27C	2L	6920704	6932057	+	6921638	6921798	6921638	6921673	6922730	6922826	6,10	0,0	25,4	4,10	273	149	0.000215705	0.0115578	1.0,1.0	0.773,0.179	0.524
	FBgn0028504	CG12182	3L	2595842	2599579	-	2599124	2599579	2599264	2599579	2597193	2599070	5,7	2,6	0,0	7,7	288	149	9.96172e-06	0.00102655	0.564,0.376	0.0,0.0	0.47
	FBgn0031139	CG11227	X	20930972	20933559	-	20933320	20933559	20933353	20933559	20930971	20933263	14,7	6,8	1,0	1,4	181	149	0.00116598	0.0400959	0.658,0.419	0.452,0.0	0.313
	FBgn0031319	CG4896	2L	1177690	1182454	+	1177689	1177868	1177689	1177861	1177947	1178044	5,8	19,12	0,1	25,8	155	149	0.000248453	0.0130099	0.202,0.391	0.0,0.107	0.243
	FBgn0031769	CG9135	2L	6050800	6053877	+	6050838	6051067	6050838	6050921	6051616	6052022	1,2	0,0	10,3	163,84	294	149	8.79115e-06	0.0010122	1.0,1.0	0.03,0.018	0.976
	FBgn0036302	sowah	3L	12537513	12572542	-	12539621	12540146	12540056	12540146	12538549	12538576	74,51	101,73	24,20	135,80	298	149	3.85074e-05	0.00295737	0.268,0.259	0.082,0.111	0.167
	FBgn0036663	CG9674	3L	16787573	16807731	-	16800071	16800189	16800092	16800189	16799483	16799954	22,11	1,2	4,0	21,1	169	149	5.00418e-10	1.15296e-07	0.951,0.829	0.144,0.0	0.818
	FBgn0037234	CG9795	3R	4319683	4326379	+	4324872	4325489	4324872	4325461	4325696	4326093	20,31	0,0	28,21	10,4	176	149	8.44929e-05	0.00540754	1.0,1.0	0.703,0.816	0.241
	FBgn0039349	Ssadh	3R	25624805	25626924	-	25626731	25626924	25626742	25626924	25626343	25626645	72,36	0,0	46,77	6,15	159	149	0.000742184	0.0305356	1.0,1.0	0.878,0.828	0.147
	FBgn0039920	CG11360	4	671142	690650	+	671141	671616	671141	671166	680439	681135	7,8	0,1	4,2	7,4	298	149	2.06876e-06	0.000310294	1.0,0.8	0.222,0.2	0.689
	FBgn0052016	4E-T	4	951542	958392	-	958288	958392	958313	958392	958005	958123	1,2	0,0	2,0	9,2	173	149	1.25633e-12	5.78916e-10	1.0,1.0	0.161,0.0	0.919
	FBgn0052529	Hers	X	19866146	19908108	+	19887352	19887492	19887352	19887413	19899011	19899972	12,16	0,1	27,12	3,12	227	149	0.00100496	0.0373457	1.0,0.913	0.855,0.396	0.331
	FBgn0052677	X11Lbeta	X	10627737	10710947	+	10704756	10706013	10704756	10705998	10706951	10707082	10,5	1,1	4,4	6,6	163	149	0.0003892	0.0184216	0.901,0.82	0.379,0.379	0.482
	FBgn0259170	alpha-Man-Ia	X	10266792	10325958	-	10325783	10325958	10325790	10325958	10323565	10324318	5,4	10,5	0,1	12,3	155	149	0.00102605	0.0375241	0.325,0.435	0.0,0.243	0.259
	FBgn0262975	cnc	3R	23185580	23226711	-	23221761	23221961	23221845	23221961	23220416	23220643	16,18	15,21	9,1	35,42	232	149	2.3478e-05	0.00200346	0.407,0.355	0.142,0.015	0.302
	FBgn0263289	scrib	3R	26536350	26604051	+	26536349	26536601	26536349	26536397	26537370	26537784	79,42	20,8	55,26	35,22	298	149	0.000956905	0.0361428	0.664,0.724	0.44,0.371	0.288
	FBgn0263289	scrib	3R	26536350	26604051	+	26536349	26536592	26536349	26536531	26537370	26537784	11,3	6,2	11,4	80,32	209	149	2.95751e-05	0.00243361	0.567,0.517	0.089,0.082	0.457
	FBgn0263289	scrib	3R	26536350	26604051	+	26536349	26536601	26536349	26536531	26537370	26537784	79,42	6,2	55,26	80,32	218	149	0	0	0.9,0.935	0.32,0.357	0.579
	FBgn0263980	Stacl	2R	15401096	15471884	+	15415124	15416838	15415124	15416831	15419350	15419551	10,7	2,0	10,1	20,8	155	149	2.15482e-06	0.000310294	0.828,1.0	0.325,0.107	0.698
	FBgn0264357	SNF4Agamma	3R	21140739	21214269	+	21199180	21199763	21199180	21199396	21200759	21201408	2,1	0,0	3,4	7,6	298	149	1.39977e-11	5.37511e-09	1.0,1.0	0.176,0.25	0.787
a5ss_down	FBgn0003435	sm	2R	19517864	19631508	-	19564440	19564512	19564461	19564512	19546011	19546059	21,18	13,4	9,7	0,1	169	149	0.000909253	0.0354773	0.587,0.799	1.0,0.861	-0.237
	FBgn0010328	woc	3R	27256595	27264055	-	27263734	27264055	27263776	27264055	27262554	27263451	163,131	135,114	145,77	54,21	190	149	8.10166e-05	0.00540754	0.486,0.474	0.678,0.742	-0.23
	FBgn0010611	Hmgs	2R	16336090	16341242	+	16338301	16338436	16338301	16338421	16339446	16341242	32,15	10,4	13,10	1,0	163	149	0.000874096	0.0347227	0.745,0.774	0.922,1.0	-0.202
	FBgn0020280	laf	3R	4876005	4878533	-	4876802	4878425	4876808	4878425	4876004	4876731	1,1	9,7	2,2	1,0	154	149	4.4786e-05	0.00332861	0.097,0.121	0.659,1.0	-0.721
	FBgn0025741	PlexA	4	1009895	1027101	-	1026769	1027101	1026962	1027101	1022241	1023680	33,32	72,58	67,20	46,14	298	149	0.000852135	0.0344442	0.186,0.216	0.421,0.417	-0.218
	FBgn0028875	nAChRalpha5	2L	14040170	14094401	+	14040169	14040465	14040169	14040394	14041320	14042234	1,3	6,12	6,4	2,1	219	149	0.000276884	0.0140367	0.102,0.145	0.671,0.731	-0.578
	FBgn0030674	HUWE1	X	15712628	15731935	+	15713900	15714393	15713900	15714381	15714716	15714956	23,28	197,173	100,40	205,89	160	149	4.0564e-06	0.000491892	0.098,0.131	0.312,0.295	-0.189
	FBgn0030735	CG3632	X	16296671	16303308	+	16296670	16296907	16296670	16296883	16297649	16297784	3,0	8,4	2,2	0,1	172	149	0.000161323	0.00906558	0.245,0.0	1.0,0.634	-0.694
	FBgn0030897	Frq1	X	18155369	18174744	+	18155368	18155732	18155368	18155590	18161012	18161292	2,0	6,7	8,1	2,0	290	149	8.29495e-05	0.00540754	0.146,0.0	0.673,1.0	-0.764
	FBgn0037094	CG7611	3L	21523186	21528163	+	21523185	21523400	21523185	21523298	21524721	21525716	10,6	17,9	12,11	1,4	250	149	0.00112892	0.0394096	0.26,0.284	0.877,0.621	-0.477
	FBgn0037130	Syn1	3L	21745359	21770534	-	21769917	21770534	21770445	21770534	21760957	21761265	41,18	5,6	23,10	0,0	298	149	0.00040684	0.0184216	0.804,0.6	1.0,1.0	-0.298
	FBgn0037138	P5CDh1	3L	21836665	21841356	-	21840050	21840127	21840098	21840127	21839665	21839831	2,3	4,7	10,5	0,1	196	149	1.33148e-06	0.000235979	0.275,0.246	1.0,0.792	-0.635
	FBgn0038947	Sar1	3R	22356685	22360711	+	22356684	22356798	22356684	22356749	22357530	22357671	3,7	128,55	14,19	28,44	197	149	1.02477e-05	0.00102655	0.017,0.088	0.274,0.246	-0.208
	FBgn0039065	Rad60	3R	23249443	23251477	-	23250599	23251102	23250605	23251102	23250426	23250540	9,9	22,24	33,17	3,0	154	149	5.67324e-14	3.26779e-11	0.284,0.266	0.914,1.0	-0.682
	FBgn0039450	Yif1	3R	26717871	26719806	+	26717870	26718026	26717870	26718011	26718327	26718866	3,1	10,15	10,6	2,3	163	149	9.22578e-06	0.0010122	0.215,0.057	0.82,0.646	-0.597
	FBgn0039467	CG14253	3R	26978541	26985706	+	26980517	26980876	26980517	26980702	26981513	26981751	0,0	5,11	18,9	47,31	298	149	0.000399343	0.0184216	0.0,0.0	0.161,0.127	-0.144
	FBgn0039790	CG2246	3R	30592971	30601489	-	30599918	30600323	30600123	30600323	30595389	30595626	0,0	32,27	24,10	11,8	298	149	5.9952e-15	4.60432e-12	0.0,0.0	0.522,0.385	-0.454
	FBgn0039790	CG2246	3R	30592971	30601489	-	30599918	30600323	30600263	30600323	30595389	30595626	0,0	9,7	22,10	3,6	298	149	1.35822e-10	4.47048e-08	0.0,0.0	0.786,0.455	-0.621
	FBgn0039790	CG2246	3R	30592971	30601489	-	30601200	30601489	30601416	30601489	30595389	30595626	122,74	103,74	112,32	42,10	298	149	0.000734498	0.0305356	0.372,0.333	0.571,0.615	-0.24
	FBgn0052707	APC4	X	9082931	9085867	+	9083998	9084175	9083998	9084169	9084236	9084399	20,19	15,18	44,42	13,4	154	149	0.000923887	0.0354773	0.563,0.505	0.766,0.91	-0.304
	FBgn0260388	CG42514	3L	16491838	16496236	-	16496052	16496236	16496138	16496236	16495299	16495536	0,1	43,26	25,5	23,7	234	149	1.70472e-10	4.9096e-08	0.0,0.024	0.409,0.313	-0.349
	FBgn0260486	Ziz	2L	7472513	7496307	-	7473419	7473889	7473656	7473889	7472512	7473199	5,4	6,13	23,24	7,2	298	149	6.33789e-05	0.00456328	0.294,0.133	0.622,0.857	-0.526
	FBgn0262872	milt	2L	7037823	7056010	+	7037822	7038366	7037822	7038278	7040472	7040780	4,9	82,60	27,7	28,17	236	149	0.000117259	0.00730177	0.03,0.087	0.378,0.206	-0.233
	FBgn0263289	scrib	3R	26536350	26604051	+	26536349	26536531	26536349	26536397	26537370	26537784	6,2	20,8	80,32	35,22	282	149	1.73923e-05	0.00160287	0.137,0.117	0.547,0.435	-0.364
	FBgn0263289	scrib	3R	26536350	26604051	+	26536349	26536531	26536349	26536501	26537370	26537784	6,2	62,24	80,32	53,21	178	149	5.88418e-15	4.60432e-12	0.075,0.065	0.558,0.561	-0.49
	FBgn0264357	SNF4Agamma	3R	21140739	21214269	+	21199180	21199396	21199180	21199331	21200759	21201408	0,0	8,4	7,6	21,9	213	149	0.000650778	0.0281162	0.0,0.0	0.189,0.318	-0.254
	FBgn0267001	Ten-a	X	12043698	12335214	+	12203797	12203984	12203797	12203978	12204138	12204409	0,0	8,5	10,1	5,4	154	149	0.00108651	0.0385126	0.0,0.0	0.659,0.195	-0.427
	GeneID	gene_symbol	seqnames	start	end	strand	longExonStart_0base	longExonEnd	shortES	shortEE	flankingES	flankingEE	IJC_SAMPLE_1	SJC_SAMPLE_1	IJC_SAMPLE_2	SJC_SAMPLE_2	IncFormLen	SkipFormLen	PValue	FDR	IncLevel1	IncLevel2	IncLevelDifference
a3ss_up	FBgn0000414	Dab	3L	16712126	16724575	+	16718021	16721016	16718246	16721016	16717606	16717840	6,11	0,1	21,8	8,3	298	149	0.000633442	0.0423938	1.0,0.846	0.568,0.571	0.354
	FBgn0025820	JTBR	3L	1802008	1802856	-	1802007	1802753	1802007	1802743	1802803	1802856	4,11	23,17	1,0	34,5	158	149	0.000380021	0.0305706	0.141,0.379	0.027,0.0	0.246
	FBgn0031187	Usp2	X	22455803	22470146	+	22462399	22463272	22462713	22463272	22457613	22458260	24,28	0,0	33,39	6,8	298	149	7.12444e-06	0.00193429	1.0,1.0	0.733,0.709	0.279
	FBgn0031515	CG9664	2L	3291245	3294706	-	3292173	3292301	3292173	3292298	3292459	3292576	52,50	0,1	49,39	15,6	151	149	6.11836e-05	0.0094922	1.0,0.98	0.763,0.865	0.176
	FBgn0036493	CG7255	3L	15304255	15311195	+	15305550	15305679	15305570	15305679	15305297	15305486	60,32	21,19	0,0	12,14	168	149	1.09135e-13	5.92603e-11	0.717,0.599	0.0,0.0	0.658
	FBgn0038652	CG7720	3R	18759236	18795169	-	18768871	18769116	18768871	18769113	18779459	18779575	12,14	26,35	0,0	3,1	151	149	1.58677e-05	0.00313315	0.313,0.283	0.0,0.0	0.298
	FBgn0260745	mfas	3R	11984862	11993315	-	11989209	11989328	11989209	11989325	11992071	11992143	16,8	1,0	28,13	11,3	151	149	0.000220438	0.020817	0.94,1.0	0.715,0.81	0.208
	FBgn0262872	milt	2L	7037823	7056010	+	7046253	7047214	7046319	7047214	7042358	7042512	440,289	46,25	109,38	87,35	214	149	0	0	0.869,0.889	0.466,0.431	0.43
a3ss_down	FBgn0000289	cg	2R	14173693	14182838	+	14177824	14178021	14177860	14178021	14177174	14177477	11,15	19,34	38,32	16,20	184	149	0.000265325	0.0230515	0.319,0.263	0.658,0.564	-0.32
	FBgn0016694	Pdp1	3L	7811458	7867369	-	7816483	7816740	7816483	7816611	7817436	7817662	14,3	11,1	12,3	0,1	277	149	0.000503352	0.0376993	0.406,0.617	1.0,0.617	-0.297
	FBgn0020236	ATPCL	2R	15993531	16001290	-	15996166	15996365	15996166	15996314	15996894	15997218	222,211	109,103	532,529	102,106	199	149	8.51034e-06	0.00205383	0.604,0.605	0.796,0.789	-0.188
	FBgn0030349	CG10353	X	11877737	11887162	-	11884797	11885281	11884797	11885104	11886955	11887162	3,2	8,5	4,2	1,0	298	149	0.000232174	0.0210117	0.158,0.167	0.667,1.0	-0.671
	FBgn0039467	CG14253	3R	26978541	26985706	+	26981513	26981751	26981532	26981751	26980517	26980702	5,11	7,9	47,31	0,0	167	149	1.0508e-10	4.5647e-08	0.389,0.522	1.0,1.0	-0.544
	FBgn0039752	CG15530	3R	30177877	30180178	+	30179749	30180178	30179764	30180178	30179577	30179699	19,15	10,6	8,18	1,0	163	149	8.83721e-05	0.0113113	0.635,0.696	0.88,1.0	-0.274
	FBgn0260486	Ziz	2L	7472513	7496307	-	7478850	7480326	7478850	7480323	7480560	7480896	7,6	17,12	36,25	13,11	151	149	8.78075e-05	0.0113113	0.289,0.33	0.732,0.692	-0.402
	FBgn0261671	tweek	2L	16888490	16917052	+	16905490	16905594	16905550	16905594	16905298	16905389	105,67	45,41	155,110	32,16	208	149	0.000644105	0.0423938	0.626,0.539	0.776,0.831	-0.221
	FBgn0267376	SelR	3R	10863355	10868642	-	10866808	10866976	10866808	10866960	10868438	10868642	46,16	28,21	62,52	0,0	164	149	7.66054e-15	5.54623e-12	0.599,0.409	1.0,1.0	-0.496
	FBgn0287209	Gfat1	3R	4126442	4137882	+	4135223	4135381	4135259	4135381	4134366	4134390	157,114	186,144	163,158	83,90	184	149	9.78025e-05	0.0113414	0.406,0.391	0.614,0.587	-0.202
	GeneID	gene_symbol	seqnames	start	end	strand	X1stExonStart_0base	X1stExonEnd	X2ndExonStart_0base	X2ndExonEnd	upstreamES	upstreamEE	downstreamES	downstreamEE	IJC_SAMPLE_1	SJC_SAMPLE_1	IJC_SAMPLE_2	SJC_SAMPLE_2	IncFormLen	SkipFormLen	PValue	FDR	IncLevel1	IncLevel2	IncLevelDifference
mxe_up	FBgn0005278	Sam-S	2L	106903	114432	+	111004	111117	111906	112019	110754	110877	112689	113369	498,309	294,184	221,171	337,226	261	261	3.23767e-07	4.68855e-05	0.629,0.627	0.396,0.431	0.215
	FBgn0010434	cora	2R	19229063	19243751	+	19238788	19241785	19242173	19242395	19238381	19238434	19242483	19242585	1442,1218	258,209	944,496	337,273	298	298	1.98939e-05	0.0011819	0.848,0.854	0.737,0.645	0.16
	FBgn0025641	DAAM	X	1289713	1322362	-	1309858	1309900	1316074	1316161	1295009	1295936	1322199	1322362	76,64	12,4	71,54	37,24	235	190	6.95805e-05	0.00330783	0.837,0.928	0.608,0.645	0.256
	FBgn0028577	hfp	3L	1496853	1502590	-	1500244	1500388	1501350	1501406	1499771	1499879	1501798	1501892	7,6	1,3	5,3	12,10	204	292	0.000620433	0.0148498	0.909,0.741	0.374,0.3	0.488
	FBgn0028671	Vha100-1	3R	29131193	29137980	+	29133271	29133429	29133860	29133961	29132375	29132504	29135048	29135175	676,476	298,228	516,335	449,270	298	249	0.0012102	0.0241728	0.655,0.636	0.49,0.509	0.146
	FBgn0032456	MRP	2L	12719045	12766546	+	12728577	12728798	12729184	12729405	12726745	12727116	12737958	12738176	10,6	49,31	0,0	14,12	298	298	0.00176968	0.032034	0.169,0.162	0.0,0.0	0.166
	FBgn0032456	MRP	2L	12719045	12766546	+	12728577	12728798	12730842	12731066	12726745	12727116	12737958	12738176	10,6	42,22	0,0	29,12	298	298	0.000225138	0.00724506	0.192,0.214	0.0,0.0	0.203
	FBgn0032456	MRP	2L	12719045	12766546	+	12728577	12728798	12737397	12737618	12726745	12727116	12737958	12738176	10,6	27,19	0,0	16,4	298	298	9.83603e-06	0.000633058	0.27,0.24	0.0,0.0	0.255
	FBgn0033159	Dscam1	2R	7317924	7381899	-	7356972	7357096	7358603	7358727	7348130	7348975	7361717	7361867	6,5	2,1	2,0	4,7	272	272	7.73163e-05	0.00351259	0.75,0.833	0.333,0.0	0.625
	FBgn0033159	Dscam1	2R	7317924	7381899	-	7363331	7363490	7363880	7364048	7361717	7361867	7368387	7368732	8,6	5,3	0,3	7,7	298	298	0.00204587	0.0353322	0.615,0.667	0.0,0.3	0.491
	FBgn0035872	Cpsf6	3L	8310493	8315502	-	8313010	8313151	8313956	8314676	8312283	8312750	8315071	8315502	441,323	158,103	493,272	298,190	298	289	0.00228981	0.0378963	0.73,0.753	0.616,0.581	0.143
	FBgn0038826	Syp	3R	20756729	20810726	+	20798314	20798409	20802289	20802551	20792313	20792555	20805946	20806223	349,183	499,432	444,263	2318,1093	243	298	3.8974e-05	0.00215007	0.462,0.342	0.19,0.228	0.193
	FBgn0038826	Syp	3R	20756729	20810726	+	20800016	20800300	20802289	20802551	20798314	20798409	20804674	20805511	427,252	936,1040	268,113	1821,960	298	298	0.0011805	0.0237844	0.313,0.195	0.128,0.105	0.138
	FBgn0039709	Cad99C	3R	29841657	29854699	+	29842724	29842873	29845598	29845760	29841656	29841790	29849076	29849253	69,62	1,9	119,74	102,49	297	298	1.50036e-11	8.69081e-09	0.986,0.874	0.539,0.602	0.359
	FBgn0041182	Tep2	2L	7693727	7701601	-	7697006	7697157	7697976	7698130	7696027	7696206	7698724	7698992	60,54	67,56	57,19	124,80	298	298	0.0017609	0.032034	0.472,0.491	0.315,0.192	0.228
	FBgn0051973	Cda5	2L	25402	65404	-	30393	33270	33844	34288	28981	29068	34557	34604	106,73	3,4	68,20	22,4	298	298	0.000310739	0.0091137	0.972,0.948	0.756,0.833	0.165
	FBgn0053547	Rim	3R	17872748	17916578	-	17878777	17878997	17881177	17881427	17877488	17877666	17881775	17881901	12,8	0,1	10,6	3,8	298	298	0.00026697	0.00820349	1.0,0.889	0.769,0.429	0.346
	FBgn0263346	smash	3R	4659579	4712193	+	4670796	4670850	4680778	4680837	4659578	4660399	4697190	4697542	267,214	18,4	194,68	74,25	202	207	6.67688e-12	5.15678e-09	0.938,0.982	0.729,0.736	0.228
	FBgn0264270	Sxl	X	7074550	7098053	-	7088577	7088749	7090133	7090504	7087613	7087659	7098000	7098053	9,3	17,14	1,1	39,14	298	298	0.00214017	0.0356747	0.346,0.176	0.025,0.067	0.215
	FBgn0287186	scro	3L	24724162	24758036	+	24740904	24741000	24748407	24748494	24734035	24734187	24757360	24758036	21,22	0,1	31,14	9,3	244	235	0.00132396	0.0259967	1.0,0.955	0.768,0.818	0.185
mxe_down	FBgn0000541	E(bx)	3L	233926	246912	-	236553	236755	236862	236906	236138	236427	239054	239185	6,4	6,11	11,12	2,3	192	298	0.00251245	0.0398101	0.608,0.361	0.895,0.861	-0.394
	FBgn0002921	Atpalpha	3R	20948714	20976239	+	20959236	20959380	20960725	20960825	20957733	20958167	20963724	20963856	238,159	174,121	473,199	147,31	292	248	8.34508e-07	9.66778e-05	0.537,0.527	0.732,0.845	-0.256
	FBgn0003261	Rm62	3R	6000426	6008579	-	6005205	6005297	6005949	6006102	6004016	6005126	6008036	6008573	67,54	96,78	96,53	48,33	298	240	0.000169391	0.00617927	0.36,0.358	0.617,0.564	-0.232
	FBgn0003261	Rm62	3R	6000426	6008579	-	6005205	6005297	6005949	6006114	6004016	6005126	6008036	6008573	34,30	96,78	66,36	48,33	298	240	8.91369e-06	0.000633058	0.222,0.236	0.525,0.468	-0.268
	FBgn0003429	slo	3R	24662491	24711595	+	24698197	24698269	24702087	24702162	24695340	24695417	24703020	24703053	1,1	8,5	6,3	4,0	220	223	0.000719706	0.0163486	0.112,0.169	0.603,1.0	-0.661
	FBgn0003429	slo	3R	24662491	24711595	+	24698197	24698269	24703020	24703053	24695340	24695417	24703117	24703307	4,1	14,9	12,3	4,2	220	181	0.000240792	0.00764267	0.19,0.084	0.712,0.552	-0.495
	FBgn0003429	slo	3R	24662491	24711595	+	24699375	24699426	24703020	24703053	24695340	24695417	24703117	24703307	11,7	14,9	17,14	4,2	199	181	0.00042746	0.0112548	0.417,0.414	0.794,0.864	-0.413
	FBgn0003435	sm	2R	19517864	19631508	-	19546011	19546059	19564461	19564512	19538029	19538211	19573987	19574066	15,9	11,2	23,13	1,1	199	196	0.00245351	0.0397537	0.573,0.816	0.958,0.928	-0.249
	FBgn0013305	Nmda1	2R	12877094	12880230	-	12879051	12879146	12879196	12879222	12878384	12878710	12879447	12879656	29,22	58,26	39,30	10,17	174	243	0.00042084	0.0112548	0.411,0.542	0.845,0.711	-0.301
	FBgn0013305	Nmda1	2R	12877094	12880230	-	12879051	12879146	12879196	12879222	12878384	12878710	12879451	12879656	28,19	58,26	39,26	10,17	174	243	0.00038352	0.0105739	0.403,0.505	0.845,0.681	-0.309
	FBgn0013305	Nmda1	2R	12877094	12880230	-	12879051	12879146	12879196	12879222	12878384	12878710	12879688	12879798	120,145	90,68	154,92	25,26	174	243	0.000683818	0.0158441	0.651,0.749	0.896,0.832	-0.164
	FBgn0013733	shot	2R	13864237	13942110	-	13895109	13895307	13899449	13899671	13894838	13894969	13901436	13901572	151,97	170,123	283,177	141,114	298	298	0.000330371	0.00945024	0.47,0.441	0.667,0.608	-0.182
	FBgn0029761	SK	X	5340236	5405138	+	5388241	5388377	5394052	5394188	5383541	5383646	5396183	5396294	1,1	5,8	12,1	4,1	284	284	0.000327479	0.00945024	0.167,0.111	0.75,0.5	-0.486
	FBgn0032456	MRP	2L	12719045	12766546	+	12728020	12728241	12729184	12729405	12726745	12727116	12737958	12738176	64,33	49,31	55,35	14,12	298	298	0.00210055	0.0353322	0.566,0.516	0.797,0.745	-0.23
	FBgn0033159	Dscam1	2R	7317924	7381899	-	7350580	7350704	7351460	7351584	7348130	7348975	7361717	7361867	0,0	6,5	3,1	0,2	272	272	0.00204257	0.0353322	0.0,0.0	1.0,0.333	-0.666
	FBgn0033159	Dscam1	2R	7317924	7381899	-	7350580	7350704	7351698	7351822	7348130	7348975	7361717	7361867	0,0	6,5	3,4	0,2	272	272	4.3611e-07	5.94392e-05	0.0,0.0	1.0,0.667	-0.834
	FBgn0033159	Dscam1	2R	7317924	7381899	-	7350580	7350704	7355290	7355414	7348130	7348975	7361717	7361867	2,1	6,5	6,2	0,2	272	272	0.00107488	0.022369	0.25,0.167	1.0,0.5	-0.541
	FBgn0033159	Dscam1	2R	7317924	7381899	-	7350580	7350704	7356316	7356440	7348130	7348975	7361717	7361867	0,2	6,5	4,2	0,2	272	272	0.000439156	0.0114328	0.0,0.286	1.0,0.5	-0.607
	FBgn0033159	Dscam1	2R	7317924	7381899	-	7350580	7350704	7356972	7357096	7348130	7348975	7361717	7361867	2,1	6,5	4,7	0,2	272	272	3.5497e-05	0.00200602	0.25,0.167	1.0,0.778	-0.68
	FBgn0033159	Dscam1	2R	7317924	7381899	-	7350580	7350704	7357399	7357523	7348130	7348975	7361717	7361867	0,1	6,5	1,3	0,2	272	272	0.00106781	0.022369	0.0,0.167	1.0,0.6	-0.717
	FBgn0033159	Dscam1	2R	7317924	7381899	-	7350580	7350704	7358806	7358930	7348130	7348975	7361717	7361867	4,0	6,5	6,6	0,2	272	272	0.0001709	0.00617927	0.4,0.0	1.0,0.75	-0.675
	FBgn0033159	Dscam1	2R	7317924	7381899	-	7350580	7350704	7359221	7359345	7348130	7348975	7361717	7361867	0,5	6,5	4,4	0,2	272	272	0.00232704	0.0379702	0.0,0.5	1.0,0.667	-0.584
	FBgn0033159	Dscam1	2R	7317924	7381899	-	7350580	7350704	7359441	7359565	7348130	7348975	7361717	7361867	4,2	6,5	9,5	0,2	272	272	0.000345273	0.00975606	0.4,0.286	1.0,0.714	-0.514
	FBgn0033159	Dscam1	2R	7317924	7381899	-	7350580	7350704	7359874	7360007	7348130	7348975	7361717	7361867	3,7	6,5	10,6	0,2	281	272	0.00158143	0.0293134	0.326,0.575	1.0,0.744	-0.421
	FBgn0033159	Dscam1	2R	7317924	7381899	-	7350580	7350704	7360081	7360205	7348130	7348975	7361717	7361867	3,4	6,5	13,3	0,2	272	272	0.0010738	0.022369	0.333,0.444	1.0,0.6	-0.412
	FBgn0033159	Dscam1	2R	7317924	7381899	-	7350580	7350704	7360525	7360649	7348130	7348975	7361717	7361867	4,1	6,5	8,8	0,2	272	272	7.13818e-05	0.00330783	0.4,0.167	1.0,0.8	-0.617
	FBgn0033159	Dscam1	2R	7317924	7381899	-	7358603	7358727	7358806	7358930	7348130	7348975	7361717	7361867	4,0	6,5	6,6	2,0	272	272	0.0001709	0.00617927	0.4,0.0	0.75,1.0	-0.675
	FBgn0033159	Dscam1	2R	7317924	7381899	-	7358603	7358727	7359221	7359345	7348130	7348975	7361717	7361867	0,5	6,5	4,4	2,0	272	272	0.00232704	0.0379702	0.0,0.5	0.667,1.0	-0.584
	FBgn0033159	Dscam1	2R	7317924	7381899	-	7358603	7358727	7359441	7359565	7348130	7348975	7361717	7361867	4,2	6,5	9,5	2,0	272	272	0.000209765	0.00694323	0.4,0.286	0.818,1.0	-0.566
	FBgn0033159	Dscam1	2R	7317924	7381899	-	7358603	7358727	7359874	7360007	7348130	7348975	7361717	7361867	3,7	6,5	10,6	2,0	281	272	0.00124051	0.0245662	0.326,0.575	0.829,1.0	-0.464
	FBgn0033159	Dscam1	2R	7317924	7381899	-	7358603	7358727	7360081	7360205	7348130	7348975	7361717	7361867	3,4	6,5	13,3	2,0	272	272	0.000196887	0.00661142	0.333,0.444	0.867,1.0	-0.545
	FBgn0033159	Dscam1	2R	7317924	7381899	-	7358603	7358727	7360525	7360649	7348130	7348975	7361717	7361867	4,1	6,5	8,8	2,0	272	272	7.13818e-05	0.00330783	0.4,0.167	0.8,1.0	-0.617
	FBgn0033159	Dscam1	2R	7317924	7381899	-	7363880	7364048	7365942	7366104	7361717	7361867	7368387	7368732	11,13	8,6	28,26	0,3	298	298	0.000269083	0.00820349	0.579,0.684	1.0,0.897	-0.317
	FBgn0041182	Tep2	2L	7693727	7701601	-	7696593	7696807	7697006	7697157	7696027	7696206	7698724	7698992	67,56	386,287	124,80	75,49	298	298	0	0	0.148,0.163	0.623,0.62	-0.466
	FBgn0041182	Tep2	2L	7693727	7701601	-	7696593	7696807	7697400	7697581	7696027	7696206	7698724	7698992	336,330	386,287	358,231	75,49	298	298	0	0	0.465,0.535	0.827,0.825	-0.326
	FBgn0041182	Tep2	2L	7693727	7701601	-	7696593	7696807	7697976	7698130	7696027	7696206	7698724	7698992	60,54	386,287	57,19	75,49	298	298	0.000607245	0.0148104	0.135,0.158	0.432,0.279	-0.209
	FBgn0041182	Tep2	2L	7693727	7701601	-	7696593	7696807	7698373	7698551	7696027	7696206	7698724	7698992	50,32	386,287	37,23	75,49	298	298	5.76718e-06	0.000477234	0.115,0.1	0.33,0.319	-0.217
	FBgn0053208	Mical	3R	10001554	10042895	-	10016289	10016826	10017572	10017839	10008695	10008854	10018496	10018558	31,36	39,39	233,151	101,82	298	298	0.00147148	0.0279023	0.443,0.48	0.698,0.648	-0.212
	FBgn0284408	trol	X	2470460	2545427	-	2495040	2495238	2495611	2495728	2494403	2494637	2495947	2496033	0,0	24,20	10,5	39,29	265	298	0.000371078	0.0103589	0.0,0.0	0.224,0.162	-0.193

## Sheet: 5. 95Cc del vs WT
	GeneID	gene_symbol	seqnames	start	end	strand	exonStart_0base	exonEnd	upstreamES	upstreamEE	downstreamES	downstreamEE	IJC_SAMPLE_1	SJC_SAMPLE_1	IJC_SAMPLE_2	SJC_SAMPLE_2	IncFormLen	SkipFormLen	PValue	FDR	IncLevel1	IncLevel2	IncLevelDifference
se_up	FBgn0005666	bt	4	724400	776474	+	736148	736187	735904	736030	736818	737046	204,170	0,0	250,341	58,42	187	149	6.75637e-12	7.33742e-09	1.0,1.0	0.774,0.866	0.18
	FBgn0023083	fray	3R	18573091	18589459	+	18577566	18577584	18573090	18573525	18586278	18589453	239,189	0,0	174,187	18,25	166	149	0.000332231	0.0360803	1.0,1.0	0.897,0.87	0.117
	FBgn0031514	OtopLb	2L	3275800	3280534	-	3278156	3278603	3277828	3277981	3279253	3279470	149,111	41,18	45,23	27,26	298	149	0.000431785	0.042629	0.645,0.755	0.455,0.307	0.319
	FBgn0033636	tou	2R	11577485	11616045	-	11587537	11587582	11587096	11587138	11587645	11587711	137,87	15,4	90,99	42,24	193	149	0.000424219	0.042629	0.876,0.944	0.623,0.761	0.218
	FBgn0039734	Tace	3R	30000530	30003678	+	30001824	30001963	30001511	30001706	30002150	30002386	35,24	1,1	8,21	8,8	287	149	1.3547e-05	0.0028331	0.948,0.926	0.342,0.577	0.478
	FBgn0052311	zormin	3L	2117466	2151700	-	2124181	2124613	2118766	2119129	2125238	2126670	114,72	102,89	49,35	124,120	298	149	8.66298e-05	0.012544	0.358,0.288	0.165,0.127	0.177
	FBgn0053111	CG33111	3R	23801714	23819237	-	23805759	23806120	23801713	23802241	23806625	23806821	65,73	36,39	38,43	73,57	298	149	9.97261e-05	0.0135952	0.474,0.483	0.207,0.274	0.238
	FBgn0259111	Ndae1	2L	7223328	7249343	-	7236144	7236351	7234526	7234997	7237686	7237790	127,103	65,70	115,99	139,189	298	149	7.89506e-05	0.0118262	0.494,0.424	0.293,0.208	0.208
	FBgn0259214	PMCA	4	328193	358917	-	331397	332002	330270	330339	342921	343060	776,500	228,151	536,499	294,303	298	149	0.000268668	0.0324192	0.63,0.623	0.477,0.452	0.162
	FBgn0261984	Ire1	3R	19853908	19861291	-	19860646	19860761	19857240	19857684	19860885	19861291	461,366	16,6	201,255	34,40	263	149	1.11626e-07	3.73002e-05	0.942,0.972	0.77,0.783	0.18
	FBgn0265045	Strn-Mlck	2R	15946933	15989498	-	15948004	15948710	15946932	15947606	15948807	15948985	165,103	31,25	88,81	73,69	298	149	5.9019e-09	2.56378e-06	0.727,0.673	0.376,0.37	0.327
	FBgn0265045	Strn-Mlck	2R	15946933	15989498	-	15948163	15948710	15946932	15947606	15948807	15948985	77,34	31,25	40,29	73,69	298	149	6.58301e-05	0.0105913	0.554,0.405	0.215,0.174	0.285
	FBgn0265991	Zasp52	2R	15762565	15817004	-	15774427	15775507	15773815	15773966	15777177	15777286	353,182	555,383	159,121	809,631	298	149	9.60526e-07	0.000278168	0.241,0.192	0.089,0.087	0.129
se_down	FBgn0005666	bt	4	724400	776474	+	736338	736515	736148	736187	736818	737046	444,360	166,135	1245,1015	185,222	298	149	0.000295431	0.0337724	0.572,0.571	0.771,0.696	-0.162
	FBgn0011656	Mef2	2R	9913496	9958858	-	9934318	9934377	9921609	9922003	9940744	9940953	80,55	18,14	73,72	5,1	207	149	0.000421028	0.042629	0.762,0.739	0.913,0.981	-0.197
	FBgn0013576	mtd	3R	5270116	5350443	-	5335713	5336635	5334404	5335060	5349467	5350010	1,1	12,3	8,5	0,2	298	149	5.72915e-06	0.00130986	0.04,0.143	1.0,0.556	-0.686
	FBgn0013995	Calx	3R	20978183	21015613	+	20986146	20986382	20985978	20986083	20992240	20994423	18,9	25,13	21,21	1,1	298	149	4.9431e-10	3.5788e-07	0.265,0.257	0.913,0.913	-0.652
	FBgn0016694	Pdp1	3L	7811458	7867369	-	7819987	7820029	7818068	7818223	7830386	7831827	9,9	16,16	17,11	1,1	190	149	2.76802e-08	1.09312e-05	0.306,0.306	0.93,0.896	-0.607
	FBgn0026147	TTLL4A	2L	10989401	10997897	+	10990095	10990783	10989655	10989870	10991058	10991885	24,31	29,38	34,47	13,16	298	149	0.000387677	0.0410748	0.293,0.29	0.567,0.595	-0.289
	FBgn0038165	Task6	3R	13667046	13674542	-	13669016	13669049	13667045	13668834	13669535	13669696	3,1	15,13	12,4	5,3	181	149	4.165e-05	0.0072371	0.141,0.06	0.664,0.523	-0.493
	FBgn0040305	MTF-1	3L	9430312	9439490	+	9433898	9434046	9430311	9430836	9434395	9434498	12,3	77,59	19,23	15,24	296	149	3.9207e-08	1.4193e-05	0.073,0.025	0.389,0.325	-0.308
	FBgn0053208	Mical	3R	10001554	10042895	-	10037815	10037890	10027329	10027381	10041971	10041998	98,87	15,18	105,87	0,0	223	149	5.82254e-09	2.56378e-06	0.814,0.764	1.0,1.0	-0.211
	FBgn0261988	Gprk2	3R	31405245	31457873	+	31410353	31410401	31405244	31405956	31433458	31433888	42,24	186,109	302,284	19,13	196	149	0	0	0.147,0.143	0.924,0.943	-0.788
	FBgn0263346	smash	3R	4659579	4712193	+	4680778	4680837	4659578	4660399	4697190	4697542	18,4	11,5	86,73	0,0	207	149	7.17848e-10	4.45476e-07	0.541,0.365	1.0,1.0	-0.547
	FBgn0263346	smash	3R	4659579	4712193	+	4680778	4680837	4670796	4670850	4697190	4697542	55,40	106,111	205,192	4,2	207	149	0	0	0.272,0.206	0.974,0.986	-0.741
	FBgn0263980	Stacl	2R	15401096	15471884	+	15458898	15459267	15456659	15456815	15463297	15463846	1,0	11,2	2,10	0,3	298	149	1.51013e-05	0.00298183	0.043,0.0	1.0,0.625	-0.791
	FBgn0284408	trol	X	2470460	2545427	-	2495611	2495728	2495040	2495238	2498021	2498115	46,15	9,7	18,9	1,0	265	149	0.000475851	0.0459355	0.742,0.546	0.91,1.0	-0.311
	FBgn0284408	trol	X	2470460	2545427	-	2499210	2499678	2495611	2495728	2501626	2501737	2,7	23,10	17,18	10,6	298	149	0.00028195	0.0331025	0.042,0.259	0.459,0.6	-0.379
	FBgn0284408	trol	X	2470460	2545427	-	2499210	2499678	2498482	2498631	2501626	2501737	2,9	28,16	18,18	5,11	298	149	7.37384e-05	0.01144	0.034,0.22	0.643,0.45	-0.419
	GeneID	gene_symbol	seqnames	start	end	strand	riExonStart_0base	riExonEnd	upstreamES	upstreamEE	downstreamES	downstreamEE	IJC_SAMPLE_1	SJC_SAMPLE_1	IJC_SAMPLE_2	SJC_SAMPLE_2	IncFormLen	SkipFormLen	PValue	FDR	IncLevel1	IncLevel2	IncLevelDifference
ri_up	FBgn0015521	RpS21	2L	2856070	2857029	+	2856376	2856705	2856376	2856568	2856630	2856705	153,70	13,1	68,49	343,337	210	149	0	0	0.893,0.98	0.123,0.094	0.828
	FBgn0036187	RIOK1	3L	11646234	11648474	-	11648239	11648474	11648239	11648319	11648391	11648474	9,10	2,1	6,7	7,9	220	149	0.00103413	0.0469927	0.753,0.871	0.367,0.345	0.456
	FBgn0051477	ATPsynepsilonL	3R	10121773	10122320	+	10121772	10121946	10121772	10121805	10121871	10121946	27,13	0,5	6,3	18,30	214	149	1.73699e-08	6.69319e-06	1.0,0.644	0.188,0.065	0.696
	FBgn0053092	P5CDh2	3R	21877936	21880696	+	21878171	21878577	21878171	21878308	21878368	21878577	25,23	5,2	5,19	13,15	208	149	0.000149924	0.0157556	0.782,0.892	0.216,0.476	0.491
ri_down	FBgn0016696	Pitslre	3L	20771528	20776931	+	20771527	20771864	20771527	20771608	20771667	20771864	4,3	13,14	14,7	6,3	207	149	0.00010998	0.0127137	0.181,0.134	0.627,0.627	-0.47
	FBgn0030098	CG12057	X	9191657	9192548	+	9191656	9192548	9191656	9192344	9192436	9192548	18,17	7,5	2,3	0,0	240	149	2.80208e-06	0.000539868	0.615,0.679	1.0,1.0	-0.353
	FBgn0031228	ND-15	2L	114726	156030	+	155334	155784	155334	155429	155545	155784	1,4	25,14	12,13	12,15	264	149	0.000427475	0.0280676	0.022,0.139	0.361,0.328	-0.264
	FBgn0031228	ND-15	2L	114726	156030	+	155334	155784	155334	155429	155566	155784	2,4	35,15	13,13	15,17	285	149	0.000564983	0.0296873	0.029,0.122	0.312,0.286	-0.223
	FBgn0263611	lncRNA:CR43620	2L	19978829	19979723	+	19978828	19979723	19978828	19979043	19979105	19979723	1,1	9,6	3,10	3,5	210	149	0.000462836	0.0280676	0.073,0.106	0.415,0.587	-0.411
	GeneID	gene_symbol	seqnames	start	end	strand	longExonStart_0base	longExonEnd	shortES	shortEE	flankingES	flankingEE	IJC_SAMPLE_1	SJC_SAMPLE_1	IJC_SAMPLE_2	SJC_SAMPLE_2	IncFormLen	SkipFormLen	PValue	FDR	IncLevel1	IncLevel2	IncLevelDifference
a5ss_up	FBgn0003435	sm	2R	19517864	19631508	-	19573987	19574066	19574002	19574066	19538029	19538391	11,9	1,1	2,2	10,1	163	149	0.00083813	0.0442942	0.91,0.892	0.155,0.646	0.5
	FBgn0027596	Kank	2R	14901475	14928425	-	14907024	14907971	14907487	14907971	14905513	14905953	23,17	0,0	12,27	7,17	298	149	9.37669e-10	5.26735e-07	1.0,1.0	0.462,0.443	0.547
	FBgn0028504	CG12182	3L	2595842	2599579	-	2599124	2599579	2599264	2599579	2597193	2599070	5,7	2,6	0,0	7,7	288	149	9.96172e-06	0.00159886	0.564,0.376	0.0,0.0	0.47
	FBgn0031769	CG9135	2L	6050800	6053877	+	6050838	6051067	6050838	6050921	6051616	6052022	1,2	0,0	5,4	51,30	294	149	1.16066e-05	0.00163001	1.0,1.0	0.047,0.063	0.945
	FBgn0038402	Fer2	3R	16149369	16151312	-	16150279	16150550	16150306	16150550	16149970	16150182	4,3	5,5	1,0	13,10	175	149	0.000847642	0.0442942	0.405,0.338	0.061,0.0	0.341
	FBgn0051038	CG31038	3R	29877059	29903231	+	29896697	29897229	29896697	29897205	29897299	29897645	17,14	2,0	19,16	14,7	172	149	0.00014774	0.0129617	0.88,1.0	0.54,0.664	0.338
	FBgn0087008	e(y)3	X	19626548	19638369	-	19636851	19638369	19637372	19638369	19634133	19636469	14,9	2,3	4,5	6,12	298	149	0.000445367	0.0303254	0.778,0.6	0.25,0.172	0.478
	FBgn0263980	Stacl	2R	15401096	15471884	+	15415124	15416838	15415124	15416831	15419350	15419551	10,7	2,0	24,15	15,25	155	149	0.000334539	0.025057	0.828,1.0	0.606,0.366	0.428
a5ss_down	FBgn0010225	Gel	3R	4235217	4241057	+	4236087	4236281	4236087	4236148	4236552	4236804	0,1	17,6	9,7	9,10	281	149	3.65496e-05	0.0046008	0.0,0.081	0.347,0.271	-0.269
	FBgn0030674	HUWE1	X	15712628	15731935	+	15713900	15714393	15713900	15714381	15714716	15714956	23,28	197,173	57,36	104,98	160	149	9.69297e-05	0.00990005	0.098,0.131	0.338,0.255	-0.182
	FBgn0030735	CG3632	X	16296671	16303308	+	16296670	16296907	16296670	16296883	16297660	16297784	18,9	15,7	4,4	1,0	172	149	0.000528687	0.0329027	0.51,0.527	0.776,1.0	-0.37
	FBgn0030893	RhoGAP16F	X	18093145	18097413	+	18094589	18094815	18094589	18094754	18095084	18096453	1,0	26,23	6,9	5,4	209	149	4.50995e-09	2.02677e-06	0.027,0.0	0.461,0.616	-0.525
	FBgn0031596	CG15429	2L	4352975	4354034	+	4352974	4353195	4352974	4353193	4353249	4353615	6,7	2,11	7,2	0,0	150	149	4.49941e-05	0.00532114	0.749,0.387	1.0,1.0	-0.432
	FBgn0032775	CG17544	2L	19390370	19398493	-	19398334	19398493	19398350	19398493	19393496	19393656	54,34	35,23	66,30	10,6	164	149	0.000205502	0.0159229	0.584,0.573	0.857,0.82	-0.26
	FBgn0033725	Cpr49Ac	2R	12386666	12390057	+	12387381	12387517	12387381	12387427	12387912	12387939	3585,2683	1598,1111	2014,2149	452,394	238	149	1.74887e-06	0.000357246	0.584,0.602	0.736,0.773	-0.161
	FBgn0036685	CG6664	3L	17012886	17016180	-	17015672	17016051	17015742	17016051	17015140	17015266	8,3	268,220	43,32	202,182	218	149	0.000105818	0.0103379	0.02,0.009	0.127,0.107	-0.102
	FBgn0037130	Syn1	3L	21745359	21770534	-	21769917	21770534	21770445	21770534	21760957	21761265	41,18	5,6	63,152	1,1	298	149	0.000390519	0.0274217	0.804,0.6	0.969,0.987	-0.276
	FBgn0038063	Octbeta2R	3R	12550625	12595725	-	12595394	12595725	12595560	12595725	12560400	12561804	0,0	8,4	5,4	2,1	298	149	7.13161e-06	0.00123267	0.0,0.0	0.556,0.667	-0.612
	FBgn0039065	Rad60	3R	23249443	23251477	-	23250599	23251102	23250605	23251102	23250426	23250540	9,9	22,24	37,24	0,2	154	149	0	0	0.284,0.266	1.0,0.921	-0.685
	FBgn0039790	CG2246	3R	30592971	30601489	-	30599918	30600323	30600263	30600323	30595389	30595626	0,0	9,7	20,9	1,6	298	149	1.25164e-07	3.51554e-05	0.0,0.0	0.909,0.429	-0.669
	FBgn0259170	alpha-Man-Ia	X	10266792	10325958	-	10325790	10325958	10325813	10325958	10323565	10324318	10,5	14,13	11,19	3,3	171	149	5.11436e-05	0.00563295	0.384,0.251	0.762,0.847	-0.487
	FBgn0260388	CG42514	3L	16491838	16496236	-	16496052	16496236	16496138	16496236	16495299	16495536	0,1	43,26	62,93	60,65	234	149	0	0	0.0,0.024	0.397,0.477	-0.425
	GeneID	gene_symbol	seqnames	start	end	strand	longExonStart_0base	longExonEnd	shortES	shortEE	flankingES	flankingEE	IJC_SAMPLE_1	SJC_SAMPLE_1	IJC_SAMPLE_2	SJC_SAMPLE_2	IncFormLen	SkipFormLen	PValue	FDR	IncLevel1	IncLevel2	IncLevelDifference
a3ss_up	FBgn0028952	Kebab	2L	2045494	2048054	+	2046065	2046218	2046068	2046218	2045699	2046011	11,12	0,0	9,12	14,3	151	149	0.000100585	0.00973388	1.0,1.0	0.388,0.798	0.407
	FBgn0260745	mfas	3R	11984862	11993315	-	11989209	11989523	11989209	11989328	11992741	11992852	159,111	168,102	34,49	146,96	298	149	5.11498e-05	0.00573147	0.321,0.352	0.104,0.203	0.183
	FBgn0262527	nsl1	3R	15793782	15802102	+	15798720	15799036	15798723	15799036	15798086	15798404	29,13	10,3	6,7	16,11	151	149	0.000114754	0.0106222	0.741,0.81	0.27,0.386	0.448
	FBgn0264894	CG44085	2L	13261008	13284043	+	13274642	13274850	13274690	13274850	13274309	13274376	27,19	15,10	14,1	23,18	196	149	0.000764661	0.0457874	0.578,0.591	0.316,0.041	0.406
	FBgn0283724	Girdin	3L	3178930	3185287	+	3184248	3185287	3184251	3185287	3183635	3183799	7,16	0,1	13,6	6,6	151	149	1.2685e-05	0.00192903	1.0,0.94	0.681,0.497	0.381
a3ss_down	FBgn0000578	ena	2R	19141632	19163705	+	19160176	19160902	19160248	19160902	19159782	19160035	38,32	7,8	30,29	0,1	220	149	0.000126935	0.0112602	0.786,0.73	1.0,0.952	-0.218
	FBgn0000578	ena	2R	19141632	19163705	+	19160179	19160902	19160248	19160902	19159782	19160035	36,47	7,8	28,36	0,1	217	149	0.000416903	0.0290468	0.779,0.801	1.0,0.961	-0.19
	FBgn0003380	Sh	X	17924307	18063247	-	17940719	17941160	17940719	17941157	17942781	17942972	3,2	6,5	8,4	1,1	151	149	0.00023328	0.0183946	0.33,0.283	0.888,0.798	-0.536
	FBgn0003435	sm	2R	19517864	19631508	-	19538029	19538391	19538029	19538211	19574002	19574066	1,1	21,15	12,5	10,8	298	149	3.67916e-05	0.00460761	0.023,0.032	0.375,0.238	-0.279
	FBgn0013995	Calx	3R	20978183	21015613	+	21011266	21011415	21011281	21011415	21008721	21008736	9,1	7,7	3,8	0,1	163	149	4.55936e-05	0.00539271	0.54,0.116	1.0,0.88	-0.612
	FBgn0028411	Nxt1	2R	23811321	23811974	-	23811320	23811737	23811320	23811724	23811794	23811881	0,2	75,59	8,9	45,26	161	149	0.000675534	0.0444855	0.0,0.03	0.141,0.243	-0.177
	FBgn0031939	CG13796	2L	7727157	7732670	-	7730197	7730865	7730197	7730752	7732478	7732670	0,8	29,17	9,8	4,5	261	149	0.000168595	0.0143575	0.0,0.212	0.562,0.477	-0.414
	FBgn0039003	wfs1	3R	22687542	22690380	-	22688452	22690017	22688452	22690014	22690074	22690173	11,8	12,8	24,14	2,3	151	149	0.000183192	0.0150006	0.475,0.497	0.922,0.822	-0.386
	FBgn0039026	CG7029	3R	22750901	22794030	+	22792257	22792599	22792389	22792599	22789492	22792000	77,46	40,36	60,64	6,10	280	149	5.93485e-06	0.00105294	0.506,0.405	0.842,0.773	-0.352
	FBgn0039026	CG7029	3R	22750901	22794030	+	22792260	22792599	22792389	22792599	22789492	22792000	8,4	40,36	8,10	6,10	277	149	0.000742596	0.0457874	0.097,0.056	0.418,0.35	-0.307
	FBgn0051374	sals	3R	11437547	11451791	-	11447118	11448362	11447118	11448359	11451066	11451150	4,0	6,8	10,7	1,1	151	149	1.16565e-05	0.00190898	0.397,0.0	0.908,0.874	-0.693
	FBgn0263077	CG43340	2R	7623242	7651787	+	7638052	7638372	7638119	7638372	7636894	7637193	2,3	12,7	14,17	3,5	215	149	3.99011e-06	0.000943883	0.104,0.229	0.764,0.702	-0.567
	FBgn0263241	Mocs1	3L	11070526	11073348	+	11072469	11073348	11072561	11073348	11071558	11072410	62,26	13,9	53,51	0,0	240	149	1.5221e-08	8.10139e-06	0.748,0.642	1.0,1.0	-0.305
	FBgn0265935	coro	2R	6862001	6872718	-	6863347	6863554	6863347	6863533	6864277	6864571	161,131	304,214	208,205	189,177	169	149	0.000689535	0.0444855	0.318,0.351	0.492,0.505	-0.164
	FBgn0267376	SelR	3R	10863355	10868642	-	10866808	10866976	10866808	10866960	10868438	10868642	46,16	28,21	35,38	0,0	164	149	1.17217e-12	2.49556e-09	0.599,0.409	1.0,1.0	-0.496
	GeneID	gene_symbol	seqnames	start	end	strand	X1stExonStart_0base	X1stExonEnd	X2ndExonStart_0base	X2ndExonEnd	upstreamES	upstreamEE	downstreamES	downstreamEE	IJC_SAMPLE_1	SJC_SAMPLE_1	IJC_SAMPLE_2	SJC_SAMPLE_2	IncFormLen	SkipFormLen	PValue	FDR	IncLevel1	IncLevel2	IncLevelDifference
mxe_up	FBgn0011224	heph	3R	31846987	32015520	-	31969755	31969785	31975447	31975965	31959034	31959127	31979522	31979619	206,176	66,90	144,130	138,159	298	178	4.38143e-05	0.00306408	0.651,0.539	0.384,0.328	0.239
	FBgn0032456	MRP	2L	12719045	12766546	+	12729184	12729405	12730842	12731066	12726745	12727116	12737958	12738176	49,31	42,22	31,28	85,67	298	298	6.9894e-05	0.00431287	0.538,0.585	0.267,0.295	0.28
	FBgn0033159	Dscam1	2R	7317924	7381899	-	7358002	7358129	7359441	7359565	7348130	7348975	7361717	7361867	4,2	2,1	1,0	10,1	272	275	4.04561e-05	0.00292679	0.669,0.669	0.092,0.0	0.623
	FBgn0033159	Dscam1	2R	7317924	7381899	-	7358215	7358339	7359441	7359565	7348130	7348975	7361717	7361867	4,2	3,0	1,0	12,2	272	272	7.75881e-05	0.00465085	0.571,1.0	0.077,0.0	0.747
	FBgn0033159	Dscam1	2R	7317924	7381899	-	7359666	7359790	7359874	7360007	7348130	7348975	7361717	7361867	3,7	1,0	4,2	2,9	281	272	0.00024451	0.0116587	0.744,1.0	0.659,0.177	0.454
	FBgn0033159	Dscam1	2R	7317924	7381899	-	7359666	7359790	7360081	7360205	7348130	7348975	7361717	7361867	3,4	1,0	4,11	2,9	272	272	0.0017288	0.043699	0.75,1.0	0.667,0.55	0.266
	FBgn0033159	Dscam1	2R	7317924	7381899	-	7359666	7359790	7360290	7360414	7348130	7348975	7361717	7361867	5,1	1,0	1,2	2,9	272	272	1.9662e-05	0.00165003	0.833,1.0	0.333,0.182	0.659
	FBgn0033159	Dscam1	2R	7317924	7381899	-	7363331	7363490	7363880	7364048	7361717	7361867	7368387	7368732	8,6	5,3	0,2	3,9	298	298	0.000315738	0.0129886	0.615,0.667	0.0,0.182	0.55
	FBgn0039215	CG6695	3R	24655160	24659379	+	24657515	24657609	24658320	24658411	24655571	24657410	24658498	24658604	122,83	82,79	28,35	87,55	242	239	0.00128818	0.0360348	0.595,0.509	0.241,0.386	0.239
	FBgn0050463	Pgant9	2R	16673235	16732916	-	16678410	16678512	16678745	16678856	16675140	16675248	16678980	16679071	284,232	124,70	170,152	165,141	259	250	3.5239e-06	0.000434891	0.689,0.762	0.499,0.51	0.221
	FBgn0053558	mim	2R	6924687	6971637	-	6928508	6928836	6929072	6929273	6926669	6926821	6929822	6930098	30,31	95,68	3,15	103,86	298	298	0.000587706	0.0216317	0.24,0.313	0.028,0.149	0.188
	FBgn0259214	PMCA	4	328193	358917	-	330270	330339	331397	332002	328815	329428	342921	343060	774,494	307,206	535,501	427,422	298	217	4.0125e-05	0.00292679	0.647,0.636	0.477,0.464	0.171
	FBgn0261552	ps	3R	9417940	9455500	+	9432028	9432839	9444010	9444076	9419782	9420047	9445043	9445187	263,269	94,94	167,197	128,151	298	214	0.000180431	0.00923276	0.668,0.673	0.484,0.484	0.187
	FBgn0263346	smash	3R	4659579	4712193	+	4670796	4670850	4680778	4680837	4659578	4660399	4697190	4697542	267,214	18,4	113,83	86,73	202	207	0	0	0.938,0.982	0.574,0.538	0.404
	FBgn0264695	Mhc	2L	16766566	16788766	+	16771941	16772045	16773276	16773380	16771042	16771141	16774449	16774857	254,137	53,37	357,233	221,253	252	252	1.79927e-06	0.000269634	0.827,0.787	0.618,0.479	0.258
mxe_down	FBgn0000667	Actn	X	2023822	2042311	-	2028664	2028750	2029840	2029926	2027934	2028027	2030214	2030368	216,181	88,73	419,388	49,62	234	234	7.94498e-06	0.000757381	0.711,0.713	0.895,0.862	-0.167
	FBgn0003429	slo	3R	24662491	24711595	+	24698197	24698269	24703020	24703053	24695340	24695417	24703117	24703307	4,1	14,9	4,10	2,1	220	181	2.81374e-05	0.00218638	0.19,0.084	0.622,0.892	-0.62
	FBgn0013305	Nmda1	2R	12877094	12880230	-	12879051	12879146	12879196	12879222	12878384	12878710	12879447	12879656	29,22	58,26	39,36	4,5	174	243	1.27678e-10	8.92895e-08	0.411,0.542	0.932,0.91	-0.445
	FBgn0013305	Nmda1	2R	12877094	12880230	-	12879051	12879146	12879196	12879222	12878384	12878710	12879451	12879656	28,19	58,26	37,35	4,5	174	243	1.10174e-11	1.15573e-08	0.403,0.505	0.928,0.907	-0.463
	FBgn0013305	Nmda1	2R	12877094	12880230	-	12879051	12879146	12879196	12879222	12878384	12878710	12879688	12879798	120,145	90,68	122,261	19,50	174	243	2.56044e-05	0.00206608	0.651,0.749	0.9,0.879	-0.19
	FBgn0013576	mtd	3R	5270116	5350443	-	5334404	5335060	5335713	5336635	5299469	5299573	5349467	5350010	2,1	18,12	7,8	9,8	298	298	0.000498759	0.0190254	0.1,0.077	0.437,0.5	-0.38
	FBgn0032456	MRP	2L	12719045	12766546	+	12730842	12731066	12737397	12737618	12726745	12727116	12737958	12738176	42,22	27,19	85,67	10,22	298	298	0.00181042	0.0452174	0.609,0.537	0.895,0.753	-0.251
	FBgn0033159	Dscam1	2R	7317924	7381899	-	7350580	7350704	7359666	7359790	7348130	7348975	7361717	7361867	1,0	6,5	2,9	9,3	272	272	0.00171859	0.043699	0.143,0.0	0.182,0.75	-0.394
	FBgn0033159	Dscam1	2R	7317924	7381899	-	7358603	7358727	7359666	7359790	7348130	7348975	7361717	7361867	1,0	6,5	2,9	0,3	272	272	1.05608e-06	0.000184637	0.143,0.0	1.0,0.75	-0.803
	FBgn0033159	Dscam1	2R	7317924	7381899	-	7358603	7358727	7360525	7360649	7348130	7348975	7361717	7361867	4,1	6,5	12,5	0,3	272	272	0.00144729	0.0393835	0.4,0.167	1.0,0.625	-0.529
	FBgn0033159	Dscam1	2R	7317924	7381899	-	7363880	7364048	7365017	7365179	7361717	7361867	7368387	7368732	9,9	8,6	9,17	0,2	298	298	0.000229694	0.0114738	0.529,0.6	1.0,0.895	-0.383
	FBgn0033159	Dscam1	2R	7317924	7381899	-	7363880	7364048	7365311	7365482	7361717	7361867	7368387	7368732	6,11	8,6	4,17	0,2	298	298	0.000850136	0.0283109	0.429,0.647	1.0,0.895	-0.409
	FBgn0033159	Dscam1	2R	7317924	7381899	-	7363880	7364048	7366465	7366627	7361717	7361867	7368387	7368732	2,9	8,6	15,7	0,2	298	298	0.000288318	0.0126019	0.2,0.6	1.0,0.778	-0.489
	FBgn0265991	Zasp52	2R	15762565	15817004	-	15763925	15764835	15765122	15765252	15763645	15763829	15773815	15773966	287,304	343,243	516,597	171,215	278	298	1.79394e-07	3.76369e-05	0.473,0.573	0.764,0.749	-0.234
	FBgn0265991	Zasp52	2R	15762565	15817004	-	15763925	15764835	15765122	15765447	15763645	15763829	15773815	15773966	262,266	343,243	507,581	171,215	298	298	6.92119e-10	2.71772e-07	0.433,0.523	0.748,0.73	-0.261
	FBgn0265991	Zasp52	2R	15762565	15817004	-	15763925	15764835	15765122	15767253	15763645	15763829	15773815	15773966	260,266	343,243	507,580	171,215	298	298	9.06769e-10	2.71772e-07	0.431,0.523	0.748,0.73	-0.262
	FBgn0265991	Zasp52	2R	15762565	15817004	-	15763925	15764835	15765122	15769551	15763645	15763829	15773815	15773966	260,266	343,243	507,580	171,215	298	298	9.06769e-10	2.71772e-07	0.431,0.523	0.748,0.73	-0.262
	FBgn0284408	trol	X	2470460	2545427	-	2495040	2495238	2499210	2499678	2494403	2494637	2501626	2501737	2,8	28,14	16,18	13,8	298	298	0.00113991	0.0341648	0.067,0.364	0.552,0.692	-0.406
